# Supplementary material
Source: MDPI journal article supplement (https://www.mdpi.com/2673-6756/2/1/10)
Supplement: s1 [file s1]

Archive with 2 entries (2 files):
- forensicsci-1189369 supplementary.pdf
- forensicsci-1189369.xlsx
