# Supplementary material
Source: MDPI journal article supplement (https://www.mdpi.com/2673-6756/2/1/10)
Supplement: s1 [file s1 › forensicsci-1189369 supplementary.pdf]

# Profiling of Successional Microbial Community Structure and Composition to Identify Exhumed Gravesoil – A Preliminary Study

Ayodeji O Olakanye and T. Komang Ralebitso-Senior

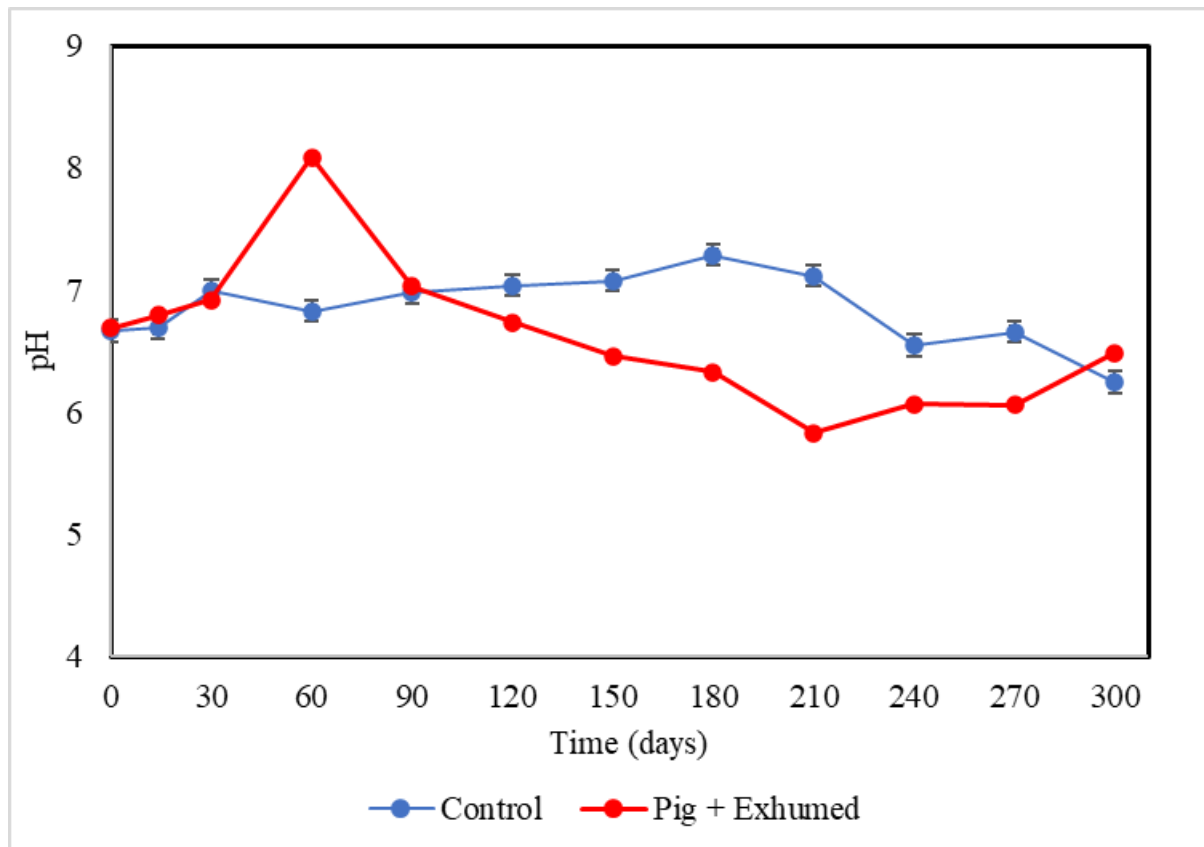

Supplementary Figure S1: Changes in pH values of the control (●) and piglet-exhumed (●) mesocosms during 300 days of study. Arrow identifies day of exhumation.
