# Supplementary material
Source: MDPI journal article supplement (https://www.mdpi.com/2673-6756/2/1/10)
Supplement: s1 [file s1 › forensicsci-1189369.xlsx]

## Sheet: Supplementary Table S1
OTU	Size	Taxonomy
Otu00001	44306	Bacteria(100);"Acidobacteria"(100);Acidobacteria_Gp6(100);Acidobacteria_Gp6_order_incertae_sedis(100);Acidobacteria_Gp6_family_incertae_sedis(100);Gp6(100);
Otu00002	32079	Bacteria(100);"Proteobacteria"(100);Gammaproteobacteria(100);Xanthomonadales(100);Xanthomonadaceae(100);Rhodanobacter(100);
Otu00003	25023	Bacteria(100);"Verrucomicrobia"(100);Spartobacteria(100);Spartobacteria_order_incertae_sedis(100);Spartobacteria_family_incertae_sedis(100);Spartobacteria_genera_incertae_sedis(100);
Otu00004	19340	Bacteria(100);"Acidobacteria"(100);Acidobacteria_Gp6(100);Acidobacteria_Gp6_order_incertae_sedis(100);Acidobacteria_Gp6_family_incertae_sedis(100);Gp6(100);
Otu00005	19029	Bacteria(100);"Verrucomicrobia"(100);Spartobacteria(100);Spartobacteria_order_incertae_sedis(100);Spartobacteria_family_incertae_sedis(100);Spartobacteria_genera_incertae_sedis(100);
Otu00007	14378	Bacteria(100);"Acidobacteria"(100);Acidobacteria_Gp16(100);Acidobacteria_Gp16_order_incertae_sedis(100);Acidobacteria_Gp16_family_incertae_sedis(100);Gp16(100);
Otu00008	13692	Bacteria(100);Firmicutes(100);Bacilli(100);Bacillales(100);Bacillaceae_1(97);Bacillus(97);
Otu00009	12613	Bacteria(100);"Acidobacteria"(100);Acidobacteria_Gp4(100);Acidobacteria_Gp4_order_incertae_sedis(100);Acidobacteria_Gp4_family_incertae_sedis(100);Gp4(100);
Otu00010	12509	Bacteria(100);"Actinobacteria"(100);Actinobacteria(100);Actinomycetales(100);Microbacteriaceae(100);unclassified(98);
Otu00012	11868	Bacteria(100);"Proteobacteria"(100);Gammaproteobacteria(100);Xanthomonadales(100);Xanthomonadaceae(100);Rhodanobacter(100);
Otu00013	11391	Bacteria(100);"Bacteroidetes"(100);"Sphingobacteria"(100);"Sphingobacteriales"(100);Chitinophagaceae(100);unclassified(100);
Otu00015	10395	Bacteria(100);"Proteobacteria"(100);Alphaproteobacteria(100);Rhizobiales(100);unclassified(100);unclassified(100);
Otu00016	9724	Bacteria(100);Firmicutes(100);Bacilli(100);Bacillales(100);Planococcaceae(81);Sporosarcina(75);
Otu00017	8894	Bacteria(100);"Proteobacteria"(100);Alphaproteobacteria(100);Rhizobiales(100);Bradyrhizobiaceae(100);Bradyrhizobium(99);
Otu00018	8864	Bacteria(100);unclassified(100);unclassified(100);unclassified(100);unclassified(100);unclassified(100);
Otu00019	7576	Bacteria(100);"Acidobacteria"(100);Acidobacteria_Gp4(100);Acidobacteria_Gp4_order_incertae_sedis(100);Acidobacteria_Gp4_family_incertae_sedis(100);Gp4(100);
Otu00020	7561	Bacteria(100);"Acidobacteria"(100);Acidobacteria_Gp6(100);Acidobacteria_Gp6_order_incertae_sedis(100);Acidobacteria_Gp6_family_incertae_sedis(100);Gp6(100);
Otu00021	7377	Bacteria(100);"Proteobacteria"(99);unclassified(99);unclassified(99);unclassified(99);unclassified(99);
Otu00022	7299	Bacteria(100);"Proteobacteria"(100);Alphaproteobacteria(100);Rhizobiales(100);Hyphomicrobiaceae(92);Rhodoplanes(92);
Otu00023	7225	Bacteria(100);"Proteobacteria"(100);Betaproteobacteria(100);Burkholderiales(100);unclassified(64);unclassified(64);
Otu00024	7057	Bacteria(100);"Proteobacteria"(100);Alphaproteobacteria(100);Rhizobiales(100);Hyphomicrobiaceae(100);Hyphomicrobium(100);
Otu00025	6877	Bacteria(100);"Verrucomicrobia"(100);Spartobacteria(100);Spartobacteria_order_incertae_sedis(100);Spartobacteria_family_incertae_sedis(100);Spartobacteria_genera_incertae_sedis(100);
Otu00026	6464	Bacteria(100);"Proteobacteria"(100);Gammaproteobacteria(100);Pseudomonadales(100);Pseudomonadaceae(100);Pseudomonas(100);
Otu00027	6226	Bacteria(100);"Proteobacteria"(100);Betaproteobacteria(100);Burkholderiales(100);Alcaligenaceae(100);unclassified(90);
Otu00028	6194	Bacteria(100);"Planctomycetes"(100);"Planctomycetacia"(100);Planctomycetales(100);Planctomycetaceae(100);Planctomyces(100);
Otu00029	5849	Bacteria(100);"Acidobacteria"(100);Acidobacteria_Gp6(100);Acidobacteria_Gp6_order_incertae_sedis(100);Acidobacteria_Gp6_family_incertae_sedis(100);Gp6(100);
Otu00030	5458	Bacteria(100);"Bacteroidetes"(100);Flavobacteria(100);"Flavobacteriales"(100);Flavobacteriaceae(100);Flavobacterium(100);
Otu00031	5427	Bacteria(100);"Bacteroidetes"(100);"Sphingobacteria"(100);"Sphingobacteriales"(100);Chitinophagaceae(100);Terrimonas(100);
Otu00032	5261	Bacteria(100);"Proteobacteria"(100);Gammaproteobacteria(100);Pseudomonadales(100);Pseudomonadaceae(100);Pseudomonas(100);
Otu00033	5044	Bacteria(100);"Proteobacteria"(100);Betaproteobacteria(100);Burkholderiales(100);Alcaligenaceae(100);unclassified(100);
Otu00034	5036	Bacteria(100);"Proteobacteria"(100);Gammaproteobacteria(100);unclassified(100);unclassified(100);unclassified(100);
Otu00035	4959	Bacteria(100);"Proteobacteria"(100);Alphaproteobacteria(100);Rhizobiales(100);Hyphomicrobiaceae(100);Pedomicrobium(94);
Otu00036	4956	Bacteria(100);"Actinobacteria"(100);Actinobacteria(100);Actinomycetales(100);Mycobacteriaceae(100);Mycobacterium(100);
Otu00037	4915	Bacteria(100);"Proteobacteria"(100);Alphaproteobacteria(100);Rhizobiales(100);Xanthobacteraceae(93);unclassified(92);
Otu00038	4502	Bacteria(100);"Verrucomicrobia"(100);Verrucomicrobiae(100);Verrucomicrobiales(100);Verrucomicrobiaceae(100);Prosthecobacter(100);
Otu00039	4479	Bacteria(100);"Verrucomicrobia"(100);Subdivision3(100);Subdivision3_order_incertae_sedis(100);Subdivision3_family_incertae_sedis(100);3_genus_incertae_sedis(100);
Otu00040	4400	Bacteria(100);"Actinobacteria"(100);Actinobacteria(100);Actinomycetales(100);Micrococcaceae(100);Arthrobacter(91);
Otu00041	4259	Bacteria(100);"Verrucomicrobia"(100);Spartobacteria(100);Spartobacteria_order_incertae_sedis(100);Spartobacteria_family_incertae_sedis(100);Spartobacteria_genera_incertae_sedis(100);
Otu00042	4245	Bacteria(100);"Acidobacteria"(100);Acidobacteria_Gp6(100);Acidobacteria_Gp6_order_incertae_sedis(100);Acidobacteria_Gp6_family_incertae_sedis(100);Gp6(100);
Otu00043	4170	Bacteria(100);"Proteobacteria"(100);Betaproteobacteria(100);Burkholderiales(100);Oxalobacteraceae(100);Massilia(93);
Otu00044	4050	Bacteria(100);"Proteobacteria"(100);Betaproteobacteria(100);Nitrosomonadales(100);Nitrosomonadaceae(100);Nitrosospira(100);
Otu00045	3979	Bacteria(100);"Acidobacteria"(100);Acidobacteria_Gp4(100);Acidobacteria_Gp4_order_incertae_sedis(100);Acidobacteria_Gp4_family_incertae_sedis(100);Gp4(100);
Otu00046	3801	Bacteria(100);unclassified(100);unclassified(100);unclassified(100);unclassified(100);unclassified(100);
Otu00047	3651	Bacteria(100);"Acidobacteria"(100);Acidobacteria_Gp6(100);Acidobacteria_Gp6_order_incertae_sedis(100);Acidobacteria_Gp6_family_incertae_sedis(100);Gp6(100);
Otu00048	3639	Bacteria(100);"Acidobacteria"(98);Acidobacteria_Gp6(98);Acidobacteria_Gp6_order_incertae_sedis(98);Acidobacteria_Gp6_family_incertae_sedis(98);Gp6(98);
Otu00049	3494	Bacteria(100);"Acidobacteria"(100);Acidobacteria_Gp3(100);Acidobacteria_Gp3_order_incertae_sedis(100);Acidobacteria_Gp3_family_incertae_sedis(100);Gp3(100);
Otu00050	3420	Bacteria(100);"Acidobacteria"(100);Acidobacteria_Gp6(100);Acidobacteria_Gp6_order_incertae_sedis(100);Acidobacteria_Gp6_family_incertae_sedis(100);Gp6(100);
Otu00051	3378	Bacteria(100);"Verrucomicrobia"(100);Spartobacteria(100);Spartobacteria_order_incertae_sedis(100);Spartobacteria_family_incertae_sedis(100);Spartobacteria_genera_incertae_sedis(100);
Otu00052	3358	Bacteria(100);"Proteobacteria"(100);Betaproteobacteria(100);Burkholderiales(88);Oxalobacteraceae(88);unclassified(100);
Otu00053	3317	Bacteria(100);"Proteobacteria"(100);Gammaproteobacteria(100);Xanthomonadales(100);Sinobacteraceae(100);Steroidobacter(100);
Otu00054	3283	Bacteria(100);"Acidobacteria"(92);Acidobacteria_Gp4(92);Acidobacteria_Gp4_order_incertae_sedis(92);Acidobacteria_Gp4_family_incertae_sedis(92);Gp4(92);
Otu00055	3162	Bacteria(100);"Proteobacteria"(100);Alphaproteobacteria(100);Alphaproteobacteria_order_incertae_sedis(100);Alphaproteobacteria_family_incertae_sedis(100);Rhizomicrobium(100);
Otu00056	3114	Bacteria(100);unclassified(100);unclassified(100);unclassified(100);unclassified(100);unclassified(100);
Otu00057	3099	Bacteria(100);"Gemmatimonadetes"(99);Gemmatimonadetes(99);Gemmatimonadales(99);Gemmatimonadaceae(99);Gemmatimonas(99);
Otu00058	3096	Bacteria(100);"Bacteroidetes"(100);unclassified(100);unclassified(100);unclassified(100);unclassified(100);
Otu00059	3091	Bacteria(100);"Proteobacteria"(100);Betaproteobacteria(100);unclassified(100);unclassified(100);unclassified(100);
Otu00060	3058	Bacteria(100);"Proteobacteria"(100);Alphaproteobacteria(100);unclassified(99);unclassified(99);unclassified(99);
Otu00061	3041	Bacteria(100);"Proteobacteria"(100);Alphaproteobacteria(100);Rhizobiales(100);Rhodobiaceae(100);Parvibaculum(100);
Otu00062	2981	Bacteria(100);"Nitrospira"(100);"Nitrospira"(100);"Nitrospirales"(100);"Nitrospiraceae"(100);Nitrospira(100);
Otu00063	2975	Bacteria(100);"Bacteroidetes"(100);Flavobacteria(100);"Flavobacteriales"(100);Flavobacteriaceae(100);Flavobacterium(100);
Otu00064	2968	Bacteria(100);"Actinobacteria"(100);Actinobacteria(100);Actinomycetales(100);Micromonosporaceae(100);unclassified(100);
Otu00065	2944	Bacteria(100);"Proteobacteria"(100);Alphaproteobacteria(100);Alphaproteobacteria_order_incertae_sedis(82);Alphaproteobacteria_family_incertae_sedis(82);Rhizomicrobium(75);
Otu00066	2906	Bacteria(100);"Nitrospira"(100);"Nitrospira"(100);"Nitrospirales"(100);"Nitrospiraceae"(100);Nitrospira(100);
Otu00067	2878	Bacteria(100);"Acidobacteria"(100);Acidobacteria_Gp6(100);Acidobacteria_Gp6_order_incertae_sedis(100);Acidobacteria_Gp6_family_incertae_sedis(100);Gp6(100);
Otu00068	2769	Bacteria(100);"Actinobacteria"(100);Actinobacteria(100);unclassified(95);unclassified(95);unclassified(95);
Otu00069	2761	Bacteria(100);"Actinobacteria"(100);Actinobacteria(100);Actinomycetales(100);Mycobacteriaceae(100);Mycobacterium(100);
Otu00070	2731	Bacteria(100);"Proteobacteria"(100);Alphaproteobacteria(100);Rhizobiales(100);Hyphomicrobiaceae(100);Devosia(100);
Otu00071	2687	Bacteria(100);"Proteobacteria"(100);Betaproteobacteria(100);Hydrogenophilales(100);Hydrogenophilaceae(100);Thiobacillus(100);
Otu00072	2601	Bacteria(100);"Proteobacteria"(100);Betaproteobacteria(100);Burkholderiales(100);Comamonadaceae(100);unclassified(100);
Otu00073	2581	Bacteria(100);"Proteobacteria"(100);Gammaproteobacteria(100);unclassified(100);unclassified(100);unclassified(100);
Otu00074	2578	Bacteria(100);"Bacteroidetes"(100);Flavobacteria(100);"Flavobacteriales"(100);Flavobacteriaceae(100);unclassified(54);
Otu00075	2577	Bacteria(100);"Acidobacteria"(100);Acidobacteria_Gp6(100);Acidobacteria_Gp6_order_incertae_sedis(100);Acidobacteria_Gp6_family_incertae_sedis(100);Gp6(100);
Otu00076	2575	Bacteria(100);unclassified(100);unclassified(100);unclassified(100);unclassified(100);unclassified(100);
Otu00077	2486	Bacteria(100);unclassified(66);unclassified(66);unclassified(66);unclassified(66);unclassified(66);
Otu00078	2447	Bacteria(100);"Actinobacteria"(100);Actinobacteria(100);Actinomycetales(100);Streptomycetaceae(100);Streptomyces(89);
Otu00079	2433	Bacteria(100);"Acidobacteria"(100);Acidobacteria_Gp6(100);Acidobacteria_Gp6_order_incertae_sedis(100);Acidobacteria_Gp6_family_incertae_sedis(100);Gp6(100);
Otu00080	2421	Bacteria(100);unclassified(100);unclassified(100);unclassified(100);unclassified(100);unclassified(100);
Otu00081	2404	Bacteria(100);unclassified(100);unclassified(100);unclassified(100);unclassified(100);unclassified(100);
Otu00082	2403	Bacteria(100);"Acidobacteria"(100);Acidobacteria_Gp7(100);Acidobacteria_Gp7_order_incertae_sedis(100);Acidobacteria_Gp7_family_incertae_sedis(100);Gp7(100);
Otu00083	2372	Bacteria(100);"Proteobacteria"(100);Betaproteobacteria(100);unclassified(100);unclassified(100);unclassified(100);
Otu00084	2354	Bacteria(100);unclassified(100);unclassified(100);unclassified(100);unclassified(100);unclassified(100);
Otu00085	2312	Bacteria(100);"Proteobacteria"(100);Alphaproteobacteria(100);Sphingomonadales(100);Sphingomonadaceae(100);unclassified(61);
Otu00086	2294	Bacteria(100);unclassified(100);unclassified(100);unclassified(100);unclassified(100);unclassified(100);
Otu00087	2284	Bacteria(100);"Planctomycetes"(99);"Planctomycetacia"(99);Planctomycetales(99);Planctomycetaceae(99);unclassified(63);
Otu00088	2273	Bacteria(100);"Bacteroidetes"(100);"Sphingobacteria"(100);"Sphingobacteriales"(100);Chitinophagaceae(100);unclassified(100);
Otu00089	2247	Bacteria(100);"Proteobacteria"(100);Betaproteobacteria(100);Burkholderiales(100);Comamonadaceae(95);unclassified(62);
Otu00090	2189	Bacteria(100);"Actinobacteria"(100);Actinobacteria(100);Actinomycetales(100);Micromonosporaceae(100);unclassified(80);
Otu00091	2138	Bacteria(100);"Proteobacteria"(100);Alphaproteobacteria(100);Rhizobiales(100);unclassified(100);unclassified(100);
Otu00092	2121	Bacteria(100);"Chloroflexi"(100);unclassified(100);unclassified(100);unclassified(100);unclassified(100);
Otu00093	2098	Bacteria(100);unclassified(100);unclassified(100);unclassified(100);unclassified(100);unclassified(100);
Otu00094	2096	Bacteria(100);"Acidobacteria"(100);Acidobacteria_Gp6(100);Acidobacteria_Gp6_order_incertae_sedis(100);Acidobacteria_Gp6_family_incertae_sedis(100);Gp6(100);
Otu00095	2092	Bacteria(100);"Bacteroidetes"(100);"Sphingobacteria"(100);"Sphingobacteriales"(100);Chitinophagaceae(100);unclassified(99);
Otu00096	2088	Bacteria(100);"Acidobacteria"(100);Acidobacteria_Gp4(99);Acidobacteria_Gp4_order_incertae_sedis(99);Acidobacteria_Gp4_family_incertae_sedis(99);Gp4(99);
Otu00097	2077	Bacteria(100);"Verrucomicrobia"(100);Spartobacteria(100);Spartobacteria_order_incertae_sedis(100);Spartobacteria_family_incertae_sedis(100);Spartobacteria_genera_incertae_sedis(100);
Otu00098	2076	Bacteria(100);"Proteobacteria"(100);Betaproteobacteria(70);unclassified(70);unclassified(70);unclassified(70);
Otu00099	2074	Bacteria(100);"Acidobacteria"(100);Acidobacteria_Gp22(100);Acidobacteria_Gp22_order_incertae_sedis(100);Acidobacteria_Gp22_family_incertae_sedis(100);Gp22(100);
Otu00100	2072	Bacteria(100);Firmicutes(100);Bacilli(100);Bacillales(100);Planococcaceae(84);unclassified(100);
Otu00101	2009	Bacteria(100);"Acidobacteria"(100);Acidobacteria_Gp6(100);Acidobacteria_Gp6_order_incertae_sedis(100);Acidobacteria_Gp6_family_incertae_sedis(100);Gp6(100);
Otu00102	1915	Bacteria(100);"Proteobacteria"(100);Alphaproteobacteria(100);unclassified(100);unclassified(100);unclassified(100);
Otu00103	1911	Bacteria(100);"Verrucomicrobia"(100);Subdivision3(100);Subdivision3_order_incertae_sedis(100);Subdivision3_family_incertae_sedis(100);3_genus_incertae_sedis(100);
Otu00104	1911	Bacteria(100);"Proteobacteria"(100);Gammaproteobacteria(100);unclassified(100);unclassified(100);unclassified(100);
Otu00105	1894	Bacteria(100);"Proteobacteria"(100);Alphaproteobacteria(100);Rhizobiales(100);Hyphomicrobiaceae(100);Hyphomicrobium(100);
Otu00106	1883	Bacteria(100);"Acidobacteria"(100);Acidobacteria_Gp1(100);Acidobacteria_Gp1_order_incertae_sedis(100);Acidobacteria_Gp1_family_incertae_sedis(100);Gp1(100);
Otu00107	1881	Bacteria(100);unclassified(100);unclassified(100);unclassified(100);unclassified(100);unclassified(100);
Otu00108	1875	Bacteria(100);unclassified(100);unclassified(100);unclassified(100);unclassified(100);unclassified(100);
Otu00109	1871	Bacteria(100);unclassified(100);unclassified(100);unclassified(100);unclassified(100);unclassified(100);
Otu00110	1857	Bacteria(100);"Proteobacteria"(100);Alphaproteobacteria(100);unclassified(93);unclassified(93);unclassified(93);
Otu00111	1847	Bacteria(100);"Acidobacteria"(100);Acidobacteria_Gp6(100);Acidobacteria_Gp6_order_incertae_sedis(100);Acidobacteria_Gp6_family_incertae_sedis(100);Gp6(100);
Otu00112	1846	Bacteria(100);unclassified(100);unclassified(100);unclassified(100);unclassified(100);unclassified(100);
Otu00113	1823	Bacteria(100);"Actinobacteria"(100);Actinobacteria(100);Actinomycetales(100);Nakamurellaceae(97);Humicoccus(79);
Otu00114	1819	Bacteria(100);unclassified(100);unclassified(100);unclassified(100);unclassified(100);unclassified(100);
Otu00115	1783	Bacteria(100);"Acidobacteria"(100);Acidobacteria_Gp1(100);Acidobacteria_Gp1_order_incertae_sedis(100);Acidobacteria_Gp1_family_incertae_sedis(100);Gp1(100);
Otu00116	1739	Bacteria(100);unclassified(100);unclassified(100);unclassified(100);unclassified(100);unclassified(100);
Otu00117	1733	Bacteria(100);"Acidobacteria"(100);Acidobacteria_Gp6(100);Acidobacteria_Gp6_order_incertae_sedis(100);Acidobacteria_Gp6_family_incertae_sedis(100);Gp6(100);
Otu00118	1716	Bacteria(100);"Proteobacteria"(100);Betaproteobacteria(100);unclassified(100);unclassified(100);unclassified(100);
Otu00119	1698	Bacteria(100);"Actinobacteria"(100);Actinobacteria(100);Solirubrobacterales(100);Solirubrobacteraceae(100);Solirubrobacter(100);
Otu00120	1667	Bacteria(100);"Proteobacteria"(100);Alphaproteobacteria(100);Rhodospirillales(100);Acetobacteraceae(100);unclassified(100);
Otu00121	1654	Bacteria(100);"Bacteroidetes"(100);"Sphingobacteria"(100);"Sphingobacteriales"(100);Sphingobacteriaceae(100);Mucilaginibacter(57);
Otu00122	1644	Bacteria(100);"Actinobacteria"(100);Actinobacteria(100);Actinomycetales(100);Micromonosporaceae(100);unclassified(94);
Otu00123	1608	Bacteria(100);"Proteobacteria"(100);Alphaproteobacteria(100);Alphaproteobacteria_order_incertae_sedis(90);Alphaproteobacteria_family_incertae_sedis(90);Rhizomicrobium(87);
Otu00124	1587	Bacteria(100);"Planctomycetes"(100);"Planctomycetacia"(100);Planctomycetales(100);Planctomycetaceae(100);Singulisphaera(100);
Otu00125	1583	Bacteria(100);"Proteobacteria"(100);Alphaproteobacteria(100);Sphingomonadales(100);Sphingomonadaceae(100);Sphingomonas(83);
Otu00126	1583	Bacteria(100);unclassified(100);unclassified(100);unclassified(100);unclassified(100);unclassified(100);
Otu00127	1551	Bacteria(100);unclassified(100);unclassified(100);unclassified(100);unclassified(100);unclassified(100);
Otu00128	1547	Bacteria(100);unclassified(100);unclassified(100);unclassified(100);unclassified(100);unclassified(100);
Otu00129	1533	Bacteria(100);"Proteobacteria"(100);unclassified(100);unclassified(100);unclassified(100);unclassified(100);
Otu00130	1532	Bacteria(100);unclassified(100);unclassified(100);unclassified(100);unclassified(100);unclassified(100);
Otu00131	1531	Bacteria(100);"Proteobacteria"(100);Alphaproteobacteria(100);unclassified(100);unclassified(100);unclassified(100);
Otu00132	1531	Bacteria(100);"Proteobacteria"(100);Alphaproteobacteria(100);Rhodospirillales(100);Acetobacteraceae(100);unclassified(100);
Otu00133	1497	Bacteria(100);unclassified(100);unclassified(100);unclassified(100);unclassified(100);unclassified(100);
Otu00134	1496	Bacteria(100);"Bacteroidetes"(100);"Sphingobacteria"(100);"Sphingobacteriales"(100);Sphingobacteriaceae(100);unclassified(92);
Otu00135	1493	Bacteria(100);"Bacteroidetes"(100);"Sphingobacteria"(100);"Sphingobacteriales"(100);Chitinophagaceae(100);Terrimonas(76);
Otu00136	1473	Bacteria(100);"Proteobacteria"(100);Betaproteobacteria(100);Burkholderiales(100);Oxalobacteraceae(100);unclassified(100);
Otu00137	1466	Bacteria(100);"Verrucomicrobia"(100);Subdivision3(100);Subdivision3_order_incertae_sedis(100);Subdivision3_family_incertae_sedis(100);3_genus_incertae_sedis(100);
Otu00138	1457	Bacteria(100);"Acidobacteria"(100);Acidobacteria_Gp1(100);Acidobacteria_Gp1_order_incertae_sedis(100);Acidobacteria_Gp1_family_incertae_sedis(100);Gp1(100);
Otu00139	1457	Bacteria(100);"Verrucomicrobia"(100);Subdivision3(100);Subdivision3_order_incertae_sedis(100);Subdivision3_family_incertae_sedis(100);3_genus_incertae_sedis(100);
Otu00140	1446	Bacteria(100);"Proteobacteria"(100);Deltaproteobacteria(100);Myxococcales(100);unclassified(93);unclassified(93);
Otu00141	1444	Bacteria(100);"Acidobacteria"(100);Acidobacteria_Gp7(100);Acidobacteria_Gp7_order_incertae_sedis(100);Acidobacteria_Gp7_family_incertae_sedis(100);Gp7(100);
Otu00142	1442	Bacteria(100);unclassified(100);unclassified(100);unclassified(100);unclassified(100);unclassified(100);
Otu00143	1441	Bacteria(100);unclassified(76);unclassified(76);unclassified(76);unclassified(76);unclassified(76);
Otu00144	1388	Bacteria(100);"Proteobacteria"(100);Deltaproteobacteria(100);Myxococcales(57);unclassified(57);unclassified(57);
Otu00145	1367	Bacteria(100);"Actinobacteria"(100);Actinobacteria(100);unclassified(100);unclassified(100);unclassified(100);
Otu00146	1367	Bacteria(100);unclassified(100);unclassified(100);unclassified(100);unclassified(100);unclassified(100);
Otu00147	1366	Bacteria(100);"Proteobacteria"(100);Betaproteobacteria(53);Burkholderiales(53);unclassified(100);unclassified(100);
Otu00148	1364	Bacteria(100);"Proteobacteria"(100);Betaproteobacteria(100);unclassified(100);unclassified(100);unclassified(100);
Otu00149	1354	Bacteria(100);"Proteobacteria"(100);Alphaproteobacteria(100);Rhizobiales(100);Phyllobacteriaceae(89);Mesorhizobium(89);
Otu00150	1352	Bacteria(100);"Actinobacteria"(100);Actinobacteria(100);Actinomycetales(100);Nocardioidaceae(100);unclassified(52);
Otu00151	1351	Bacteria(100);"Actinobacteria"(72);Actinobacteria(72);unclassified(72);unclassified(72);unclassified(72);
Otu00152	1347	Bacteria(100);"Acidobacteria"(100);Acidobacteria_Gp6(100);Acidobacteria_Gp6_order_incertae_sedis(100);Acidobacteria_Gp6_family_incertae_sedis(100);Gp6(100);
Otu00153	1339	Bacteria(100);"Proteobacteria"(100);Gammaproteobacteria(100);Xanthomonadales(100);Xanthomonadaceae(100);Arenimonas(100);
Otu00154	1321	Bacteria(100);"Proteobacteria"(100);Betaproteobacteria(100);unclassified(99);unclassified(99);unclassified(99);
Otu00155	1314	Bacteria(100);"Proteobacteria"(100);unclassified(100);unclassified(100);unclassified(100);unclassified(100);
Otu00156	1302	Bacteria(100);unclassified(100);unclassified(100);unclassified(100);unclassified(100);unclassified(100);
Otu00157	1289	Bacteria(100);unclassified(100);unclassified(100);unclassified(100);unclassified(100);unclassified(100);
Otu00158	1285	Bacteria(100);unclassified(73);unclassified(73);unclassified(73);unclassified(73);unclassified(73);
Otu00159	1278	Bacteria(100);"Acidobacteria"(100);Acidobacteria_Gp6(100);Acidobacteria_Gp6_order_incertae_sedis(100);Acidobacteria_Gp6_family_incertae_sedis(100);Gp6(100);
Otu00160	1272	Bacteria(100);unclassified(100);unclassified(100);unclassified(100);unclassified(100);unclassified(100);
Otu00161	1266	Bacteria(100);"Acidobacteria"(100);Acidobacteria_Gp4(100);Acidobacteria_Gp4_order_incertae_sedis(100);Acidobacteria_Gp4_family_incertae_sedis(100);Gp4(100);
Otu00162	1254	Bacteria(100);unclassified(100);unclassified(100);unclassified(100);unclassified(100);unclassified(100);
Otu00163	1254	Bacteria(100);"Proteobacteria"(100);Alphaproteobacteria(100);Caulobacterales(100);Caulobacteraceae(100);Phenylobacterium(100);
Otu00164	1236	Bacteria(100);"Proteobacteria"(100);Betaproteobacteria(100);unclassified(100);unclassified(100);unclassified(100);
Otu00165	1234	Bacteria(100);Firmicutes(100);Bacilli(100);Bacillales(100);Pasteuriaceae(100);Pasteuria(100);
Otu00166	1232	Bacteria(100);"Actinobacteria"(100);Actinobacteria(100);Actinomycetales(100);Nocardioidaceae(100);Kribbella(100);
Otu00167	1230	Bacteria(100);"Proteobacteria"(100);Deltaproteobacteria(100);Myxococcales(100);unclassified(100);unclassified(100);
Otu00168	1225	Bacteria(100);"Acidobacteria"(100);Acidobacteria_Gp6(100);Acidobacteria_Gp6_order_incertae_sedis(100);Acidobacteria_Gp6_family_incertae_sedis(100);Gp6(100);
Otu00169	1224	Bacteria(100);"Acidobacteria"(100);Acidobacteria_Gp3(100);Acidobacteria_Gp3_order_incertae_sedis(100);Acidobacteria_Gp3_family_incertae_sedis(100);Gp3(100);
Otu00170	1224	Bacteria(100);"Planctomycetes"(100);"Planctomycetacia"(100);Planctomycetales(100);Planctomycetaceae(100);unclassified(100);
Otu00171	1212	Bacteria(100);"Nitrospira"(100);"Nitrospira"(100);"Nitrospirales"(100);"Nitrospiraceae"(100);Nitrospira(100);
Otu00172	1211	Bacteria(100);"Actinobacteria"(100);Actinobacteria(100);unclassified(100);unclassified(100);unclassified(100);
Otu00173	1200	Bacteria(100);"Bacteroidetes"(100);"Sphingobacteria"(100);"Sphingobacteriales"(100);Chitinophagaceae(100);Terrimonas(100);
Otu00174	1194	Bacteria(100);"Proteobacteria"(100);Alphaproteobacteria(100);unclassified(100);unclassified(100);unclassified(100);
Otu00175	1178	Bacteria(100);"Verrucomicrobia"(100);Spartobacteria(100);Spartobacteria_order_incertae_sedis(100);Spartobacteria_family_incertae_sedis(100);Spartobacteria_genera_incertae_sedis(100);
Otu00176	1178	Bacteria(100);"Chloroflexi"(100);Anaerolineae(100);Anaerolineales(100);Anaerolineaceae(100);Levilinea(100);
Otu00177	1143	Bacteria(100);"Actinobacteria"(100);Actinobacteria(100);Actinomycetales(100);Intrasporangiaceae(100);unclassified(100);
Otu00178	1140	Bacteria(100);"Acidobacteria"(100);Acidobacteria_Gp3(100);Acidobacteria_Gp3_order_incertae_sedis(100);Acidobacteria_Gp3_family_incertae_sedis(100);Gp3(100);
Otu00179	1129	Bacteria(100);unclassified(100);unclassified(100);unclassified(100);unclassified(100);unclassified(100);
Otu00180	1120	Bacteria(100);"Acidobacteria"(100);Acidobacteria_Gp6(100);Acidobacteria_Gp6_order_incertae_sedis(100);Acidobacteria_Gp6_family_incertae_sedis(100);Gp6(100);
Otu00181	1118	Bacteria(100);"Proteobacteria"(100);Deltaproteobacteria(100);Myxococcales(100);unclassified(53);unclassified(53);
Otu00182	1113	Bacteria(100);"Acidobacteria"(99);Acidobacteria_Gp16(99);Acidobacteria_Gp16_order_incertae_sedis(99);Acidobacteria_Gp16_family_incertae_sedis(99);Gp16(99);
Otu00183	1101	Bacteria(100);"Acidobacteria"(100);Acidobacteria_Gp6(100);Acidobacteria_Gp6_order_incertae_sedis(100);Acidobacteria_Gp6_family_incertae_sedis(100);Gp6(100);
Otu00184	1098	Bacteria(100);unclassified(100);unclassified(100);unclassified(100);unclassified(100);unclassified(100);
Otu00185	1095	Bacteria(100);Firmicutes(100);unclassified(100);unclassified(100);unclassified(100);unclassified(100);
Otu00186	1089	Bacteria(100);"Acidobacteria"(100);Acidobacteria_Gp3(100);Acidobacteria_Gp3_order_incertae_sedis(100);Acidobacteria_Gp3_family_incertae_sedis(100);Gp3(100);
Otu00187	1083	Bacteria(100);unclassified(100);unclassified(100);unclassified(100);unclassified(100);unclassified(100);
Otu00188	1077	Bacteria(100);"Proteobacteria"(100);Alphaproteobacteria(100);Rhizobiales(100);Phyllobacteriaceae(100);Mesorhizobium(95);
Otu00189	1070	Bacteria(100);unclassified(100);unclassified(100);unclassified(100);unclassified(100);unclassified(100);
Otu00190	1067	Bacteria(100);"Actinobacteria"(100);Actinobacteria(100);Acidimicrobiales(93);unclassified(100);unclassified(100);
Otu00191	1060	Bacteria(100);"Actinobacteria"(100);Actinobacteria(100);Acidimicrobiales(93);unclassified(93);unclassified(93);
Otu00192	1045	Bacteria(100);"Proteobacteria"(100);Betaproteobacteria(100);unclassified(100);unclassified(100);unclassified(100);
Otu00193	1043	Bacteria(100);"Acidobacteria"(100);Acidobacteria_Gp6(100);Acidobacteria_Gp6_order_incertae_sedis(100);Acidobacteria_Gp6_family_incertae_sedis(100);Gp6(100);
Otu00194	1039	Bacteria(100);"Actinobacteria"(100);Actinobacteria(100);unclassified(60);unclassified(60);unclassified(60);
Otu00195	1032	Bacteria(100);"Planctomycetes"(100);"Planctomycetacia"(100);Planctomycetales(100);Planctomycetaceae(100);unclassified(65);
Otu00196	1025	Bacteria(100);"Verrucomicrobia"(100);Subdivision3(100);Subdivision3_order_incertae_sedis(100);Subdivision3_family_incertae_sedis(100);3_genus_incertae_sedis(100);
Otu00197	1023	Bacteria(100);"Bacteroidetes"(100);"Sphingobacteria"(100);"Sphingobacteriales"(100);Chitinophagaceae(100);unclassified(100);
Otu00198	1005	Bacteria(100);"Chloroflexi"(91);Anaerolineae(91);Anaerolineales(91);Anaerolineaceae(91);unclassified(91);
Otu00199	1000	Bacteria(100);"Planctomycetes"(95);"Planctomycetacia"(95);Planctomycetales(95);Planctomycetaceae(95);unclassified(85);
Otu00200	990	Bacteria(100);"Acidobacteria"(100);Acidobacteria_Gp16(100);Acidobacteria_Gp16_order_incertae_sedis(100);Acidobacteria_Gp16_family_incertae_sedis(100);Gp16(100);
Otu00201	986	Bacteria(100);"Proteobacteria"(100);Gammaproteobacteria(100);unclassified(100);unclassified(100);unclassified(100);
Otu00202	985	Bacteria(100);"Proteobacteria"(100);Alphaproteobacteria(100);Rhizobiales(100);Methylobacteriaceae(100);Microvirga(98);
Otu00203	983	Bacteria(100);"Gemmatimonadetes"(100);Gemmatimonadetes(100);Gemmatimonadales(100);Gemmatimonadaceae(100);Gemmatimonas(100);
Otu00204	983	Bacteria(100);"Proteobacteria"(100);Alphaproteobacteria(100);Rhizobiales(98);Phyllobacteriaceae(98);Mesorhizobium(98);
Otu00205	981	Bacteria(100);"Acidobacteria"(100);Acidobacteria_Gp4(100);Acidobacteria_Gp4_order_incertae_sedis(100);Acidobacteria_Gp4_family_incertae_sedis(100);Gp4(100);
Otu00206	980	Bacteria(100);unclassified(100);unclassified(100);unclassified(100);unclassified(100);unclassified(100);
Otu00207	975	Bacteria(100);"Proteobacteria"(100);Gammaproteobacteria(100);unclassified(100);unclassified(100);unclassified(100);
Otu00208	964	Bacteria(100);"Planctomycetes"(100);"Planctomycetacia"(100);Planctomycetales(100);Planctomycetaceae(100);Singulisphaera(100);
Otu00209	960	Bacteria(100);"Verrucomicrobia"(100);Spartobacteria(100);Spartobacteria_order_incertae_sedis(100);Spartobacteria_family_incertae_sedis(100);Spartobacteria_genera_incertae_sedis(100);
Otu00210	958	Bacteria(100);unclassified(100);unclassified(100);unclassified(100);unclassified(100);unclassified(100);
Otu00211	955	Bacteria(100);unclassified(100);unclassified(100);unclassified(100);unclassified(100);unclassified(100);
Otu00212	950	Bacteria(100);"Bacteroidetes"(100);unclassified(93);unclassified(93);unclassified(93);unclassified(93);
Otu00213	946	Bacteria(100);"Proteobacteria"(100);Betaproteobacteria(100);unclassified(100);unclassified(100);unclassified(100);
Otu00214	944	Bacteria(100);"Acidobacteria"(100);Acidobacteria_Gp7(100);Acidobacteria_Gp7_order_incertae_sedis(100);Acidobacteria_Gp7_family_incertae_sedis(100);Gp7(100);
Otu00215	943	Bacteria(100);"Acidobacteria"(100);Acidobacteria_Gp11(100);Acidobacteria_Gp11_order_incertae_sedis(100);Acidobacteria_Gp11_family_incertae_sedis(100);Gp11(100);
Otu00216	937	Bacteria(100);"Planctomycetes"(100);"Planctomycetacia"(100);Planctomycetales(100);Planctomycetaceae(100);Planctomyces(100);
Otu00217	929	Bacteria(100);"Bacteroidetes"(100);Flavobacteria(100);"Flavobacteriales"(100);Flavobacteriaceae(100);Flavobacterium(100);
Otu00218	926	Bacteria(100);"Bacteroidetes"(100);Flavobacteria(100);"Flavobacteriales"(100);Flavobacteriaceae(100);Yeosuana(80);
Otu00219	925	Bacteria(100);"Actinobacteria"(100);Actinobacteria(100);Actinomycetales(100);Microbacteriaceae(100);Leucobacter(100);
Otu00220	924	Bacteria(100);"Verrucomicrobia"(100);Verrucomicrobiae(100);Verrucomicrobiales(100);Verrucomicrobiaceae(100);Luteolibacter(100);
Otu00221	923	Bacteria(100);"Actinobacteria"(100);Actinobacteria(100);Acidimicrobiales(100);unclassified(100);unclassified(100);
Otu00222	919	Bacteria(100);unclassified(100);unclassified(100);unclassified(100);unclassified(100);unclassified(100);
Otu00223	915	Bacteria(100);WS3(85);WS3_class_incertae_sedis(85);WS3_order_incertae_sedis(85);WS3_family_incertae_sedis(85);WS3_genus_incertae_sedis(85);
Otu00224	907	Bacteria(100);Firmicutes(100);Clostridia(100);Clostridiales(100);Clostridiaceae_1(100);Clostridium_sensu_stricto(100);
Otu00225	905	Bacteria(100);"Proteobacteria"(100);Betaproteobacteria(100);Rhodocyclales(58);Rhodocyclaceae(58);unclassified(58);
Otu00226	905	Bacteria(100);"Proteobacteria"(100);Alphaproteobacteria(100);Rhodospirillales(100);Rhodospirillaceae(100);unclassified(100);
Otu00227	900	Bacteria(100);unclassified(100);unclassified(100);unclassified(100);unclassified(100);unclassified(100);
Otu00228	892	Bacteria(100);"Gemmatimonadetes"(100);Gemmatimonadetes(100);Gemmatimonadales(100);Gemmatimonadaceae(100);Gemmatimonas(100);
Otu00229	891	Bacteria(100);Firmicutes(100);Bacilli(100);Bacillales(100);Pasteuriaceae(100);Pasteuria(100);
Otu00230	886	Bacteria(100);"Proteobacteria"(92);Deltaproteobacteria(91);unclassified(91);unclassified(91);unclassified(91);
Otu00231	885	Bacteria(100);"Acidobacteria"(100);Acidobacteria_Gp4(100);Acidobacteria_Gp4_order_incertae_sedis(100);Acidobacteria_Gp4_family_incertae_sedis(100);Gp4(100);
Otu00232	883	Bacteria(100);"Proteobacteria"(100);Alphaproteobacteria(100);Rhizobiales(100);Hyphomicrobiaceae(100);unclassified(100);
Otu00233	881	Bacteria(100);"Proteobacteria"(100);unclassified(90);unclassified(90);unclassified(90);unclassified(90);
Otu00234	880	Bacteria(100);"Proteobacteria"(100);Alphaproteobacteria(100);unclassified(95);unclassified(95);unclassified(95);
Otu00235	878	Bacteria(100);"Proteobacteria"(100);Alphaproteobacteria(100);unclassified(100);unclassified(100);unclassified(100);
Otu00236	869	Bacteria(100);"Bacteroidetes"(100);"Bacteroidetes"_incertae_sedis_class_incertae_sedis(100);"Bacteroidetes"_incertae_sedis_order_incertae_sedis(100);"Bacteroidetes"_incertae_sedis_family_incertae_sedis(100);Ohtaekwangia(100);
Otu00237	866	Bacteria(100);"Proteobacteria"(96);unclassified(64);unclassified(64);unclassified(64);unclassified(64);
Otu00238	866	Bacteria(100);"Actinobacteria"(100);Actinobacteria(100);Actinomycetales(100);Pseudonocardiaceae(100);Pseudonocardia(100);
Otu00239	861	Bacteria(100);"Proteobacteria"(100);Gammaproteobacteria(100);Xanthomonadales(100);Xanthomonadaceae(100);Luteimonas(91);
Otu00240	858	Bacteria(100);unclassified(91);unclassified(91);unclassified(91);unclassified(91);unclassified(91);
Otu00241	858	Bacteria(100);unclassified(100);unclassified(100);unclassified(100);unclassified(100);unclassified(100);
Otu00242	848	Bacteria(100);"Acidobacteria"(100);Acidobacteria_Gp16(100);Acidobacteria_Gp16_order_incertae_sedis(100);Acidobacteria_Gp16_family_incertae_sedis(100);Gp16(100);
Otu00243	831	Bacteria(100);"Proteobacteria"(100);Betaproteobacteria(100);unclassified(92);unclassified(92);unclassified(92);
Otu00244	828	Bacteria(100);"Bacteroidetes"(100);"Sphingobacteria"(100);"Sphingobacteriales"(100);Cytophagaceae(100);Adhaeribacter(100);
Otu00245	827	Bacteria(100);"Actinobacteria"(100);Actinobacteria(100);unclassified(100);unclassified(100);unclassified(100);
Otu00246	826	Bacteria(100);"Verrucomicrobia"(100);Spartobacteria(100);Spartobacteria_order_incertae_sedis(100);Spartobacteria_family_incertae_sedis(100);Spartobacteria_genera_incertae_sedis(100);
Otu00247	820	Bacteria(100);unclassified(100);unclassified(100);unclassified(100);unclassified(100);unclassified(100);
Otu00248	804	Bacteria(100);unclassified(100);unclassified(100);unclassified(100);unclassified(100);unclassified(100);
Otu00249	801	Bacteria(100);"Proteobacteria"(100);Betaproteobacteria(100);unclassified(100);unclassified(100);unclassified(100);
Otu00250	799	Bacteria(100);"Acidobacteria"(100);Acidobacteria_Gp5(100);Acidobacteria_Gp5_order_incertae_sedis(100);Acidobacteria_Gp5_family_incertae_sedis(100);Gp5(100);
Otu00251	796	Bacteria(100);"Gemmatimonadetes"(100);Gemmatimonadetes(100);Gemmatimonadales(100);Gemmatimonadaceae(100);Gemmatimonas(100);
Otu00252	791	Bacteria(100);"Acidobacteria"(100);Acidobacteria_Gp5(100);Acidobacteria_Gp5_order_incertae_sedis(100);Acidobacteria_Gp5_family_incertae_sedis(100);Gp5(100);
Otu00253	788	Bacteria(100);"Bacteroidetes"(100);Flavobacteria(100);"Flavobacteriales"(100);Cryomorphaceae(100);unclassified(100);
Otu00254	786	Bacteria(100);unclassified(100);unclassified(100);unclassified(100);unclassified(100);unclassified(100);
Otu00255	784	Bacteria(100);unclassified(100);unclassified(100);unclassified(100);unclassified(100);unclassified(100);
Otu00256	782	Bacteria(100);unclassified(100);unclassified(100);unclassified(100);unclassified(100);unclassified(100);
Otu00257	782	Bacteria(100);unclassified(100);unclassified(100);unclassified(100);unclassified(100);unclassified(100);
Otu00258	781	Bacteria(100);unclassified(99);unclassified(99);unclassified(99);unclassified(99);unclassified(99);
Otu00259	776	Bacteria(100);"Actinobacteria"(100);Actinobacteria(100);Acidimicrobiales(86);unclassified(86);unclassified(86);
Otu00260	774	Bacteria(100);Firmicutes(100);Bacilli(100);Bacillales(100);Pasteuriaceae(100);Pasteuria(100);
Otu00261	766	Bacteria(100);unclassified(100);unclassified(100);unclassified(100);unclassified(100);unclassified(100);
Otu00262	764	Bacteria(100);"Proteobacteria"(100);Alphaproteobacteria(54);Rhizobiales(54);unclassified(100);unclassified(100);
Otu00263	761	Bacteria(100);"Planctomycetes"(100);"Planctomycetacia"(100);Planctomycetales(100);Planctomycetaceae(100);Isosphaera(61);
Otu00264	760	Bacteria(100);"Bacteroidetes"(100);Flavobacteria(100);"Flavobacteriales"(100);Flavobacteriaceae(100);unclassified(100);
Otu00265	760	Bacteria(100);"Bacteroidetes"(100);"Sphingobacteria"(100);"Sphingobacteriales"(100);"Flammeovirgaceae"(88);unclassified(66);
Otu00266	758	Bacteria(100);"Actinobacteria"(100);Actinobacteria(100);Actinomycetales(100);Nocardioidaceae(100);Nocardioides(100);
Otu00267	757	Bacteria(100);"Bacteroidetes"(100);"Sphingobacteria"(100);"Sphingobacteriales"(100);Sphingobacteriaceae(100);Pedobacter(100);
Otu00268	752	Bacteria(100);"Bacteroidetes"(100);"Bacteroidetes"_incertae_sedis_class_incertae_sedis(100);"Bacteroidetes"_incertae_sedis_order_incertae_sedis(100);"Bacteroidetes"_incertae_sedis_family_incertae_sedis(100);Ohtaekwangia(100);
Otu00269	750	Bacteria(100);"Actinobacteria"(100);Actinobacteria(100);unclassified(100);unclassified(100);unclassified(100);
Otu00270	749	Bacteria(100);"Bacteroidetes"(100);"Bacteroidetes"_incertae_sedis_class_incertae_sedis(89);"Bacteroidetes"_incertae_sedis_order_incertae_sedis(89);"Bacteroidetes"_incertae_sedis_family_incertae_sedis(89);Ohtaekwangia(89);
Otu00271	745	Bacteria(100);"Proteobacteria"(100);Betaproteobacteria(100);unclassified(100);unclassified(100);unclassified(100);
Otu00272	745	Bacteria(100);unclassified(100);unclassified(100);unclassified(100);unclassified(100);unclassified(100);
Otu00273	739	Bacteria(100);unclassified(94);unclassified(94);unclassified(94);unclassified(94);unclassified(94);
Otu00274	736	Bacteria(100);"Acidobacteria"(100);Acidobacteria_Gp5(100);Acidobacteria_Gp5_order_incertae_sedis(100);Acidobacteria_Gp5_family_incertae_sedis(100);Gp5(100);
Otu00275	734	Bacteria(100);"Acidobacteria"(100);Acidobacteria_Gp3(100);Acidobacteria_Gp3_order_incertae_sedis(100);Acidobacteria_Gp3_family_incertae_sedis(100);Gp3(100);
Otu00276	733	Bacteria(100);"Planctomycetes"(100);"Planctomycetacia"(100);Planctomycetales(100);Planctomycetaceae(100);Planctomyces(99);
Otu00277	730	Bacteria(100);"Actinobacteria"(100);Actinobacteria(100);unclassified(100);unclassified(100);unclassified(100);
Otu00278	729	Bacteria(100);"Verrucomicrobia"(100);Subdivision3(100);Subdivision3_order_incertae_sedis(100);Subdivision3_family_incertae_sedis(100);3_genus_incertae_sedis(100);
Otu00279	727	Bacteria(100);"Acidobacteria"(100);Acidobacteria_Gp22(100);Acidobacteria_Gp22_order_incertae_sedis(100);Acidobacteria_Gp22_family_incertae_sedis(100);Gp22(100);
Otu00280	725	Bacteria(100);unclassified(100);unclassified(100);unclassified(100);unclassified(100);unclassified(100);
Otu00281	725	Bacteria(100);"Actinobacteria"(99);Actinobacteria(99);Solirubrobacterales(97);Conexibacteraceae(95);Conexibacter(95);
Otu00282	724	Bacteria(100);"Proteobacteria"(100);Alphaproteobacteria(100);Rhodospirillales(100);Rhodospirillaceae(100);unclassified(100);
Otu00283	724	Bacteria(100);"Proteobacteria"(100);Betaproteobacteria(100);unclassified(100);unclassified(100);unclassified(100);
Otu00284	724	Bacteria(100);"Proteobacteria"(100);Betaproteobacteria(100);unclassified(56);unclassified(56);unclassified(56);
Otu00285	720	Bacteria(100);Firmicutes(100);Bacilli(100);Bacillales(100);Bacillaceae_1(99);Bacillus(87);
Otu00286	720	Bacteria(100);unclassified(100);unclassified(100);unclassified(100);unclassified(100);unclassified(100);
Otu00287	719	Bacteria(100);unclassified(100);unclassified(100);unclassified(100);unclassified(100);unclassified(100);
Otu00288	709	Bacteria(100);"Gemmatimonadetes"(100);Gemmatimonadetes(100);Gemmatimonadales(100);Gemmatimonadaceae(100);Gemmatimonas(100);
Otu00289	702	Bacteria(100);"Proteobacteria"(100);Betaproteobacteria(100);unclassified(100);unclassified(100);unclassified(100);
Otu00290	700	Bacteria(100);"Verrucomicrobia"(100);Verrucomicrobiae(61);Verrucomicrobiales(61);Verrucomicrobiaceae(61);unclassified(61);
Otu00291	699	Bacteria(100);unclassified(100);unclassified(100);unclassified(100);unclassified(100);unclassified(100);
Otu00292	690	Bacteria(100);"Acidobacteria"(100);Acidobacteria_Gp6(100);Acidobacteria_Gp6_order_incertae_sedis(100);Acidobacteria_Gp6_family_incertae_sedis(100);Gp6(100);
Otu00293	689	Bacteria(100);WS3(95);WS3_class_incertae_sedis(95);WS3_order_incertae_sedis(95);WS3_family_incertae_sedis(95);WS3_genus_incertae_sedis(95);
Otu00294	686	Bacteria(100);unclassified(100);unclassified(100);unclassified(100);unclassified(100);unclassified(100);
Otu00295	685	Bacteria(100);unclassified(100);unclassified(100);unclassified(100);unclassified(100);unclassified(100);
Otu00296	681	Bacteria(100);"Actinobacteria"(100);Actinobacteria(100);Acidimicrobiales(100);Acidimicrobiaceae(100);Ilumatobacter(100);
Otu00297	680	Bacteria(100);"Acidobacteria"(100);Acidobacteria_Gp6(100);Acidobacteria_Gp6_order_incertae_sedis(100);Acidobacteria_Gp6_family_incertae_sedis(100);Gp6(100);
Otu00298	678	Bacteria(100);"Proteobacteria"(100);Alphaproteobacteria(100);Sphingomonadales(100);Sphingomonadaceae(100);Sphingomonas(93);
Otu00299	678	Bacteria(100);"Actinobacteria"(100);Actinobacteria(100);Acidimicrobiales(100);unclassified(98);unclassified(98);
Otu00300	676	Bacteria(100);unclassified(100);unclassified(100);unclassified(100);unclassified(100);unclassified(100);
Otu00301	676	Bacteria(100);"Bacteroidetes"(100);"Sphingobacteria"(100);"Sphingobacteriales"(100);Chitinophagaceae(100);Terrimonas(100);
Otu00302	673	Bacteria(100);"Bacteroidetes"(100);"Sphingobacteria"(100);"Sphingobacteriales"(100);Chitinophagaceae(100);Ferruginibacter(100);
Otu00303	673	Bacteria(100);"Acidobacteria"(100);Acidobacteria_Gp6(100);Acidobacteria_Gp6_order_incertae_sedis(100);Acidobacteria_Gp6_family_incertae_sedis(100);Gp6(100);
Otu00304	673	Bacteria(100);"Actinobacteria"(100);Actinobacteria(100);unclassified(100);unclassified(100);unclassified(100);
Otu00305	667	Bacteria(100);unclassified(99);unclassified(99);unclassified(99);unclassified(99);unclassified(99);
Otu00306	658	Bacteria(100);"Proteobacteria"(100);Gammaproteobacteria(100);Xanthomonadales(100);Xanthomonadaceae(100);unclassified(55);
Otu00307	651	Bacteria(100);unclassified(100);unclassified(100);unclassified(100);unclassified(100);unclassified(100);
Otu00308	649	Bacteria(100);"Acidobacteria"(100);Acidobacteria_Gp4(100);Acidobacteria_Gp4_order_incertae_sedis(100);Acidobacteria_Gp4_family_incertae_sedis(100);Gp4(100);
Otu00309	647	Bacteria(100);"Verrucomicrobia"(100);Verrucomicrobiae(56);Verrucomicrobiales(56);Verrucomicrobiaceae(56);unclassified(56);
Otu00310	645	Bacteria(100);"Actinobacteria"(100);Actinobacteria(100);Actinomycetales(100);Streptomycetaceae(100);Streptomyces(98);
Otu00311	642	Bacteria(100);"Proteobacteria"(100);Betaproteobacteria(100);unclassified(90);unclassified(90);unclassified(90);
Otu00312	642	Bacteria(100);"Acidobacteria"(100);Acidobacteria_Gp4(100);Acidobacteria_Gp4_order_incertae_sedis(100);Acidobacteria_Gp4_family_incertae_sedis(100);Gp4(100);
Otu00313	641	Bacteria(100);"Verrucomicrobia"(100);Subdivision3(100);Subdivision3_order_incertae_sedis(100);Subdivision3_family_incertae_sedis(100);3_genus_incertae_sedis(100);
Otu00314	640	Bacteria(100);"Planctomycetes"(97);"Planctomycetacia"(97);Planctomycetales(97);Planctomycetaceae(97);unclassified(88);
Otu00315	640	Bacteria(100);"Proteobacteria"(51);unclassified(51);unclassified(51);unclassified(51);unclassified(51);
Otu00316	639	Bacteria(100);"Proteobacteria"(100);Alphaproteobacteria(84);unclassified(84);unclassified(84);unclassified(84);
Otu00317	638	Bacteria(100);"Bacteroidetes"(100);Flavobacteria(100);"Flavobacteriales"(100);Flavobacteriaceae(100);Flavobacterium(100);
Otu00318	637	Bacteria(100);"Proteobacteria"(100);Betaproteobacteria(100);unclassified(100);unclassified(100);unclassified(100);
Otu00319	628	Bacteria(100);"Bacteroidetes"(100);Flavobacteria(100);"Flavobacteriales"(100);Flavobacteriaceae(100);Flavobacterium(100);
Otu00320	625	Bacteria(100);"Proteobacteria"(100);Deltaproteobacteria(99);unclassified(98);unclassified(98);unclassified(98);
Otu00321	625	Bacteria(100);unclassified(100);unclassified(100);unclassified(100);unclassified(100);unclassified(100);
Otu00322	624	Bacteria(100);"Proteobacteria"(100);Alphaproteobacteria(100);unclassified(100);unclassified(100);unclassified(100);
Otu00323	620	Bacteria(100);"Acidobacteria"(100);Acidobacteria_Gp17(100);Acidobacteria_Gp17_order_incertae_sedis(100);Acidobacteria_Gp17_family_incertae_sedis(100);Gp17(100);
Otu00324	620	Bacteria(100);"Proteobacteria"(100);Alphaproteobacteria(100);Rhizobiales(100);unclassified(99);unclassified(99);
Otu00325	619	Bacteria(100);unclassified(100);unclassified(100);unclassified(100);unclassified(100);unclassified(100);
Otu00326	618	Bacteria(100);"Planctomycetes"(100);"Planctomycetacia"(100);Planctomycetales(100);Planctomycetaceae(100);Zavarzinella(100);
Otu00327	616	Bacteria(100);"Proteobacteria"(100);Gammaproteobacteria(100);Xanthomonadales(70);Sinobacteraceae(70);Steroidobacter(70);
Otu00328	616	Bacteria(100);"Proteobacteria"(100);Gammaproteobacteria(100);unclassified(88);unclassified(88);unclassified(88);
Otu00329	613	Bacteria(100);"Verrucomicrobia"(100);unclassified(65);unclassified(65);unclassified(65);unclassified(65);
Otu00330	613	Bacteria(100);"Proteobacteria"(100);Betaproteobacteria(100);unclassified(100);unclassified(100);unclassified(100);
Otu00331	612	Bacteria(100);"Proteobacteria"(100);Alphaproteobacteria(100);Rhodospirillales(100);unclassified(100);unclassified(100);
Otu00332	607	Bacteria(100);unclassified(100);unclassified(100);unclassified(100);unclassified(100);unclassified(100);
Otu00333	606	Bacteria(100);"Proteobacteria"(100);Alphaproteobacteria(100);Rhizobiales(100);unclassified(100);unclassified(100);
Otu00334	606	Bacteria(100);"Chloroflexi"(100);unclassified(93);unclassified(93);unclassified(93);unclassified(93);
Otu00335	604	Bacteria(100);"Acidobacteria"(100);Acidobacteria_Gp16(100);Acidobacteria_Gp16_order_incertae_sedis(100);Acidobacteria_Gp16_family_incertae_sedis(100);Gp16(100);
Otu00336	604	Bacteria(100);"Proteobacteria"(100);Betaproteobacteria(100);unclassified(100);unclassified(100);unclassified(100);
Otu00337	601	Bacteria(100);"Proteobacteria"(100);Gammaproteobacteria(100);Pseudomonadales(100);Pseudomonadaceae(100);Cellvibrio(100);
Otu00338	601	Bacteria(100);"Proteobacteria"(100);Alphaproteobacteria(100);Rhizobiales(100);Hyphomicrobiaceae(100);Devosia(100);
Otu00339	599	Bacteria(100);"Bacteroidetes"(100);unclassified(88);unclassified(88);unclassified(88);unclassified(88);
Otu00340	598	Bacteria(100);"Bacteroidetes"(100);unclassified(100);unclassified(100);unclassified(100);unclassified(100);
Otu00341	596	Bacteria(100);"Actinobacteria"(100);Actinobacteria(100);Actinomycetales(100);Pseudonocardiaceae(100);Pseudonocardia(100);
Otu00342	594	Bacteria(100);"Bacteroidetes"(100);"Sphingobacteria"(100);"Sphingobacteriales"(100);Chitinophagaceae(100);unclassified(100);
Otu00343	592	Bacteria(100);unclassified(100);unclassified(100);unclassified(100);unclassified(100);unclassified(100);
Otu00344	588	Bacteria(100);"Gemmatimonadetes"(100);Gemmatimonadetes(100);Gemmatimonadales(100);Gemmatimonadaceae(100);Gemmatimonas(100);
Otu00345	587	Bacteria(100);"Proteobacteria"(100);Alphaproteobacteria(100);Rhizobiales(100);Hyphomicrobiaceae(100);Pedomicrobium(100);
Otu00346	586	Bacteria(100);"Planctomycetes"(100);"Planctomycetacia"(100);Planctomycetales(100);Planctomycetaceae(100);Singulisphaera(100);
Otu00347	586	Bacteria(100);"Acidobacteria"(100);Acidobacteria_Gp10(100);Acidobacteria_Gp10_order_incertae_sedis(100);Acidobacteria_Gp10_family_incertae_sedis(100);Gp10(100);
Otu00348	585	Bacteria(100);"Planctomycetes"(98);"Planctomycetacia"(98);Planctomycetales(98);Planctomycetaceae(98);unclassified(98);
Otu00349	582	Bacteria(100);Firmicutes(100);Bacilli(100);Bacillales(100);Pasteuriaceae(100);Pasteuria(100);
Otu00350	581	Bacteria(100);"Acidobacteria"(100);Acidobacteria_Gp3(100);Acidobacteria_Gp3_order_incertae_sedis(100);Acidobacteria_Gp3_family_incertae_sedis(100);Gp3(100);
Otu00351	581	Bacteria(100);"Bacteroidetes"(100);"Sphingobacteria"(69);"Sphingobacteriales"(69);unclassified(69);unclassified(69);
Otu00352	581	Bacteria(100);unclassified(100);unclassified(100);unclassified(100);unclassified(100);unclassified(100);
Otu00353	580	Bacteria(100);"Verrucomicrobia"(100);Subdivision3(100);Subdivision3_order_incertae_sedis(100);Subdivision3_family_incertae_sedis(100);3_genus_incertae_sedis(100);
Otu00354	580	Bacteria(100);unclassified(100);unclassified(100);unclassified(100);unclassified(100);unclassified(100);
Otu00355	579	Bacteria(100);"Bacteroidetes"(100);"Sphingobacteria"(100);"Sphingobacteriales"(100);Chitinophagaceae(100);Terrimonas(99);
Otu00356	576	Bacteria(100);unclassified(83);unclassified(83);unclassified(83);unclassified(83);unclassified(83);
Otu00357	576	Bacteria(100);unclassified(80);unclassified(80);unclassified(80);unclassified(80);unclassified(80);
Otu00358	575	Bacteria(100);"Proteobacteria"(100);Betaproteobacteria(100);Burkholderiales(52);unclassified(52);unclassified(52);
Otu00359	571	Bacteria(100);unclassified(100);unclassified(100);unclassified(100);unclassified(100);unclassified(100);
Otu00360	571	Bacteria(100);"Bacteroidetes"(100);unclassified(100);unclassified(100);unclassified(100);unclassified(100);
Otu00361	567	Bacteria(100);Firmicutes(100);Bacilli(100);Bacillales(100);Bacillaceae_1(100);Bacillus(73);
Otu00362	567	Bacteria(100);"Proteobacteria"(100);Gammaproteobacteria(100);Xanthomonadales(100);Xanthomonadaceae(100);unclassified(99);
Otu00363	566	Bacteria(100);"Proteobacteria"(100);Betaproteobacteria(100);unclassified(99);unclassified(99);unclassified(99);
Otu00364	561	Bacteria(100);unclassified(100);unclassified(100);unclassified(100);unclassified(100);unclassified(100);
Otu00365	560	Bacteria(100);"Planctomycetes"(100);"Planctomycetacia"(100);Planctomycetales(100);Planctomycetaceae(100);Planctomyces(100);
Otu00366	560	Bacteria(100);unclassified(100);unclassified(100);unclassified(100);unclassified(100);unclassified(100);
Otu00367	558	Bacteria(100);"Bacteroidetes"(100);unclassified(100);unclassified(100);unclassified(100);unclassified(100);
Otu00368	553	Bacteria(100);"Proteobacteria"(89);Deltaproteobacteria(61);unclassified(61);unclassified(61);unclassified(61);
Otu00369	553	Bacteria(100);unclassified(100);unclassified(100);unclassified(100);unclassified(100);unclassified(100);
Otu00370	551	Bacteria(100);"Actinobacteria"(100);Actinobacteria(100);Actinomycetales(100);Microbacteriaceae(100);Agromyces(100);
Otu00371	549	Bacteria(100);Firmicutes(100);Bacilli(100);Bacillales(100);Paenibacillaceae_2(100);Ammoniphilus(100);
Otu00372	549	Bacteria(100);"Acidobacteria"(100);Acidobacteria_Gp6(100);Acidobacteria_Gp6_order_incertae_sedis(100);Acidobacteria_Gp6_family_incertae_sedis(100);Gp6(100);
Otu00373	549	Bacteria(100);"Bacteroidetes"(100);"Sphingobacteria"(100);"Sphingobacteriales"(100);Chitinophagaceae(100);Ferruginibacter(85);
Otu00374	546	Bacteria(100);"Planctomycetes"(100);"Planctomycetacia"(100);Planctomycetales(100);Planctomycetaceae(100);Gemmata(100);
Otu00375	546	Bacteria(100);"Proteobacteria"(100);Betaproteobacteria(100);unclassified(100);unclassified(100);unclassified(100);
Otu00376	542	Bacteria(100);"Bacteroidetes"(100);"Sphingobacteria"(100);"Sphingobacteriales"(100);Chitinophagaceae(100);unclassified(100);
Otu00377	540	Bacteria(100);"Acidobacteria"(100);Acidobacteria_Gp15(100);Acidobacteria_Gp15_order_incertae_sedis(100);Acidobacteria_Gp15_family_incertae_sedis(100);Gp15(100);
Otu00378	539	Bacteria(100);unclassified(100);unclassified(100);unclassified(100);unclassified(100);unclassified(100);
Otu00379	538	Bacteria(100);"Actinobacteria"(100);Actinobacteria(100);unclassified(100);unclassified(100);unclassified(100);
Otu00380	537	Bacteria(100);"Bacteroidetes"(100);unclassified(100);unclassified(100);unclassified(100);unclassified(100);
Otu00381	537	Bacteria(100);"Verrucomicrobia"(100);Subdivision3(100);Subdivision3_order_incertae_sedis(100);Subdivision3_family_incertae_sedis(100);3_genus_incertae_sedis(100);
Otu00382	537	Bacteria(100);"Bacteroidetes"(100);"Sphingobacteria"(100);"Sphingobacteriales"(100);Chitinophagaceae(100);unclassified(100);
Otu00383	535	Bacteria(100);"Proteobacteria"(100);Alphaproteobacteria(100);Caulobacterales(100);Caulobacteraceae(100);Phenylobacterium(100);
Otu00384	535	Bacteria(100);"Acidobacteria"(100);Acidobacteria_Gp6(100);Acidobacteria_Gp6_order_incertae_sedis(100);Acidobacteria_Gp6_family_incertae_sedis(100);Gp6(100);
Otu00385	535	Bacteria(100);"Actinobacteria"(100);Actinobacteria(100);unclassified(92);unclassified(92);unclassified(92);
Otu00386	529	Bacteria(100);unclassified(100);unclassified(100);unclassified(100);unclassified(100);unclassified(100);
Otu00387	528	Bacteria(100);Firmicutes(100);Bacilli(100);Bacillales(100);unclassified(97);unclassified(97);
Otu00388	527	Bacteria(100);"Proteobacteria"(100);Alphaproteobacteria(100);unclassified(100);unclassified(100);unclassified(100);
Otu00389	525	Bacteria(100);"Acidobacteria"(88);Acidobacteria_Gp16(88);Acidobacteria_Gp16_order_incertae_sedis(88);Acidobacteria_Gp16_family_incertae_sedis(88);Gp16(88);
Otu00390	520	Bacteria(100);"Proteobacteria"(100);Deltaproteobacteria(100);unclassified(100);unclassified(100);unclassified(100);
Otu00391	520	Bacteria(100);unclassified(100);unclassified(100);unclassified(100);unclassified(100);unclassified(100);
Otu00392	518	Bacteria(100);"Proteobacteria"(100);Gammaproteobacteria(100);Xanthomonadales(100);Xanthomonadaceae(100);unclassified(100);
Otu00393	515	Bacteria(100);"Acidobacteria"(100);Acidobacteria_Gp11(100);Acidobacteria_Gp11_order_incertae_sedis(100);Acidobacteria_Gp11_family_incertae_sedis(100);Gp11(100);
Otu00394	510	Bacteria(100);"Proteobacteria"(100);Betaproteobacteria(100);unclassified(100);unclassified(100);unclassified(100);
Otu00395	509	Bacteria(100);"Proteobacteria"(100);Alphaproteobacteria(100);Rhizobiales(100);unclassified(100);unclassified(100);
Otu00396	509	Bacteria(100);"Proteobacteria"(100);Betaproteobacteria(100);Burkholderiales(80);unclassified(80);unclassified(80);
Otu00397	509	Bacteria(100);"Actinobacteria"(100);Actinobacteria(100);Solirubrobacterales(100);unclassified(100);unclassified(100);
Otu00398	508	Bacteria(100);"Proteobacteria"(100);Alphaproteobacteria(100);Sphingomonadales(100);Sphingomonadaceae(100);Sphingomonas(100);
Otu00399	503	Bacteria(100);"Proteobacteria"(100);Deltaproteobacteria(100);unclassified(100);unclassified(100);unclassified(100);
Otu00400	502	Bacteria(100);"Acidobacteria"(100);Acidobacteria_Gp3(100);Acidobacteria_Gp3_order_incertae_sedis(100);Acidobacteria_Gp3_family_incertae_sedis(100);Gp3(100);
Otu00401	501	Bacteria(100);"Bacteroidetes"(100);"Sphingobacteria"(100);"Sphingobacteriales"(100);Chitinophagaceae(100);Ferruginibacter(66);
Otu00402	499	Bacteria(100);unclassified(100);unclassified(100);unclassified(100);unclassified(100);unclassified(100);
Otu00403	499	Bacteria(100);"Planctomycetes"(100);"Planctomycetacia"(100);Planctomycetales(100);Planctomycetaceae(100);Planctomyces(100);
Otu00404	497	Bacteria(100);"Proteobacteria"(100);Alphaproteobacteria(100);Rhizobiales(100);unclassified(99);unclassified(99);
Otu00405	492	Bacteria(100);"Proteobacteria"(100);Betaproteobacteria(100);unclassified(100);unclassified(100);unclassified(100);
Otu00406	490	Bacteria(100);"Verrucomicrobia"(100);Verrucomicrobiae(77);Verrucomicrobiales(77);Verrucomicrobiaceae(77);unclassified(77);
Otu00407	488	Bacteria(100);"Proteobacteria"(100);Betaproteobacteria(100);unclassified(100);unclassified(100);unclassified(100);
Otu00408	487	Bacteria(100);"Actinobacteria"(100);Actinobacteria(100);Solirubrobacterales(89);unclassified(89);unclassified(89);
Otu00409	486	Bacteria(100);unclassified(100);unclassified(100);unclassified(100);unclassified(100);unclassified(100);
Otu00410	486	Bacteria(100);"Actinobacteria"(100);Actinobacteria(100);Acidimicrobiales(100);unclassified(100);unclassified(100);
Otu00411	486	Bacteria(100);"Chloroflexi"(51);unclassified(100);unclassified(100);unclassified(100);unclassified(100);
Otu00412	485	Bacteria(100);Firmicutes(100);Bacilli(100);Bacillales(100);Pasteuriaceae(100);Pasteuria(100);
Otu00413	482	Bacteria(100);"Acidobacteria"(100);Acidobacteria_Gp3(100);Acidobacteria_Gp3_order_incertae_sedis(100);Acidobacteria_Gp3_family_incertae_sedis(100);Gp3(100);
Otu00414	482	Bacteria(100);"Proteobacteria"(100);Betaproteobacteria(100);unclassified(100);unclassified(100);unclassified(100);
Otu00415	481	Bacteria(100);"Proteobacteria"(100);Gammaproteobacteria(100);unclassified(99);unclassified(99);unclassified(99);
Otu00416	481	Bacteria(100);"Acidobacteria"(100);Acidobacteria_Gp6(100);Acidobacteria_Gp6_order_incertae_sedis(100);Acidobacteria_Gp6_family_incertae_sedis(100);Gp6(100);
Otu00417	481	Bacteria(100);"Proteobacteria"(100);Gammaproteobacteria(100);Xanthomonadales(100);Xanthomonadaceae(100);Dokdonella(100);
Otu00418	481	Bacteria(100);"Actinobacteria"(100);Actinobacteria(100);Actinomycetales(100);Nocardioidaceae(100);Aeromicrobium(100);
Otu00419	480	Bacteria(100);"Proteobacteria"(100);Alphaproteobacteria(100);unclassified(100);unclassified(100);unclassified(100);
Otu00420	478	Bacteria(100);"Bacteroidetes"(100);unclassified(100);unclassified(100);unclassified(100);unclassified(100);
Otu00421	477	Bacteria(100);"Bacteroidetes"(100);"Sphingobacteria"(100);"Sphingobacteriales"(100);Chitinophagaceae(100);unclassified(86);
Otu00422	477	Bacteria(100);unclassified(99);unclassified(99);unclassified(99);unclassified(99);unclassified(99);
Otu00423	477	Bacteria(100);"Proteobacteria"(100);Gammaproteobacteria(98);unclassified(98);unclassified(98);unclassified(98);
Otu00424	474	Bacteria(100);"Proteobacteria"(100);Betaproteobacteria(100);unclassified(100);unclassified(100);unclassified(100);
Otu00425	474	Bacteria(100);unclassified(100);unclassified(100);unclassified(100);unclassified(100);unclassified(100);
Otu00426	474	Bacteria(100);"Planctomycetes"(100);"Planctomycetacia"(100);Planctomycetales(100);Planctomycetaceae(100);Planctomyces(100);
Otu00427	472	Bacteria(100);"Acidobacteria"(100);Acidobacteria_Gp3(100);Acidobacteria_Gp3_order_incertae_sedis(100);Acidobacteria_Gp3_family_incertae_sedis(100);Gp3(100);
Otu00428	470	Bacteria(100);"Acidobacteria"(100);Acidobacteria_Gp2(100);Acidobacteria_Gp2_order_incertae_sedis(100);Acidobacteria_Gp2_family_incertae_sedis(100);Gp2(100);
Otu00429	470	Bacteria(100);WS3(100);WS3_class_incertae_sedis(100);WS3_order_incertae_sedis(100);WS3_family_incertae_sedis(100);WS3_genus_incertae_sedis(100);
Otu00430	469	Bacteria(100);"Actinobacteria"(100);Actinobacteria(100);Actinomycetales(100);Micromonosporaceae(100);unclassified(100);
Otu00431	468	Bacteria(100);"Proteobacteria"(100);Alphaproteobacteria(100);Rhodospirillales(100);Acetobacteraceae(100);Acidisoma(88);
Otu00432	468	Bacteria(100);"Bacteroidetes"(100);Flavobacteria(100);"Flavobacteriales"(100);Cryomorphaceae(100);unclassified(62);
Otu00433	468	Bacteria(100);unclassified(100);unclassified(100);unclassified(100);unclassified(100);unclassified(100);
Otu00434	467	Bacteria(100);"Proteobacteria"(100);Deltaproteobacteria(100);Myxococcales(100);unclassified(100);unclassified(100);
Otu00435	467	Bacteria(100);"Proteobacteria"(100);Deltaproteobacteria(100);Myxococcales(100);Nannocystaceae(100);unclassified(100);
Otu00436	466	Bacteria(100);"Proteobacteria"(100);unclassified(100);unclassified(100);unclassified(100);unclassified(100);
Otu00437	463	Bacteria(100);unclassified(100);unclassified(100);unclassified(100);unclassified(100);unclassified(100);
Otu00438	463	Bacteria(100);"Proteobacteria"(100);Betaproteobacteria(100);unclassified(100);unclassified(100);unclassified(100);
Otu00439	463	Bacteria(100);"Proteobacteria"(100);Alphaproteobacteria(100);unclassified(100);unclassified(100);unclassified(100);
Otu00440	457	Bacteria(100);"Bacteroidetes"(100);Flavobacteria(100);"Flavobacteriales"(100);Flavobacteriaceae(100);unclassified(95);
Otu00441	457	Bacteria(100);unclassified(100);unclassified(100);unclassified(100);unclassified(100);unclassified(100);
Otu00442	455	Bacteria(100);"Gemmatimonadetes"(94);Gemmatimonadetes(94);Gemmatimonadales(94);Gemmatimonadaceae(94);Gemmatimonas(94);
Otu00443	455	Bacteria(100);"Chloroflexi"(100);Thermomicrobia(100);unclassified(100);unclassified(100);unclassified(100);
Otu00444	454	Bacteria(100);"Proteobacteria"(100);Deltaproteobacteria(100);Myxococcales(100);Cystobacteraceae(63);Cystobacter(58);
Otu00445	453	Bacteria(100);unclassified(100);unclassified(100);unclassified(100);unclassified(100);unclassified(100);
Otu00446	451	Bacteria(100);"Proteobacteria"(100);Alphaproteobacteria(100);Rhizobiales(100);Bradyrhizobiaceae(100);Bosea(100);
Otu00447	450	Bacteria(100);"Bacteroidetes"(100);Flavobacteria(100);"Flavobacteriales"(100);Flavobacteriaceae(100);Flavobacterium(100);
Otu00448	450	Bacteria(100);unclassified(58);unclassified(58);unclassified(58);unclassified(58);unclassified(58);
Otu00449	449	Bacteria(100);"Proteobacteria"(100);Gammaproteobacteria(100);Chromatiales(100);Chromatiaceae(100);Rheinheimera(100);
Otu00450	447	Bacteria(100);"Verrucomicrobia"(100);Spartobacteria(100);Spartobacteria_order_incertae_sedis(100);Spartobacteria_family_incertae_sedis(100);Spartobacteria_genera_incertae_sedis(100);
Otu00451	445	Bacteria(100);"Proteobacteria"(100);Deltaproteobacteria(100);Myxococcales(100);Polyangiaceae(100);unclassified(73);
Otu00452	444	Bacteria(100);"Planctomycetes"(100);"Planctomycetacia"(100);Planctomycetales(100);Planctomycetaceae(100);unclassified(100);
Otu00454	442	Bacteria(100);"Acidobacteria"(100);Acidobacteria_Gp6(100);Acidobacteria_Gp6_order_incertae_sedis(100);Acidobacteria_Gp6_family_incertae_sedis(100);Gp6(100);
Otu00455	442	Bacteria(100);"Verrucomicrobia"(100);Spartobacteria(96);Spartobacteria_order_incertae_sedis(96);Spartobacteria_family_incertae_sedis(96);Spartobacteria_genera_incertae_sedis(96);
Otu00456	441	Bacteria(100);unclassified(100);unclassified(100);unclassified(100);unclassified(100);unclassified(100);
Otu00457	441	Bacteria(100);"Planctomycetes"(100);"Planctomycetacia"(100);Planctomycetales(100);Planctomycetaceae(100);unclassified(100);
Otu00458	440	Bacteria(100);"Proteobacteria"(100);Deltaproteobacteria(100);Myxococcales(100);Nannocystaceae(100);Enhygromyxa(100);
Otu00459	439	Bacteria(100);unclassified(100);unclassified(100);unclassified(100);unclassified(100);unclassified(100);
Otu00460	438	Bacteria(100);"Bacteroidetes"(100);unclassified(100);unclassified(100);unclassified(100);unclassified(100);
Otu00461	438	Bacteria(100);"Proteobacteria"(100);unclassified(100);unclassified(100);unclassified(100);unclassified(100);
Otu00462	438	Bacteria(100);"Acidobacteria"(100);Acidobacteria_Gp16(100);Acidobacteria_Gp16_order_incertae_sedis(100);Acidobacteria_Gp16_family_incertae_sedis(100);Gp16(100);
Otu00463	438	Bacteria(100);"Planctomycetes"(100);"Planctomycetacia"(100);Planctomycetales(100);Planctomycetaceae(100);unclassified(74);
Otu00464	437	Bacteria(100);unclassified(100);unclassified(100);unclassified(100);unclassified(100);unclassified(100);
Otu00465	436	Bacteria(100);unclassified(100);unclassified(100);unclassified(100);unclassified(100);unclassified(100);
Otu00466	436	Bacteria(100);"Proteobacteria"(100);Epsilonproteobacteria(100);Campylobacterales(100);Campylobacteraceae(100);Arcobacter(100);
Otu00467	436	Bacteria(100);"Planctomycetes"(100);"Planctomycetacia"(100);Planctomycetales(100);Planctomycetaceae(100);unclassified(100);
Otu00468	435	Bacteria(100);"Proteobacteria"(100);Alphaproteobacteria(100);Alphaproteobacteria_order_incertae_sedis(100);Alphaproteobacteria_family_incertae_sedis(100);Rhizomicrobium(100);
Otu00469	432	Bacteria(100);unclassified(100);unclassified(100);unclassified(100);unclassified(100);unclassified(100);
Otu00470	431	Bacteria(100);"Verrucomicrobia"(100);Spartobacteria(100);Spartobacteria_order_incertae_sedis(100);Spartobacteria_family_incertae_sedis(100);Spartobacteria_genera_incertae_sedis(53);
Otu00471	431	Bacteria(100);"Verrucomicrobia"(100);Subdivision3(100);Subdivision3_order_incertae_sedis(100);Subdivision3_family_incertae_sedis(100);3_genus_incertae_sedis(100);
Otu00472	429	Bacteria(100);"Acidobacteria"(100);Acidobacteria_Gp6(100);Acidobacteria_Gp6_order_incertae_sedis(100);Acidobacteria_Gp6_family_incertae_sedis(100);Gp6(100);
Otu00473	429	Bacteria(100);"Bacteroidetes"(100);"Sphingobacteria"(100);"Sphingobacteriales"(100);Chitinophagaceae(100);unclassified(100);
Otu00474	429	Bacteria(100);"Actinobacteria"(100);Actinobacteria(100);unclassified(93);unclassified(93);unclassified(93);
Otu00475	428	Bacteria(100);"Proteobacteria"(100);Alphaproteobacteria(100);Caulobacterales(100);Caulobacteraceae(100);Brevundimonas(100);
Otu00476	427	Bacteria(100);"Proteobacteria"(100);Betaproteobacteria(100);unclassified(70);unclassified(70);unclassified(70);
Otu00477	427	Bacteria(100);unclassified(100);unclassified(100);unclassified(100);unclassified(100);unclassified(100);
Otu00478	425	Bacteria(100);"Proteobacteria"(100);Gammaproteobacteria(100);Xanthomonadales(59);Sinobacteraceae(59);Steroidobacter(59);
Otu00479	423	Bacteria(100);"Proteobacteria"(100);Betaproteobacteria(100);unclassified(100);unclassified(100);unclassified(100);
Otu00480	423	Bacteria(100);unclassified(100);unclassified(100);unclassified(100);unclassified(100);unclassified(100);
Otu00481	419	Bacteria(100);"Chloroflexi"(100);Anaerolineae(100);Anaerolineales(100);Anaerolineaceae(100);unclassified(100);
Otu00482	418	Bacteria(100);"Verrucomicrobia"(100);Subdivision3(100);Subdivision3_order_incertae_sedis(100);Subdivision3_family_incertae_sedis(100);3_genus_incertae_sedis(100);
Otu00483	417	Bacteria(100);"Proteobacteria"(100);Betaproteobacteria(100);unclassified(52);unclassified(52);unclassified(52);
Otu00484	416	Bacteria(100);"Planctomycetes"(100);"Planctomycetacia"(100);Planctomycetales(100);Planctomycetaceae(100);Singulisphaera(100);
Otu00485	414	Bacteria(100);unclassified(100);unclassified(100);unclassified(100);unclassified(100);unclassified(100);
Otu00486	414	Bacteria(100);"Acidobacteria"(100);Acidobacteria_Gp4(100);Acidobacteria_Gp4_order_incertae_sedis(100);Acidobacteria_Gp4_family_incertae_sedis(100);Gp4(100);
Otu00487	414	Bacteria(100);"Acidobacteria"(100);Acidobacteria_Gp17(100);Acidobacteria_Gp17_order_incertae_sedis(100);Acidobacteria_Gp17_family_incertae_sedis(100);Gp17(100);
Otu00488	412	Bacteria(100);"Acidobacteria"(100);Acidobacteria_Gp25(100);Acidobacteria_Gp25_order_incertae_sedis(100);Acidobacteria_Gp25_family_incertae_sedis(100);Gp25(100);
Otu00489	409	Bacteria(100);unclassified(99);unclassified(99);unclassified(99);unclassified(99);unclassified(99);
Otu00490	409	Bacteria(100);unclassified(98);unclassified(98);unclassified(98);unclassified(98);unclassified(98);
Otu00491	408	Bacteria(100);"Actinobacteria"(100);Actinobacteria(100);Solirubrobacterales(100);unclassified(94);unclassified(94);
Otu00492	407	Bacteria(100);"Bacteroidetes"(100);unclassified(87);unclassified(87);unclassified(87);unclassified(87);
Otu00493	407	Bacteria(100);unclassified(100);unclassified(100);unclassified(100);unclassified(100);unclassified(100);
Otu00494	406	Bacteria(100);unclassified(100);unclassified(100);unclassified(100);unclassified(100);unclassified(100);
Otu00495	406	Bacteria(100);"Chloroflexi"(84);unclassified(84);unclassified(84);unclassified(84);unclassified(84);
Otu00496	405	Bacteria(100);unclassified(100);unclassified(100);unclassified(100);unclassified(100);unclassified(100);
Otu00497	403	Bacteria(100);"Acidobacteria"(100);Acidobacteria_Gp6(100);Acidobacteria_Gp6_order_incertae_sedis(100);Acidobacteria_Gp6_family_incertae_sedis(100);Gp6(100);
Otu00498	402	Bacteria(100);unclassified(100);unclassified(100);unclassified(100);unclassified(100);unclassified(100);
Otu00499	402	Bacteria(100);"Actinobacteria"(100);Actinobacteria(100);Solirubrobacterales(100);unclassified(96);unclassified(96);
Otu00500	401	Bacteria(100);"Proteobacteria"(100);Alphaproteobacteria(100);Sphingomonadales(100);Sphingomonadaceae(100);Sphingomonas(100);
Otu00501	400	Bacteria(100);"Acidobacteria"(100);Acidobacteria_Gp6(100);Acidobacteria_Gp6_order_incertae_sedis(100);Acidobacteria_Gp6_family_incertae_sedis(100);Gp6(100);
Otu00502	399	Bacteria(100);"Actinobacteria"(100);Actinobacteria(100);Actinomycetales(100);Nocardioidaceae(100);Nocardioides(100);
Otu00503	394	Bacteria(100);unclassified(100);unclassified(100);unclassified(100);unclassified(100);unclassified(100);
Otu00504	394	Bacteria(100);"Acidobacteria"(100);Acidobacteria_Gp22(100);Acidobacteria_Gp22_order_incertae_sedis(100);Acidobacteria_Gp22_family_incertae_sedis(100);Gp22(100);
Otu00505	393	Bacteria(100);"Proteobacteria"(100);Alphaproteobacteria(100);Rhodospirillales(100);Rhodospirillaceae(100);Dongia(100);
Otu00506	393	Bacteria(100);"Proteobacteria"(100);Betaproteobacteria(100);Methylophilales(100);Methylophilaceae(100);Methylophilus(100);
Otu00507	393	Bacteria(100);unclassified(100);unclassified(100);unclassified(100);unclassified(100);unclassified(100);
Otu00508	392	Bacteria(100);"Actinobacteria"(100);Actinobacteria(100);unclassified(100);unclassified(100);unclassified(100);
Otu00509	391	Bacteria(100);"Acidobacteria"(100);Acidobacteria_Gp6(100);Acidobacteria_Gp6_order_incertae_sedis(100);Acidobacteria_Gp6_family_incertae_sedis(100);Gp6(100);
Otu00510	391	Bacteria(100);unclassified(100);unclassified(100);unclassified(100);unclassified(100);unclassified(100);
Otu00511	389	Bacteria(100);"Acidobacteria"(100);Acidobacteria_Gp5(100);Acidobacteria_Gp5_order_incertae_sedis(100);Acidobacteria_Gp5_family_incertae_sedis(100);Gp5(100);
Otu00512	388	Bacteria(100);"Bacteroidetes"(100);"Sphingobacteria"(100);"Sphingobacteriales"(100);Chitinophagaceae(100);unclassified(100);
Otu00513	388	Bacteria(100);"Verrucomicrobia"(100);Subdivision3(100);Subdivision3_order_incertae_sedis(100);Subdivision3_family_incertae_sedis(100);3_genus_incertae_sedis(100);
Otu00514	385	Bacteria(100);"Actinobacteria"(100);Actinobacteria(100);Actinomycetales(100);Thermomonosporaceae(92);Actinoallomurus(92);
Otu00515	385	Bacteria(100);"Verrucomicrobia"(100);Subdivision3(100);Subdivision3_order_incertae_sedis(100);Subdivision3_family_incertae_sedis(100);3_genus_incertae_sedis(100);
Otu00516	385	Bacteria(100);"Bacteroidetes"(100);unclassified(100);unclassified(100);unclassified(100);unclassified(100);
Otu00517	385	Bacteria(100);"Bacteroidetes"(100);"Bacteroidetes"_incertae_sedis_class_incertae_sedis(100);"Bacteroidetes"_incertae_sedis_order_incertae_sedis(100);"Bacteroidetes"_incertae_sedis_family_incertae_sedis(100);Ohtaekwangia(100);
Otu00518	384	Bacteria(100);"Bacteroidetes"(100);"Sphingobacteria"(100);"Sphingobacteriales"(100);Chitinophagaceae(100);unclassified(100);
Otu00519	382	Bacteria(100);"Bacteroidetes"(100);"Sphingobacteria"(100);"Sphingobacteriales"(100);"Cyclobacteriaceae"(100);Algoriphagus(100);
Otu00520	381	Bacteria(100);"Acidobacteria"(100);Acidobacteria_Gp3(100);Acidobacteria_Gp3_order_incertae_sedis(100);Acidobacteria_Gp3_family_incertae_sedis(100);Gp3(100);
Otu00521	381	Bacteria(100);"Proteobacteria"(100);Alphaproteobacteria(100);Rhizobiales(100);Phyllobacteriaceae(100);Aminobacter(66);
Otu00522	380	Bacteria(100);"Planctomycetes"(100);"Planctomycetacia"(100);Planctomycetales(100);Planctomycetaceae(100);Singulisphaera(100);
Otu00523	379	Bacteria(100);"Bacteroidetes"(100);Flavobacteria(100);"Flavobacteriales"(100);Flavobacteriaceae(100);Flavobacterium(100);
Otu00524	378	Bacteria(100);"Bacteroidetes"(100);Flavobacteria(100);"Flavobacteriales"(100);Flavobacteriaceae(100);Aequorivita(100);
Otu00525	377	Bacteria(100);unclassified(60);unclassified(60);unclassified(60);unclassified(60);unclassified(60);
Otu00526	377	Bacteria(100);"Acidobacteria"(100);Acidobacteria_Gp4(100);Acidobacteria_Gp4_order_incertae_sedis(100);Acidobacteria_Gp4_family_incertae_sedis(100);Gp4(100);
Otu00527	376	Bacteria(100);"Proteobacteria"(100);Alphaproteobacteria(61);unclassified(60);unclassified(60);unclassified(60);
Otu00528	376	Bacteria(100);unclassified(100);unclassified(100);unclassified(100);unclassified(100);unclassified(100);
Otu00529	376	Bacteria(100);"Bacteroidetes"(100);"Sphingobacteria"(100);"Sphingobacteriales"(100);Chitinophagaceae(100);unclassified(100);
Otu00530	376	Bacteria(100);"Proteobacteria"(100);Alphaproteobacteria(100);Rhodospirillales(100);unclassified(100);unclassified(100);
Otu00531	375	Bacteria(100);"Chloroflexi"(99);unclassified(99);unclassified(99);unclassified(99);unclassified(99);
Otu00532	375	Bacteria(100);"Planctomycetes"(100);"Planctomycetacia"(100);Planctomycetales(100);Planctomycetaceae(100);Planctomyces(100);
Otu00533	373	Bacteria(100);"Proteobacteria"(100);Deltaproteobacteria(100);Myxococcales(100);unclassified(100);unclassified(100);
Otu00534	372	Bacteria(100);unclassified(99);unclassified(99);unclassified(99);unclassified(99);unclassified(99);
Otu00535	372	Bacteria(100);unclassified(100);unclassified(100);unclassified(100);unclassified(100);unclassified(100);
Otu00536	371	Bacteria(100);"Proteobacteria"(100);Alphaproteobacteria(100);Rhodospirillales(100);Acetobacteraceae(64);unclassified(64);
Otu00537	369	Bacteria(100);"Bacteroidetes"(100);unclassified(74);unclassified(74);unclassified(74);unclassified(74);
Otu00538	367	Bacteria(100);"Actinobacteria"(100);Actinobacteria(100);Actinomycetales(100);Nocardiaceae(100);Rhodococcus(100);
Otu00539	367	Bacteria(100);"Bacteroidetes"(100);unclassified(100);unclassified(100);unclassified(100);unclassified(100);
Otu00540	366	Bacteria(100);"Actinobacteria"(100);Actinobacteria(100);Acidimicrobiales(100);unclassified(100);unclassified(100);
Otu00541	366	Bacteria(100);"Bacteroidetes"(100);"Sphingobacteria"(100);"Sphingobacteriales"(100);Chitinophagaceae(100);Flavitalea(100);
Otu00542	366	Bacteria(100);"Bacteroidetes"(100);"Sphingobacteria"(100);"Sphingobacteriales"(100);Chitinophagaceae(97);unclassified(97);
Otu00543	365	Bacteria(100);"Verrucomicrobia"(100);Spartobacteria(100);Spartobacteria_order_incertae_sedis(100);Spartobacteria_family_incertae_sedis(100);Spartobacteria_genera_incertae_sedis(100);
Otu00544	365	Bacteria(100);"Planctomycetes"(100);"Planctomycetacia"(100);Planctomycetales(100);Planctomycetaceae(100);unclassified(100);
Otu00545	365	Bacteria(100);"Proteobacteria"(100);Gammaproteobacteria(67);unclassified(67);unclassified(67);unclassified(67);
Otu00546	365	Bacteria(100);"Bacteroidetes"(100);unclassified(100);unclassified(100);unclassified(100);unclassified(100);
Otu00547	363	Bacteria(100);unclassified(61);unclassified(61);unclassified(61);unclassified(61);unclassified(61);
Otu00548	363	Bacteria(100);"Planctomycetes"(100);"Planctomycetacia"(100);Planctomycetales(100);Planctomycetaceae(100);Zavarzinella(100);
Otu00549	362	Bacteria(100);"Acidobacteria"(100);Acidobacteria_Gp25(100);Acidobacteria_Gp25_order_incertae_sedis(100);Acidobacteria_Gp25_family_incertae_sedis(100);Gp25(100);
Otu00550	362	Bacteria(100);"Acidobacteria"(100);Acidobacteria_Gp18(100);Acidobacteria_Gp18_order_incertae_sedis(100);Acidobacteria_Gp18_family_incertae_sedis(100);Gp18(100);
Otu00551	361	Bacteria(100);"Planctomycetes"(100);"Planctomycetacia"(100);Planctomycetales(100);Planctomycetaceae(100);Gemmata(100);
Otu00552	360	Bacteria(100);unclassified(100);unclassified(100);unclassified(100);unclassified(100);unclassified(100);
Otu00553	359	Bacteria(100);"Planctomycetes"(100);"Planctomycetacia"(100);Planctomycetales(100);Planctomycetaceae(100);Planctomyces(100);
Otu00554	359	Bacteria(100);"Bacteroidetes"(100);Flavobacteria(100);"Flavobacteriales"(100);Flavobacteriaceae(100);Bizionia(100);
Otu00555	356	Bacteria(100);"Acidobacteria"(100);Acidobacteria_Gp6(100);Acidobacteria_Gp6_order_incertae_sedis(100);Acidobacteria_Gp6_family_incertae_sedis(100);Gp6(100);
Otu00556	356	Bacteria(100);unclassified(100);unclassified(100);unclassified(100);unclassified(100);unclassified(100);
Otu00557	355	Bacteria(100);"Proteobacteria"(100);Alphaproteobacteria(100);Rhizobiales(100);unclassified(92);unclassified(92);
Otu00558	355	Bacteria(100);"Planctomycetes"(100);"Planctomycetacia"(100);Planctomycetales(100);Planctomycetaceae(100);Planctomyces(100);
Otu00559	355	Bacteria(100);"Acidobacteria"(100);Acidobacteria_Gp6(100);Acidobacteria_Gp6_order_incertae_sedis(100);Acidobacteria_Gp6_family_incertae_sedis(100);Gp6(100);
Otu00560	353	Bacteria(100);"Proteobacteria"(100);Alphaproteobacteria(100);unclassified(85);unclassified(85);unclassified(85);
Otu00561	353	Bacteria(100);"Proteobacteria"(100);Gammaproteobacteria(100);unclassified(100);unclassified(100);unclassified(100);
Otu00562	353	Bacteria(100);"Acidobacteria"(100);Acidobacteria_Gp5(100);Acidobacteria_Gp5_order_incertae_sedis(100);Acidobacteria_Gp5_family_incertae_sedis(100);Gp5(100);
Otu00563	352	Bacteria(100);"Planctomycetes"(100);"Planctomycetacia"(100);Planctomycetales(100);Planctomycetaceae(100);unclassified(100);
Otu00564	352	Bacteria(100);"Bacteroidetes"(100);"Sphingobacteria"(100);"Sphingobacteriales"(100);unclassified(100);unclassified(100);
Otu00565	352	Bacteria(100);Firmicutes(100);Bacilli(100);Bacillales(100);Pasteuriaceae(100);Pasteuria(100);
Otu00566	351	Bacteria(100);"Proteobacteria"(100);Alphaproteobacteria(100);Rhodobacterales(100);Rhodobacteraceae(100);Amaricoccus(99);
Otu00567	350	Bacteria(100);"Proteobacteria"(100);Alphaproteobacteria(100);unclassified(100);unclassified(100);unclassified(100);
Otu00568	350	Bacteria(100);"Acidobacteria"(100);Acidobacteria_Gp2(100);Acidobacteria_Gp2_order_incertae_sedis(100);Acidobacteria_Gp2_family_incertae_sedis(100);Gp2(100);
Otu00569	349	Bacteria(100);"Bacteroidetes"(100);"Bacteroidia"(100);"Bacteroidales"(100);"Porphyromonadaceae"(92);unclassified(92);
Otu00570	349	Bacteria(100);unclassified(100);unclassified(100);unclassified(100);unclassified(100);unclassified(100);
Otu00571	347	Bacteria(100);"Bacteroidetes"(100);"Bacteroidia"(100);"Bacteroidales"(100);"Porphyromonadaceae"(100);Petrimonas(100);
Otu00572	346	Bacteria(100);"Verrucomicrobia"(100);Subdivision3(100);Subdivision3_order_incertae_sedis(100);Subdivision3_family_incertae_sedis(100);3_genus_incertae_sedis(100);
Otu00573	346	Bacteria(100);"Planctomycetes"(100);"Planctomycetacia"(100);Planctomycetales(100);Planctomycetaceae(100);Singulisphaera(100);
Otu00574	345	Bacteria(100);"Proteobacteria"(100);Gammaproteobacteria(100);Xanthomonadales(100);Xanthomonadaceae(100);Thermomonas(100);
Otu00575	345	Bacteria(100);"Planctomycetes"(100);"Planctomycetacia"(100);Planctomycetales(100);Planctomycetaceae(100);unclassified(100);
Otu00576	344	Bacteria(100);unclassified(100);unclassified(100);unclassified(100);unclassified(100);unclassified(100);
Otu00577	343	Bacteria(100);unclassified(100);unclassified(100);unclassified(100);unclassified(100);unclassified(100);
Otu00578	341	Bacteria(100);"Bacteroidetes"(100);unclassified(100);unclassified(100);unclassified(100);unclassified(100);
Otu00579	340	Bacteria(100);"Verrucomicrobia"(100);Subdivision3(100);Subdivision3_order_incertae_sedis(100);Subdivision3_family_incertae_sedis(100);3_genus_incertae_sedis(100);
Otu00580	340	Bacteria(100);"Gemmatimonadetes"(100);Gemmatimonadetes(100);Gemmatimonadales(100);Gemmatimonadaceae(100);Gemmatimonas(100);
Otu00581	340	Bacteria(100);unclassified(100);unclassified(100);unclassified(100);unclassified(100);unclassified(100);
Otu00582	339	Bacteria(100);unclassified(100);unclassified(100);unclassified(100);unclassified(100);unclassified(100);
Otu00583	339	Bacteria(100);unclassified(100);unclassified(100);unclassified(100);unclassified(100);unclassified(100);
Otu00584	338	Bacteria(100);unclassified(100);unclassified(100);unclassified(100);unclassified(100);unclassified(100);
Otu00585	338	Bacteria(100);"Acidobacteria"(100);Acidobacteria_Gp3(100);Acidobacteria_Gp3_order_incertae_sedis(100);Acidobacteria_Gp3_family_incertae_sedis(100);Gp3(100);
Otu00586	337	Bacteria(100);"Acidobacteria"(100);Acidobacteria_Gp6(100);Acidobacteria_Gp6_order_incertae_sedis(100);Acidobacteria_Gp6_family_incertae_sedis(100);Gp6(100);
Otu00587	335	Bacteria(100);"Planctomycetes"(100);"Planctomycetacia"(100);Planctomycetales(100);Planctomycetaceae(100);Zavarzinella(100);
Otu00588	335	Bacteria(100);"Proteobacteria"(100);Alphaproteobacteria(100);Rhodospirillales(100);Rhodospirillaceae(100);Skermanella(100);
Otu00589	333	Bacteria(100);"Verrucomicrobia"(100);Subdivision3(53);Subdivision3_order_incertae_sedis(53);Subdivision3_family_incertae_sedis(53);3_genus_incertae_sedis(53);
Otu00590	333	Bacteria(100);"Planctomycetes"(100);"Planctomycetacia"(100);Planctomycetales(100);Planctomycetaceae(100);unclassified(100);
Otu00591	332	Bacteria(100);"Proteobacteria"(100);Deltaproteobacteria(100);Myxococcales(100);Polyangiaceae(100);unclassified(82);
Otu00592	331	Bacteria(100);unclassified(58);unclassified(58);unclassified(58);unclassified(58);unclassified(58);
Otu00593	331	Bacteria(100);unclassified(100);unclassified(100);unclassified(100);unclassified(100);unclassified(100);
Otu00594	331	Bacteria(100);"Bacteroidetes"(100);"Bacteroidia"(100);"Bacteroidales"(100);unclassified(100);unclassified(100);
Otu00595	330	Bacteria(100);unclassified(100);unclassified(100);unclassified(100);unclassified(100);unclassified(100);
Otu00596	329	Bacteria(100);"Acidobacteria"(100);Acidobacteria_Gp6(100);Acidobacteria_Gp6_order_incertae_sedis(100);Acidobacteria_Gp6_family_incertae_sedis(100);Gp6(100);
Otu00597	328	Bacteria(100);Firmicutes(100);Clostridia(100);Clostridiales(100);Clostridiaceae_1(100);Clostridium_sensu_stricto(100);
Otu00598	327	Bacteria(100);"Proteobacteria"(100);Betaproteobacteria(100);Burkholderiales(100);Comamonadaceae(100);Hydrogenophaga(95);
Otu00599	327	Bacteria(100);Firmicutes(93);Bacilli(93);Bacillales(93);Pasteuriaceae(93);Pasteuria(93);
Otu00600	326	Bacteria(100);"Acidobacteria"(100);Acidobacteria_Gp16(100);Acidobacteria_Gp16_order_incertae_sedis(100);Acidobacteria_Gp16_family_incertae_sedis(100);Gp16(100);
Otu00601	326	Bacteria(100);"Actinobacteria"(100);Actinobacteria(100);unclassified(100);unclassified(100);unclassified(100);
Otu00602	325	Bacteria(100);"Proteobacteria"(100);Alphaproteobacteria(100);Rhizobiales(100);Rhizobiaceae(100);Rhizobium(100);
Otu00603	325	Bacteria(100);unclassified(100);unclassified(100);unclassified(100);unclassified(100);unclassified(100);
Otu00604	323	Bacteria(100);unclassified(100);unclassified(100);unclassified(100);unclassified(100);unclassified(100);
Otu00605	323	Bacteria(100);"Planctomycetes"(100);"Planctomycetacia"(100);Planctomycetales(100);Planctomycetaceae(100);Blastopirellula(100);
Otu00606	323	Bacteria(100);unclassified(100);unclassified(100);unclassified(100);unclassified(100);unclassified(100);
Otu00607	322	Bacteria(100);"Proteobacteria"(100);Deltaproteobacteria(100);unclassified(100);unclassified(100);unclassified(100);
Otu00608	322	Bacteria(100);unclassified(99);unclassified(99);unclassified(99);unclassified(99);unclassified(99);
Otu00609	322	Bacteria(100);"Planctomycetes"(100);"Planctomycetacia"(100);Planctomycetales(100);Planctomycetaceae(100);Gemmata(83);
Otu00610	322	Bacteria(100);"Actinobacteria"(100);Actinobacteria(100);unclassified(100);unclassified(100);unclassified(100);
Otu00611	321	Bacteria(100);"Proteobacteria"(100);Betaproteobacteria(100);Burkholderiales(100);Burkholderiaceae(100);Burkholderia(100);
Otu00612	321	Bacteria(100);Firmicutes(100);Bacilli(100);Bacillales(100);Planococcaceae(100);unclassified(100);
Otu00613	319	Bacteria(100);"Bacteroidetes"(100);Flavobacteria(100);"Flavobacteriales"(100);Cryomorphaceae(100);Wandonia(100);
Otu00614	317	Bacteria(100);"Gemmatimonadetes"(100);Gemmatimonadetes(100);Gemmatimonadales(100);Gemmatimonadaceae(100);Gemmatimonas(100);
Otu00615	317	Bacteria(100);"Proteobacteria"(100);Betaproteobacteria(100);Rhodocyclales(74);Rhodocyclaceae(74);unclassified(74);
Otu00616	317	Bacteria(100);unclassified(100);unclassified(100);unclassified(100);unclassified(100);unclassified(100);
Otu00617	316	Bacteria(100);"Actinobacteria"(100);Actinobacteria(100);Acidimicrobiales(100);unclassified(100);unclassified(100);
Otu00618	315	Bacteria(100);unclassified(100);unclassified(100);unclassified(100);unclassified(100);unclassified(100);
Otu00619	315	Bacteria(100);Firmicutes(100);Bacilli(100);Bacillales(100);Paenibacillaceae_1(100);Paenibacillus(100);
Otu00620	315	Bacteria(100);"Nitrospira"(100);"Nitrospira"(100);"Nitrospirales"(100);"Nitrospiraceae"(100);Nitrospira(100);
Otu00621	315	Bacteria(100);"Verrucomicrobia"(100);Subdivision3(100);Subdivision3_order_incertae_sedis(100);Subdivision3_family_incertae_sedis(100);3_genus_incertae_sedis(100);
Otu00622	314	Bacteria(100);"Proteobacteria"(100);Alphaproteobacteria(100);Rhodospirillales(100);unclassified(100);unclassified(100);
Otu00623	313	Bacteria(100);"Proteobacteria"(100);Alphaproteobacteria(100);Caulobacterales(100);Caulobacteraceae(100);Phenylobacterium(100);
Otu00624	312	Bacteria(100);"Acidobacteria"(100);Acidobacteria_Gp17(100);Acidobacteria_Gp17_order_incertae_sedis(100);Acidobacteria_Gp17_family_incertae_sedis(100);Gp17(100);
Otu00625	311	Bacteria(100);unclassified(100);unclassified(100);unclassified(100);unclassified(100);unclassified(100);
Otu00626	310	Bacteria(100);"Planctomycetes"(100);"Planctomycetacia"(100);Planctomycetales(100);Planctomycetaceae(100);Singulisphaera(100);
Otu00627	310	Bacteria(100);"Bacteroidetes"(100);unclassified(100);unclassified(100);unclassified(100);unclassified(100);
Otu00628	309	Bacteria(100);Firmicutes(100);Bacilli(100);Bacillales(100);Paenibacillaceae_1(100);Paenibacillus(52);
Otu00629	309	Bacteria(100);"Acidobacteria"(100);Acidobacteria_Gp3(100);Acidobacteria_Gp3_order_incertae_sedis(100);Acidobacteria_Gp3_family_incertae_sedis(100);Gp3(100);
Otu00630	307	Bacteria(100);"Acidobacteria"(100);Acidobacteria_Gp6(100);Acidobacteria_Gp6_order_incertae_sedis(100);Acidobacteria_Gp6_family_incertae_sedis(100);Gp6(100);
Otu00631	307	Bacteria(100);"Proteobacteria"(100);Epsilonproteobacteria(100);Campylobacterales(100);Campylobacteraceae(100);Arcobacter(100);
Otu00632	306	Bacteria(100);Firmicutes(100);Clostridia(100);Clostridiales(100);Clostridiales_Incertae_Sedis_XI(100);Tissierella(100);
Otu00633	306	Bacteria(100);"Acidobacteria"(100);Acidobacteria_Gp1(100);Acidobacteria_Gp1_order_incertae_sedis(100);Acidobacteria_Gp1_family_incertae_sedis(100);Gp1(100);
Otu00634	306	Bacteria(100);"Actinobacteria"(100);Actinobacteria(100);Solirubrobacterales(100);Conexibacteraceae(91);Conexibacter(91);
Otu00635	305	Bacteria(100);"Proteobacteria"(100);Alphaproteobacteria(100);Rhodospirillales(100);unclassified(61);unclassified(61);
Otu00636	305	Bacteria(100);"Actinobacteria"(100);Actinobacteria(100);unclassified(100);unclassified(100);unclassified(100);
Otu00637	305	Bacteria(100);"Acidobacteria"(100);Acidobacteria_Gp4(100);Acidobacteria_Gp4_order_incertae_sedis(100);Acidobacteria_Gp4_family_incertae_sedis(100);Gp4(100);
Otu00638	304	Bacteria(100);unclassified(100);unclassified(100);unclassified(100);unclassified(100);unclassified(100);
Otu00639	304	Bacteria(100);"Proteobacteria"(100);Alphaproteobacteria(100);unclassified(100);unclassified(100);unclassified(100);
Otu00640	302	Bacteria(100);"Proteobacteria"(100);Alphaproteobacteria(100);unclassified(77);unclassified(77);unclassified(77);
Otu00641	301	Bacteria(100);unclassified(100);unclassified(100);unclassified(100);unclassified(100);unclassified(100);
Otu00642	301	Bacteria(100);unclassified(99);unclassified(99);unclassified(99);unclassified(99);unclassified(99);
Otu00643	300	Bacteria(100);"Bacteroidetes"(100);"Sphingobacteria"(100);"Sphingobacteriales"(100);Chitinophagaceae(100);unclassified(100);
Otu00644	299	Bacteria(100);unclassified(100);unclassified(100);unclassified(100);unclassified(100);unclassified(100);
Otu00645	298	Bacteria(100);"Proteobacteria"(100);Alphaproteobacteria(100);Rhizobiales(100);Xanthobacteraceae(100);Labrys(100);
Otu00646	298	Bacteria(100);"Acidobacteria"(100);Acidobacteria_Gp17(100);Acidobacteria_Gp17_order_incertae_sedis(100);Acidobacteria_Gp17_family_incertae_sedis(100);Gp17(100);
Otu00647	297	Bacteria(100);"Proteobacteria"(100);Alphaproteobacteria(100);Rhizobiales(100);unclassified(100);unclassified(100);
Otu00648	297	Bacteria(100);Firmicutes(100);Bacilli(100);Bacillales(100);Paenibacillaceae_1(100);unclassified(98);
Otu00649	295	Bacteria(100);"Actinobacteria"(100);Actinobacteria(100);unclassified(100);unclassified(100);unclassified(100);
Otu00650	295	Bacteria(100);"Proteobacteria"(100);Deltaproteobacteria(100);Myxococcales(100);unclassified(100);unclassified(100);
Otu00651	295	Bacteria(100);"Bacteroidetes"(100);"Sphingobacteria"(100);"Sphingobacteriales"(100);Chitinophagaceae(100);Chitinophaga(54);
Otu00652	294	Bacteria(100);"Planctomycetes"(100);"Planctomycetacia"(100);Planctomycetales(100);Planctomycetaceae(100);Singulisphaera(100);
Otu00653	292	Bacteria(100);unclassified(100);unclassified(100);unclassified(100);unclassified(100);unclassified(100);
Otu00654	291	Bacteria(100);"Verrucomicrobia"(100);Subdivision3(100);Subdivision3_order_incertae_sedis(100);Subdivision3_family_incertae_sedis(100);3_genus_incertae_sedis(100);
Otu00655	291	Bacteria(100);"Verrucomicrobia"(100);Spartobacteria(100);Spartobacteria_order_incertae_sedis(100);Spartobacteria_family_incertae_sedis(100);Spartobacteria_genera_incertae_sedis(100);
Otu00656	291	Bacteria(100);"Proteobacteria"(100);Alphaproteobacteria(100);Sphingomonadales(100);Sphingomonadaceae(100);Sphingobium(100);
Otu00657	290	Bacteria(100);unclassified(100);unclassified(100);unclassified(100);unclassified(100);unclassified(100);
Otu00658	288	Bacteria(100);"Proteobacteria"(100);Gammaproteobacteria(100);unclassified(100);unclassified(100);unclassified(100);
Otu00659	288	Bacteria(100);"Gemmatimonadetes"(98);Gemmatimonadetes(98);Gemmatimonadales(98);Gemmatimonadaceae(98);Gemmatimonas(98);
Otu00660	287	Bacteria(100);"Proteobacteria"(100);Alphaproteobacteria(100);Rhodospirillales(100);unclassified(100);unclassified(100);
Otu00661	286	Bacteria(100);"Chloroflexi"(100);Anaerolineae(100);Anaerolineales(100);Anaerolineaceae(100);unclassified(100);
Otu00662	285	Bacteria(100);"Planctomycetes"(100);"Planctomycetacia"(100);Planctomycetales(100);Planctomycetaceae(100);unclassified(84);
Otu00663	285	Bacteria(100);"Proteobacteria"(100);Deltaproteobacteria(100);Myxococcales(100);Polyangiaceae(52);unclassified(52);
Otu00664	285	Bacteria(100);"Planctomycetes"(100);"Planctomycetacia"(100);Planctomycetales(100);Planctomycetaceae(100);unclassified(100);
Otu00665	285	Bacteria(100);"Actinobacteria"(100);Actinobacteria(100);Actinomycetales(100);Geodermatophilaceae(100);Blastococcus(87);
Otu00666	283	Bacteria(100);"Proteobacteria"(100);Alphaproteobacteria(100);Rhodospirillales(100);Rhodospirillaceae(100);unclassified(100);
Otu00667	283	Bacteria(100);unclassified(100);unclassified(100);unclassified(100);unclassified(100);unclassified(100);
Otu00668	283	Bacteria(100);"Planctomycetes"(100);"Planctomycetacia"(100);Planctomycetales(100);Planctomycetaceae(100);unclassified(51);
Otu00669	282	Bacteria(100);"Proteobacteria"(100);Alphaproteobacteria(100);Rhizobiales(100);Methylobacteriaceae(100);unclassified(100);
Otu00670	282	Bacteria(100);unclassified(100);unclassified(100);unclassified(100);unclassified(100);unclassified(100);
Otu00671	281	Bacteria(100);"Actinobacteria"(100);Actinobacteria(100);Actinomycetales(100);Micromonosporaceae(100);Catellatospora(60);
Otu00672	280	Bacteria(100);unclassified(100);unclassified(100);unclassified(100);unclassified(100);unclassified(100);
Otu00673	278	Bacteria(100);"Gemmatimonadetes"(100);Gemmatimonadetes(100);Gemmatimonadales(100);Gemmatimonadaceae(100);Gemmatimonas(100);
Otu00674	278	Bacteria(100);"Acidobacteria"(100);Acidobacteria_Gp17(100);Acidobacteria_Gp17_order_incertae_sedis(100);Acidobacteria_Gp17_family_incertae_sedis(100);Gp17(100);
Otu00675	277	Bacteria(100);"Proteobacteria"(100);Gammaproteobacteria(100);Xanthomonadales(100);Xanthomonadaceae(100);unclassified(100);
Otu00676	277	Bacteria(100);"Bacteroidetes"(100);"Sphingobacteria"(100);"Sphingobacteriales"(100);Chitinophagaceae(100);unclassified(100);
Otu00677	277	Bacteria(100);"Bacteroidetes"(100);unclassified(100);unclassified(100);unclassified(100);unclassified(100);
Otu00678	276	Bacteria(100);"Proteobacteria"(100);Deltaproteobacteria(100);Myxococcales(100);unclassified(100);unclassified(100);
Otu00679	276	Bacteria(100);"Proteobacteria"(100);Deltaproteobacteria(100);Myxococcales(100);Myxococcaceae(95);unclassified(95);
Otu00680	275	Bacteria(100);"Proteobacteria"(100);unclassified(100);unclassified(100);unclassified(100);unclassified(100);
Otu00681	275	Bacteria(100);"Bacteroidetes"(100);"Sphingobacteria"(100);"Sphingobacteriales"(100);Chitinophagaceae(100);unclassified(100);
Otu00682	275	Bacteria(100);unclassified(97);unclassified(97);unclassified(97);unclassified(97);unclassified(97);
Otu00683	274	Bacteria(100);"Planctomycetes"(100);"Planctomycetacia"(100);Planctomycetales(100);Planctomycetaceae(100);unclassified(100);
Otu00684	274	Bacteria(100);"Verrucomicrobia"(100);Subdivision3(100);Subdivision3_order_incertae_sedis(100);Subdivision3_family_incertae_sedis(100);3_genus_incertae_sedis(100);
Otu00685	272	Bacteria(100);"Proteobacteria"(100);Alphaproteobacteria(100);Caulobacterales(100);Caulobacteraceae(100);Caulobacter(55);
Otu00686	272	Bacteria(100);"Actinobacteria"(100);Actinobacteria(100);Acidimicrobiales(98);unclassified(97);unclassified(97);
Otu00687	271	Bacteria(100);"Planctomycetes"(100);"Planctomycetacia"(100);Planctomycetales(100);Planctomycetaceae(100);Gemmata(100);
Otu00688	270	Bacteria(100);"Bacteroidetes"(100);"Sphingobacteria"(100);"Sphingobacteriales"(100);Sphingobacteriaceae(100);unclassified(100);
Otu00689	269	Bacteria(100);"Proteobacteria"(100);Epsilonproteobacteria(100);Campylobacterales(100);Helicobacteraceae(100);Sulfurimonas(100);
Otu00690	269	Bacteria(100);"Proteobacteria"(100);Gammaproteobacteria(100);Pseudomonadales(100);Pseudomonadaceae(100);Pseudomonas(100);
Otu00691	269	Bacteria(100);"Actinobacteria"(100);Actinobacteria(100);Solirubrobacterales(100);unclassified(95);unclassified(95);
Otu00692	269	Bacteria(100);"Actinobacteria"(100);Actinobacteria(100);Acidimicrobiales(100);Acidimicrobiaceae(100);Ilumatobacter(100);
Otu00693	268	Bacteria(100);unclassified(100);unclassified(100);unclassified(100);unclassified(100);unclassified(100);
Otu00694	268	Bacteria(100);"Chloroflexi"(100);Thermomicrobia(81);unclassified(56);unclassified(56);unclassified(56);
Otu00695	267	Bacteria(100);"Verrucomicrobia"(100);Subdivision3(100);Subdivision3_order_incertae_sedis(100);Subdivision3_family_incertae_sedis(100);3_genus_incertae_sedis(100);
Otu00696	267	Bacteria(100);Firmicutes(100);Bacilli(100);Bacillales(100);Pasteuriaceae(100);Pasteuria(100);
Otu00697	266	Bacteria(100);"Actinobacteria"(100);Actinobacteria(100);Acidimicrobiales(100);Acidimicrobiaceae(95);Ilumatobacter(95);
Otu00698	266	Bacteria(100);unclassified(99);unclassified(99);unclassified(99);unclassified(99);unclassified(99);
Otu00699	266	Bacteria(100);"Proteobacteria"(100);Betaproteobacteria(100);Burkholderiales(100);Alcaligenaceae(100);Castellaniella(100);
Otu00700	266	Bacteria(100);"Gemmatimonadetes"(100);Gemmatimonadetes(100);Gemmatimonadales(100);Gemmatimonadaceae(100);Gemmatimonas(100);
Otu00701	266	Bacteria(100);"Verrucomicrobia"(100);Subdivision3(100);Subdivision3_order_incertae_sedis(100);Subdivision3_family_incertae_sedis(100);3_genus_incertae_sedis(100);
Otu00702	265	Bacteria(100);unclassified(100);unclassified(100);unclassified(100);unclassified(100);unclassified(100);
Otu00703	265	Bacteria(100);unclassified(100);unclassified(100);unclassified(100);unclassified(100);unclassified(100);
Otu00704	265	Bacteria(100);Firmicutes(100);Bacilli(100);Bacillales(100);Pasteuriaceae(100);Pasteuria(100);
Otu00705	265	Bacteria(100);unclassified(100);unclassified(100);unclassified(100);unclassified(100);unclassified(100);
Otu00706	265	Bacteria(100);"Proteobacteria"(100);unclassified(100);unclassified(100);unclassified(100);unclassified(100);
Otu00707	264	Bacteria(100);unclassified(100);unclassified(100);unclassified(100);unclassified(100);unclassified(100);
Otu00708	264	Bacteria(100);"Proteobacteria"(93);unclassified(93);unclassified(93);unclassified(93);unclassified(93);
Otu00709	264	Bacteria(100);"Actinobacteria"(100);Actinobacteria(100);Actinomycetales(100);Nocardiaceae(100);Williamsia(100);
Otu00710	264	Bacteria(100);"Verrucomicrobia"(100);Spartobacteria(98);Spartobacteria_order_incertae_sedis(98);Spartobacteria_family_incertae_sedis(98);Spartobacteria_genera_incertae_sedis(98);
Otu00711	264	Bacteria(100);"Actinobacteria"(100);Actinobacteria(100);Acidimicrobiales(92);unclassified(92);unclassified(92);
Otu00712	263	Bacteria(100);"Proteobacteria"(100);Deltaproteobacteria(100);Desulfuromonadales(100);Geobacteraceae(100);Geobacter(100);
Otu00713	262	Bacteria(100);"Planctomycetes"(100);"Planctomycetacia"(100);Planctomycetales(100);Planctomycetaceae(100);Planctomyces(100);
Otu00714	262	Bacteria(100);"Proteobacteria"(100);Alphaproteobacteria(100);Rhizobiales(100);Hyphomicrobiaceae(100);Rhodomicrobium(100);
Otu00715	262	Bacteria(100);unclassified(100);unclassified(100);unclassified(100);unclassified(100);unclassified(100);
Otu00716	261	Bacteria(100);"Verrucomicrobia"(100);Spartobacteria(89);Spartobacteria_order_incertae_sedis(89);Spartobacteria_family_incertae_sedis(89);Spartobacteria_genera_incertae_sedis(89);
Otu00717	261	Bacteria(100);"Verrucomicrobia"(100);Subdivision3(100);Subdivision3_order_incertae_sedis(100);Subdivision3_family_incertae_sedis(100);3_genus_incertae_sedis(100);
Otu00718	261	Bacteria(100);"Bacteroidetes"(100);"Bacteroidetes"_incertae_sedis_class_incertae_sedis(91);"Bacteroidetes"_incertae_sedis_order_incertae_sedis(91);"Bacteroidetes"_incertae_sedis_family_incertae_sedis(91);Ohtaekwangia(91);
Otu00719	260	Bacteria(100);"Planctomycetes"(100);"Planctomycetacia"(100);Planctomycetales(100);Planctomycetaceae(100);unclassified(100);
Otu00720	260	Bacteria(100);unclassified(100);unclassified(100);unclassified(100);unclassified(100);unclassified(100);
Otu00721	260	Bacteria(100);"Verrucomicrobia"(100);Subdivision3(100);Subdivision3_order_incertae_sedis(100);Subdivision3_family_incertae_sedis(100);3_genus_incertae_sedis(100);
Otu00722	259	Bacteria(100);"Planctomycetes"(100);"Planctomycetacia"(100);Planctomycetales(100);Planctomycetaceae(100);Planctomyces(100);
Otu00723	259	Bacteria(100);"Actinobacteria"(100);Actinobacteria(100);Solirubrobacterales(100);Patulibacteraceae(100);Patulibacter(100);
Otu00724	259	Bacteria(100);"Verrucomicrobia"(100);Spartobacteria(100);Spartobacteria_order_incertae_sedis(100);Spartobacteria_family_incertae_sedis(100);Spartobacteria_genera_incertae_sedis(91);
Otu00725	259	Bacteria(100);"Planctomycetes"(100);"Planctomycetacia"(100);Planctomycetales(100);Planctomycetaceae(100);Zavarzinella(100);
Otu00726	259	Bacteria(100);"Bacteroidetes"(100);"Sphingobacteria"(100);"Sphingobacteriales"(100);Chitinophagaceae(100);unclassified(100);
Otu00727	259	Bacteria(100);"Bacteroidetes"(100);unclassified(100);unclassified(100);unclassified(100);unclassified(100);
Otu00728	258	Bacteria(100);"Planctomycetes"(100);"Planctomycetacia"(100);Planctomycetales(100);Planctomycetaceae(100);Blastopirellula(100);
Otu00729	258	Bacteria(100);"Proteobacteria"(100);Alphaproteobacteria(100);unclassified(72);unclassified(72);unclassified(72);
Otu00730	258	Bacteria(100);unclassified(100);unclassified(100);unclassified(100);unclassified(100);unclassified(100);
Otu00731	256	Bacteria(100);unclassified(94);unclassified(94);unclassified(94);unclassified(94);unclassified(94);
Otu00732	256	Bacteria(100);unclassified(78);unclassified(78);unclassified(78);unclassified(78);unclassified(78);
Otu00733	256	Bacteria(100);unclassified(100);unclassified(100);unclassified(100);unclassified(100);unclassified(100);
Otu00734	255	Bacteria(100);"Nitrospira"(100);"Nitrospira"(100);"Nitrospirales"(100);"Nitrospiraceae"(100);Nitrospira(100);
Otu00735	255	Bacteria(100);"Planctomycetes"(100);"Planctomycetacia"(100);Planctomycetales(100);Planctomycetaceae(100);unclassified(97);
Otu00736	254	Bacteria(100);"Proteobacteria"(100);Alphaproteobacteria(100);unclassified(100);unclassified(100);unclassified(100);
Otu00737	254	Bacteria(100);"Planctomycetes"(100);"Planctomycetacia"(100);Planctomycetales(100);Planctomycetaceae(100);Planctomyces(100);
Otu00738	253	Bacteria(100);"Proteobacteria"(100);Alphaproteobacteria(100);Rhizobiales(100);unclassified(100);unclassified(100);
Otu00739	253	Bacteria(100);"Bacteroidetes"(100);unclassified(100);unclassified(100);unclassified(100);unclassified(100);
Otu00740	253	Bacteria(100);"Proteobacteria"(100);unclassified(100);unclassified(100);unclassified(100);unclassified(100);
Otu00741	253	Bacteria(100);"Planctomycetes"(100);"Planctomycetacia"(100);Planctomycetales(100);Planctomycetaceae(100);Planctomyces(100);
Otu00742	252	Bacteria(100);"Chloroflexi"(100);Thermomicrobia(100);unclassified(96);unclassified(96);unclassified(96);
Otu00743	252	Bacteria(100);"Proteobacteria"(100);Alphaproteobacteria(100);Sphingomonadales(100);Erythrobacteraceae(100);unclassified(100);
Otu00744	252	Bacteria(100);"Actinobacteria"(100);Actinobacteria(100);Actinomycetales(100);Streptosporangiaceae(100);Nonomuraea(100);
Otu00745	251	Bacteria(100);"Actinobacteria"(100);Actinobacteria(100);Acidimicrobiales(99);unclassified(99);unclassified(99);
Otu00746	251	Bacteria(100);"Gemmatimonadetes"(99);Gemmatimonadetes(99);Gemmatimonadales(99);Gemmatimonadaceae(99);Gemmatimonas(99);
Otu00747	251	Bacteria(100);"Acidobacteria"(100);Acidobacteria_Gp1(100);Acidobacteria_Gp1_order_incertae_sedis(100);Acidobacteria_Gp1_family_incertae_sedis(100);Gp1(100);
Otu00748	251	Bacteria(100);"Proteobacteria"(100);Alphaproteobacteria(100);Rhizobiales(100);Xanthobacteraceae(53);unclassified(53);
Otu00749	251	Bacteria(100);"Chloroflexi"(99);unclassified(98);unclassified(98);unclassified(98);unclassified(98);
Otu00750	250	Bacteria(100);unclassified(100);unclassified(100);unclassified(100);unclassified(100);unclassified(100);
Otu00751	250	Bacteria(100);"Proteobacteria"(100);Alphaproteobacteria(100);Rhizobiales(100);Hyphomicrobiaceae(100);Hyphomicrobium(78);
Otu00752	249	Bacteria(100);Firmicutes(100);Bacilli(100);Bacillales(100);Pasteuriaceae(100);Pasteuria(100);
Otu00753	248	Bacteria(100);unclassified(100);unclassified(100);unclassified(100);unclassified(100);unclassified(100);
Otu00754	248	Bacteria(100);"Proteobacteria"(100);Alphaproteobacteria(100);Rhodospirillales(100);unclassified(100);unclassified(100);
Otu00755	248	Bacteria(100);"Proteobacteria"(100);Deltaproteobacteria(100);Myxococcales(100);unclassified(100);unclassified(100);
Otu00756	248	Bacteria(100);"Acidobacteria"(100);Acidobacteria_Gp17(100);Acidobacteria_Gp17_order_incertae_sedis(100);Acidobacteria_Gp17_family_incertae_sedis(100);Gp17(100);
Otu00757	247	Bacteria(100);"Actinobacteria"(100);Actinobacteria(100);Acidimicrobiales(100);unclassified(100);unclassified(100);
Otu00758	247	Bacteria(100);"Actinobacteria"(100);Actinobacteria(100);Solirubrobacterales(100);Solirubrobacteraceae(66);Solirubrobacter(66);
Otu00759	246	Bacteria(100);"Proteobacteria"(100);Deltaproteobacteria(100);Myxococcales(100);unclassified(100);unclassified(100);
Otu00760	245	Bacteria(100);"Planctomycetes"(100);"Planctomycetacia"(100);Planctomycetales(100);Planctomycetaceae(100);unclassified(56);
Otu00761	245	Bacteria(100);"Planctomycetes"(92);"Planctomycetacia"(92);Planctomycetales(92);Planctomycetaceae(92);unclassified(92);
Otu00762	245	Bacteria(100);"Acidobacteria"(100);Acidobacteria_Gp5(100);Acidobacteria_Gp5_order_incertae_sedis(100);Acidobacteria_Gp5_family_incertae_sedis(100);Gp5(100);
Otu00763	244	Bacteria(100);unclassified(100);unclassified(100);unclassified(100);unclassified(100);unclassified(100);
Otu00764	244	Bacteria(100);"Actinobacteria"(100);Actinobacteria(100);Acidimicrobiales(100);unclassified(100);unclassified(100);
Otu00765	244	Bacteria(100);Firmicutes(100);Bacilli(100);Lactobacillales(100);Leuconostocaceae(100);Leuconostoc(100);
Otu00766	243	Bacteria(100);"Actinobacteria"(100);Actinobacteria(100);Actinomycetales(100);Nocardioidaceae(100);Nocardioides(100);
Otu00767	243	Bacteria(100);WS3(95);WS3_class_incertae_sedis(95);WS3_order_incertae_sedis(95);WS3_family_incertae_sedis(95);WS3_genus_incertae_sedis(95);
Otu00768	242	Bacteria(100);"Planctomycetes"(100);"Planctomycetacia"(100);Planctomycetales(100);Planctomycetaceae(100);unclassified(100);
Otu00769	241	Bacteria(100);"Actinobacteria"(100);Actinobacteria(100);Acidimicrobiales(100);unclassified(100);unclassified(100);
Otu00770	241	Bacteria(100);"Bacteroidetes"(100);"Sphingobacteria"(100);"Sphingobacteriales"(100);Chitinophagaceae(100);unclassified(100);
Otu00771	241	Bacteria(100);Firmicutes(100);Clostridia(100);Clostridiales(100);Clostridiaceae_1(100);Clostridium_sensu_stricto(100);
Otu00772	240	Bacteria(100);"Planctomycetes"(100);"Planctomycetacia"(100);Planctomycetales(100);Planctomycetaceae(100);Gemmata(98);
Otu00773	240	Bacteria(100);"Gemmatimonadetes"(100);Gemmatimonadetes(100);Gemmatimonadales(100);Gemmatimonadaceae(100);Gemmatimonas(100);
Otu00774	240	Bacteria(100);"Verrucomicrobia"(100);Subdivision3(100);Subdivision3_order_incertae_sedis(100);Subdivision3_family_incertae_sedis(100);3_genus_incertae_sedis(100);
Otu00775	240	Bacteria(100);unclassified(100);unclassified(100);unclassified(100);unclassified(100);unclassified(100);
Otu00776	240	Bacteria(100);unclassified(100);unclassified(100);unclassified(100);unclassified(100);unclassified(100);
Otu00777	240	Bacteria(100);"Proteobacteria"(100);Alphaproteobacteria(100);Rhizobiales(100);unclassified(87);unclassified(87);
Otu00778	240	Bacteria(100);unclassified(100);unclassified(100);unclassified(100);unclassified(100);unclassified(100);
Otu00779	239	Bacteria(100);"Proteobacteria"(100);Gammaproteobacteria(100);unclassified(100);unclassified(100);unclassified(100);
Otu00780	239	Bacteria(100);unclassified(100);unclassified(100);unclassified(100);unclassified(100);unclassified(100);
Otu00781	239	Bacteria(100);"Verrucomicrobia"(100);Subdivision3(100);Subdivision3_order_incertae_sedis(100);Subdivision3_family_incertae_sedis(100);3_genus_incertae_sedis(100);
Otu00782	238	Bacteria(100);"Proteobacteria"(100);Betaproteobacteria(100);unclassified(100);unclassified(100);unclassified(100);
Otu00783	237	Bacteria(100);"Acidobacteria"(100);Acidobacteria_Gp17(100);Acidobacteria_Gp17_order_incertae_sedis(100);Acidobacteria_Gp17_family_incertae_sedis(100);Gp17(100);
Otu00784	237	Bacteria(100);"Verrucomicrobia"(100);Verrucomicrobiae(100);Verrucomicrobiales(100);Verrucomicrobiaceae(100);Verrucomicrobium(100);
Otu00785	236	Bacteria(100);unclassified(100);unclassified(100);unclassified(100);unclassified(100);unclassified(100);
Otu00786	236	Bacteria(100);unclassified(100);unclassified(100);unclassified(100);unclassified(100);unclassified(100);
Otu00787	235	Bacteria(100);"Planctomycetes"(100);"Planctomycetacia"(100);Planctomycetales(100);Planctomycetaceae(100);unclassified(92);
Otu00788	235	Bacteria(100);"Acidobacteria"(100);Acidobacteria_Gp4(100);Acidobacteria_Gp4_order_incertae_sedis(100);Acidobacteria_Gp4_family_incertae_sedis(100);Gp4(100);
Otu00789	234	Bacteria(100);"Proteobacteria"(100);Deltaproteobacteria(98);unclassified(98);unclassified(98);unclassified(98);
Otu00790	234	Bacteria(100);unclassified(100);unclassified(100);unclassified(100);unclassified(100);unclassified(100);
Otu00791	234	Bacteria(100);"Bacteroidetes"(100);"Sphingobacteria"(100);"Sphingobacteriales"(100);Sphingobacteriaceae(100);Mucilaginibacter(63);
Otu00792	234	Bacteria(100);"Proteobacteria"(100);Alphaproteobacteria(100);Rhodospirillales(100);unclassified(100);unclassified(100);
Otu00793	234	Bacteria(100);"Bacteroidetes"(100);"Sphingobacteria"(100);"Sphingobacteriales"(100);Chitinophagaceae(100);unclassified(100);
Otu00794	232	Bacteria(100);"Planctomycetes"(97);"Planctomycetacia"(97);Planctomycetales(97);Planctomycetaceae(97);unclassified(97);
Otu00795	232	Bacteria(100);"Proteobacteria"(100);Gammaproteobacteria(100);Legionellales(100);Coxiellaceae(100);Aquicella(100);
Otu00796	232	Bacteria(100);"Proteobacteria"(100);Betaproteobacteria(100);Burkholderiales(100);Comamonadaceae(100);unclassified(100);
Otu00797	231	Bacteria(100);"Bacteroidetes"(100);unclassified(100);unclassified(100);unclassified(100);unclassified(100);
Otu00798	231	Bacteria(100);"Planctomycetes"(100);"Planctomycetacia"(100);Planctomycetales(100);Planctomycetaceae(100);Singulisphaera(100);
Otu00799	231	Bacteria(100);unclassified(100);unclassified(100);unclassified(100);unclassified(100);unclassified(100);
Otu00800	231	Bacteria(100);"Proteobacteria"(100);Gammaproteobacteria(100);Pseudomonadales(100);Pseudomonadaceae(100);Pseudomonas(100);
Otu00801	230	Bacteria(100);unclassified(100);unclassified(100);unclassified(100);unclassified(100);unclassified(100);
Otu00802	229	Bacteria(100);"Proteobacteria"(100);Gammaproteobacteria(100);Xanthomonadales(100);Xanthomonadaceae(100);Pseudoxanthomonas(99);
Otu00803	229	Bacteria(100);"Planctomycetes"(100);"Planctomycetacia"(100);Planctomycetales(100);Planctomycetaceae(100);Singulisphaera(100);
Otu00804	228	Bacteria(100);"Gemmatimonadetes"(100);Gemmatimonadetes(100);Gemmatimonadales(100);Gemmatimonadaceae(100);Gemmatimonas(100);
Otu00805	228	Bacteria(100);"Proteobacteria"(100);Gammaproteobacteria(100);unclassified(100);unclassified(100);unclassified(100);
Otu00806	228	Bacteria(100);"Acidobacteria"(100);Acidobacteria_Gp17(100);Acidobacteria_Gp17_order_incertae_sedis(100);Acidobacteria_Gp17_family_incertae_sedis(100);Gp17(100);
Otu00807	228	Bacteria(100);"Proteobacteria"(100);Deltaproteobacteria(100);unclassified(100);unclassified(100);unclassified(100);
Otu00808	227	Bacteria(100);"Actinobacteria"(100);Actinobacteria(100);Actinomycetales(100);Cellulomonadaceae(93);Cellulomonas(93);
Otu00809	227	Bacteria(100);"Bacteroidetes"(100);Flavobacteria(100);"Flavobacteriales"(100);Flavobacteriaceae(100);unclassified(74);
Otu00810	226	Bacteria(100);"Acidobacteria"(100);Acidobacteria_Gp2(100);Acidobacteria_Gp2_order_incertae_sedis(100);Acidobacteria_Gp2_family_incertae_sedis(100);Gp2(100);
Otu00811	226	Bacteria(100);"Planctomycetes"(98);"Planctomycetacia"(98);Planctomycetales(98);Planctomycetaceae(98);unclassified(98);
Otu00812	226	Bacteria(100);unclassified(100);unclassified(100);unclassified(100);unclassified(100);unclassified(100);
Otu00813	226	Bacteria(100);"Chlamydiae"(100);Chlamydiae(100);Chlamydiales(100);Parachlamydiaceae(100);unclassified(86);
Otu00814	226	Bacteria(100);"Bacteroidetes"(100);"Bacteroidia"(100);"Bacteroidales"(100);"Porphyromonadaceae"(100);Petrimonas(99);
Otu00815	225	Bacteria(100);"Proteobacteria"(100);unclassified(91);unclassified(91);unclassified(91);unclassified(91);
Otu00816	224	Bacteria(100);"Proteobacteria"(94);unclassified(57);unclassified(57);unclassified(57);unclassified(57);
Otu00817	224	Bacteria(100);"Verrucomicrobia"(100);Subdivision3(100);Subdivision3_order_incertae_sedis(100);Subdivision3_family_incertae_sedis(100);3_genus_incertae_sedis(100);
Otu00818	223	Bacteria(100);"Verrucomicrobia"(100);Spartobacteria(100);Spartobacteria_order_incertae_sedis(100);Spartobacteria_family_incertae_sedis(100);Spartobacteria_genera_incertae_sedis(100);
Otu00819	223	Bacteria(100);"Planctomycetes"(100);"Planctomycetacia"(100);Planctomycetales(100);Planctomycetaceae(100);Zavarzinella(96);
Otu00820	223	Bacteria(100);"Proteobacteria"(100);Gammaproteobacteria(100);Legionellales(100);Coxiellaceae(100);Aquicella(100);
Otu00821	223	Bacteria(100);"Bacteroidetes"(100);"Sphingobacteria"(100);"Sphingobacteriales"(100);Cytophagaceae(100);Cytophaga(100);
Otu00822	222	Bacteria(100);"Chloroflexi"(100);Caldilineae(100);Caldilineales(100);Caldilineaceae(100);Caldilinea(100);
Otu00823	222	Bacteria(100);"Verrucomicrobia"(51);unclassified(51);unclassified(51);unclassified(51);unclassified(51);
Otu00824	222	Bacteria(100);"Proteobacteria"(100);Alphaproteobacteria(100);Rhodobacterales(100);Rhodobacteraceae(100);unclassified(89);
Otu00825	221	Bacteria(100);unclassified(100);unclassified(100);unclassified(100);unclassified(100);unclassified(100);
Otu00826	221	Bacteria(100);"Planctomycetes"(100);"Planctomycetacia"(100);Planctomycetales(100);Planctomycetaceae(100);Singulisphaera(100);
Otu00827	220	Bacteria(100);"Actinobacteria"(100);Actinobacteria(100);unclassified(66);unclassified(66);unclassified(66);
Otu00828	219	Bacteria(100);"Actinobacteria"(100);Actinobacteria(100);unclassified(100);unclassified(100);unclassified(100);
Otu00829	219	Bacteria(100);"Actinobacteria"(100);Actinobacteria(100);Actinomycetales(85);unclassified(100);unclassified(100);
Otu00830	219	Bacteria(100);"Planctomycetes"(100);"Planctomycetacia"(100);Planctomycetales(100);Planctomycetaceae(100);Singulisphaera(100);
Otu00831	219	Bacteria(100);"Gemmatimonadetes"(100);Gemmatimonadetes(100);Gemmatimonadales(100);Gemmatimonadaceae(100);Gemmatimonas(100);
Otu00832	219	Bacteria(100);"Proteobacteria"(100);Alphaproteobacteria(100);Rhodospirillales(100);unclassified(99);unclassified(99);
Otu00833	218	Bacteria(100);unclassified(100);unclassified(100);unclassified(100);unclassified(100);unclassified(100);
Otu00834	218	Bacteria(100);unclassified(100);unclassified(100);unclassified(100);unclassified(100);unclassified(100);
Otu00835	217	Bacteria(100);"Bacteroidetes"(100);unclassified(99);unclassified(99);unclassified(99);unclassified(99);
Otu00836	217	Bacteria(100);unclassified(100);unclassified(100);unclassified(100);unclassified(100);unclassified(100);
Otu00837	217	Bacteria(100);"Proteobacteria"(100);Betaproteobacteria(100);unclassified(100);unclassified(100);unclassified(100);
Otu00838	217	Bacteria(100);"Proteobacteria"(100);Deltaproteobacteria(100);Myxococcales(100);unclassified(98);unclassified(98);
Otu00839	217	Bacteria(100);unclassified(100);unclassified(100);unclassified(100);unclassified(100);unclassified(100);
Otu00840	216	Bacteria(100);"Proteobacteria"(100);unclassified(99);unclassified(99);unclassified(99);unclassified(99);
Otu00841	215	Bacteria(100);unclassified(100);unclassified(100);unclassified(100);unclassified(100);unclassified(100);
Otu00842	215	Bacteria(100);unclassified(100);unclassified(100);unclassified(100);unclassified(100);unclassified(100);
Otu00843	214	Bacteria(100);"Bacteroidetes"(100);unclassified(100);unclassified(100);unclassified(100);unclassified(100);
Otu00844	214	Bacteria(100);unclassified(100);unclassified(100);unclassified(100);unclassified(100);unclassified(100);
Otu00845	213	Bacteria(100);"Bacteroidetes"(100);"Sphingobacteria"(100);"Sphingobacteriales"(100);Sphingobacteriaceae(100);Olivibacter(99);
Otu00846	213	Bacteria(100);"Planctomycetes"(100);"Planctomycetacia"(100);Planctomycetales(100);Planctomycetaceae(100);unclassified(100);
Otu00847	213	Bacteria(100);"Planctomycetes"(100);"Planctomycetacia"(100);Planctomycetales(100);Planctomycetaceae(100);Zavarzinella(100);
Otu00848	213	Bacteria(100);"Acidobacteria"(100);Acidobacteria_Gp3(100);Acidobacteria_Gp3_order_incertae_sedis(100);Acidobacteria_Gp3_family_incertae_sedis(100);Gp3(100);
Otu00849	212	Bacteria(100);"Acidobacteria"(100);Acidobacteria_Gp1(100);Acidobacteria_Gp1_order_incertae_sedis(100);Acidobacteria_Gp1_family_incertae_sedis(100);Gp1(100);
Otu00850	212	Bacteria(100);"Bacteroidetes"(100);"Sphingobacteria"(100);"Sphingobacteriales"(100);Cytophagaceae(100);Cytophaga(100);
Otu00851	212	Bacteria(100);"Proteobacteria"(100);Alphaproteobacteria(100);Rhizobiales(100);unclassified(97);unclassified(97);
Otu00852	212	Bacteria(100);unclassified(100);unclassified(100);unclassified(100);unclassified(100);unclassified(100);
Otu00853	211	Bacteria(100);"Acidobacteria"(100);Acidobacteria_Gp5(100);Acidobacteria_Gp5_order_incertae_sedis(100);Acidobacteria_Gp5_family_incertae_sedis(100);Gp5(100);
Otu00854	210	Bacteria(100);"Bacteroidetes"(100);unclassified(100);unclassified(100);unclassified(100);unclassified(100);
Otu00855	210	Bacteria(100);"Proteobacteria"(100);Alphaproteobacteria(100);unclassified(99);unclassified(99);unclassified(99);
Otu00856	210	Bacteria(100);"Acidobacteria"(100);Acidobacteria_Gp16(100);Acidobacteria_Gp16_order_incertae_sedis(100);Acidobacteria_Gp16_family_incertae_sedis(100);Gp16(100);
Otu00857	209	Bacteria(100);"Proteobacteria"(100);Deltaproteobacteria(100);Myxococcales(99);unclassified(99);unclassified(99);
Otu00858	209	Bacteria(100);"Acidobacteria"(100);Acidobacteria_Gp3(100);Acidobacteria_Gp3_order_incertae_sedis(100);Acidobacteria_Gp3_family_incertae_sedis(100);Gp3(100);
Otu00859	209	Bacteria(100);"Proteobacteria"(100);Alphaproteobacteria(100);unclassified(100);unclassified(100);unclassified(100);
Otu00860	209	Bacteria(100);unclassified(100);unclassified(100);unclassified(100);unclassified(100);unclassified(100);
Otu00861	208	Bacteria(100);"Proteobacteria"(100);Alphaproteobacteria(100);Caulobacterales(100);Caulobacteraceae(100);Phenylobacterium(100);
Otu00862	208	Bacteria(100);"Acidobacteria"(100);Acidobacteria_Gp17(100);Acidobacteria_Gp17_order_incertae_sedis(100);Acidobacteria_Gp17_family_incertae_sedis(100);Gp17(100);
Otu00863	208	Bacteria(100);unclassified(100);unclassified(100);unclassified(100);unclassified(100);unclassified(100);
Otu00864	207	Bacteria(100);Firmicutes(100);Bacilli(100);Bacillales(100);Paenibacillaceae_1(100);Paenibacillus(97);
Otu00865	207	Bacteria(100);"Proteobacteria"(100);Alphaproteobacteria(100);unclassified(100);unclassified(100);unclassified(100);
Otu00866	207	Bacteria(100);Firmicutes(99);Bacilli(99);Bacillales(99);Pasteuriaceae(99);Pasteuria(99);
Otu00867	207	Bacteria(100);"Bacteroidetes"(100);unclassified(100);unclassified(100);unclassified(100);unclassified(100);
Otu00869	207	Bacteria(100);"Acidobacteria"(100);Acidobacteria_Gp6(100);Acidobacteria_Gp6_order_incertae_sedis(100);Acidobacteria_Gp6_family_incertae_sedis(100);Gp6(100);
Otu00870	207	Bacteria(100);"Actinobacteria"(100);Actinobacteria(100);Actinomycetales(100);Intrasporangiaceae(99);unclassified(99);
Otu00871	206	Bacteria(100);"Bacteroidetes"(100);"Sphingobacteria"(100);"Sphingobacteriales"(100);Chitinophagaceae(100);Parasegetibacter(100);
Otu00872	206	Bacteria(100);"Proteobacteria"(100);Alphaproteobacteria(100);Rhizobiales(100);Phyllobacteriaceae(100);Aquamicrobium(81);
Otu00873	206	Bacteria(100);"Planctomycetes"(100);"Planctomycetacia"(100);Planctomycetales(100);Planctomycetaceae(100);unclassified(100);
Otu00874	205	Bacteria(100);"Bacteroidetes"(100);Flavobacteria(100);"Flavobacteriales"(100);Flavobacteriaceae(100);Flavobacterium(100);
Otu00875	204	Bacteria(100);"Proteobacteria"(100);Alphaproteobacteria(100);Rhodospirillales(100);Rhodospirillaceae(100);Dongia(100);
Otu00876	203	Bacteria(100);unclassified(100);unclassified(100);unclassified(100);unclassified(100);unclassified(100);
Otu00877	203	Bacteria(100);unclassified(100);unclassified(100);unclassified(100);unclassified(100);unclassified(100);
Otu00878	203	Bacteria(100);unclassified(65);unclassified(65);unclassified(65);unclassified(65);unclassified(65);
Otu00879	202	Bacteria(100);Firmicutes(100);Bacilli(100);Bacillales(100);Pasteuriaceae(100);Pasteuria(100);
Otu00880	202	Bacteria(100);"Planctomycetes"(100);"Planctomycetacia"(100);Planctomycetales(100);Planctomycetaceae(100);unclassified(80);
Otu00881	202	Bacteria(100);"Nitrospira"(100);"Nitrospira"(100);"Nitrospirales"(100);"Nitrospiraceae"(100);Nitrospira(100);
Otu00882	202	Bacteria(100);"Acidobacteria"(100);Acidobacteria_Gp15(100);Acidobacteria_Gp15_order_incertae_sedis(100);Acidobacteria_Gp15_family_incertae_sedis(100);Gp15(100);
Otu00883	201	Bacteria(100);"Bacteroidetes"(100);"Bacteroidetes"_incertae_sedis_class_incertae_sedis(100);"Bacteroidetes"_incertae_sedis_order_incertae_sedis(100);"Bacteroidetes"_incertae_sedis_family_incertae_sedis(100);Ohtaekwangia(100);
Otu00884	201	Bacteria(100);"Chloroflexi"(95);Anaerolineae(95);Anaerolineales(95);Anaerolineaceae(95);unclassified(95);
Otu00885	201	Bacteria(100);"Acidobacteria"(100);Acidobacteria_Gp22(100);Acidobacteria_Gp22_order_incertae_sedis(100);Acidobacteria_Gp22_family_incertae_sedis(100);Gp22(100);
Otu00886	201	Bacteria(100);"Bacteroidetes"(100);"Sphingobacteria"(100);"Sphingobacteriales"(100);"Flammeovirgaceae"(97);unclassified(97);
Otu00887	201	Bacteria(100);"Proteobacteria"(100);Gammaproteobacteria(100);unclassified(100);unclassified(100);unclassified(100);
Otu00888	200	Bacteria(100);"Bacteroidetes"(100);"Sphingobacteria"(100);"Sphingobacteriales"(100);Chitinophagaceae(100);unclassified(99);
Otu00889	200	Bacteria(100);unclassified(100);unclassified(100);unclassified(100);unclassified(100);unclassified(100);
Otu00890	199	Bacteria(100);unclassified(88);unclassified(88);unclassified(88);unclassified(88);unclassified(88);
Otu00891	199	Bacteria(100);"Proteobacteria"(100);Alphaproteobacteria(100);Alphaproteobacteria_order_incertae_sedis(100);Alphaproteobacteria_family_incertae_sedis(100);Geminicoccus(100);
Otu00892	199	Bacteria(100);"Actinobacteria"(100);Actinobacteria(100);Acidimicrobiales(100);unclassified(83);unclassified(83);
Otu00893	198	Bacteria(100);"Proteobacteria"(100);unclassified(69);unclassified(69);unclassified(69);unclassified(69);
Otu00894	198	Bacteria(100);"Gemmatimonadetes"(100);Gemmatimonadetes(100);Gemmatimonadales(100);Gemmatimonadaceae(100);Gemmatimonas(100);
Otu00895	198	Bacteria(100);"Acidobacteria"(100);Acidobacteria_Gp1(100);Acidobacteria_Gp1_order_incertae_sedis(100);Acidobacteria_Gp1_family_incertae_sedis(100);Gp1(100);
Otu00896	197	Bacteria(100);"Bacteroidetes"(100);unclassified(100);unclassified(100);unclassified(100);unclassified(100);
Otu00897	197	Bacteria(100);"Proteobacteria"(100);Alphaproteobacteria(100);Caulobacterales(80);Caulobacteraceae(80);Phenylobacterium(75);
Otu00898	197	Bacteria(100);"Gemmatimonadetes"(100);Gemmatimonadetes(100);Gemmatimonadales(100);Gemmatimonadaceae(100);Gemmatimonas(100);
Otu00899	197	Bacteria(100);"Verrucomicrobia"(100);Subdivision3(100);Subdivision3_order_incertae_sedis(100);Subdivision3_family_incertae_sedis(100);3_genus_incertae_sedis(100);
Otu00900	197	Bacteria(100);"Planctomycetes"(100);"Planctomycetacia"(100);Planctomycetales(100);Planctomycetaceae(100);Rhodopirellula(100);
Otu00901	197	Bacteria(100);"Bacteroidetes"(100);"Sphingobacteria"(100);"Sphingobacteriales"(100);Chitinophagaceae(100);Terrimonas(85);
Otu00902	196	Bacteria(100);"Bacteroidetes"(100);"Bacteroidetes"_incertae_sedis_class_incertae_sedis(100);"Bacteroidetes"_incertae_sedis_order_incertae_sedis(100);"Bacteroidetes"_incertae_sedis_family_incertae_sedis(100);Ohtaekwangia(100);
Otu00903	196	Bacteria(100);unclassified(100);unclassified(100);unclassified(100);unclassified(100);unclassified(100);
Otu00904	196	Bacteria(100);unclassified(99);unclassified(99);unclassified(99);unclassified(99);unclassified(99);
Otu00905	196	Bacteria(100);"Acidobacteria"(100);Acidobacteria_Gp17(100);Acidobacteria_Gp17_order_incertae_sedis(100);Acidobacteria_Gp17_family_incertae_sedis(100);Gp17(100);
Otu00906	196	Bacteria(100);"Bacteroidetes"(100);unclassified(100);unclassified(100);unclassified(100);unclassified(100);
Otu00907	195	Bacteria(100);"Verrucomicrobia"(100);Subdivision3(100);Subdivision3_order_incertae_sedis(100);Subdivision3_family_incertae_sedis(100);3_genus_incertae_sedis(100);
Otu00908	195	Bacteria(100);"Proteobacteria"(100);Gammaproteobacteria(100);"Enterobacteriales"(100);Enterobacteriaceae(100);Yersinia(60);
Otu00909	195	Bacteria(100);"Planctomycetes"(100);"Planctomycetacia"(100);Planctomycetales(100);Planctomycetaceae(100);Gemmata(100);
Otu00910	195	Bacteria(100);"Verrucomicrobia"(100);unclassified(100);unclassified(100);unclassified(100);unclassified(100);
Otu00911	195	Bacteria(100);unclassified(100);unclassified(100);unclassified(100);unclassified(100);unclassified(100);
Otu00912	194	Bacteria(100);unclassified(100);unclassified(100);unclassified(100);unclassified(100);unclassified(100);
Otu00913	194	Bacteria(100);unclassified(100);unclassified(100);unclassified(100);unclassified(100);unclassified(100);
Otu00914	194	Bacteria(100);unclassified(53);unclassified(53);unclassified(53);unclassified(53);unclassified(53);
Otu00915	194	Bacteria(100);"Planctomycetes"(100);"Planctomycetacia"(100);Planctomycetales(100);Planctomycetaceae(100);unclassified(94);
Otu00916	193	Bacteria(100);"Acidobacteria"(100);Acidobacteria_Gp1(100);Acidobacteria_Gp1_order_incertae_sedis(100);Acidobacteria_Gp1_family_incertae_sedis(100);Gp1(100);
Otu00917	193	Bacteria(100);"Acidobacteria"(100);Acidobacteria_Gp22(100);Acidobacteria_Gp22_order_incertae_sedis(100);Acidobacteria_Gp22_family_incertae_sedis(100);Gp22(100);
Otu00918	192	Bacteria(100);"Bacteroidetes"(100);"Sphingobacteria"(100);"Sphingobacteriales"(100);Sphingobacteriaceae(100);Pedobacter(100);
Otu00919	192	Bacteria(100);"Proteobacteria"(100);Deltaproteobacteria(100);Myxococcales(100);Nannocystaceae(100);Enhygromyxa(100);
Otu00920	192	Bacteria(100);unclassified(100);unclassified(100);unclassified(100);unclassified(100);unclassified(100);
Otu00921	191	Bacteria(100);"Proteobacteria"(100);Alphaproteobacteria(100);Rhizobiales(100);unclassified(100);unclassified(100);
Otu00922	191	Bacteria(100);"Proteobacteria"(100);Betaproteobacteria(100);unclassified(100);unclassified(100);unclassified(100);
Otu00923	190	Bacteria(100);unclassified(100);unclassified(100);unclassified(100);unclassified(100);unclassified(100);
Otu00924	190	Bacteria(100);"Chlamydiae"(100);Chlamydiae(100);Chlamydiales(100);Parachlamydiaceae(100);unclassified(73);
Otu00925	189	Bacteria(100);"Proteobacteria"(100);Betaproteobacteria(100);unclassified(99);unclassified(99);unclassified(99);
Otu00926	189	Bacteria(100);"Verrucomicrobia"(100);Subdivision3(100);Subdivision3_order_incertae_sedis(100);Subdivision3_family_incertae_sedis(100);3_genus_incertae_sedis(100);
Otu00927	189	Bacteria(100);unclassified(100);unclassified(100);unclassified(100);unclassified(100);unclassified(100);
Otu00928	189	Bacteria(100);"Actinobacteria"(100);Actinobacteria(100);Actinomycetales(100);Streptosporangiaceae(100);Streptosporangium(100);
Otu00929	188	Bacteria(100);"Planctomycetes"(100);"Planctomycetacia"(100);Planctomycetales(100);Planctomycetaceae(100);unclassified(100);
Otu00930	188	Bacteria(100);unclassified(55);unclassified(55);unclassified(55);unclassified(55);unclassified(55);
Otu00931	188	Bacteria(100);"Acidobacteria"(100);Acidobacteria_Gp3(100);Acidobacteria_Gp3_order_incertae_sedis(100);Acidobacteria_Gp3_family_incertae_sedis(100);Gp3(100);
Otu00932	188	Bacteria(100);"Proteobacteria"(100);Alphaproteobacteria(100);Rhizobiales(100);Rhizobiaceae(96);Kaistia(96);
Otu00933	187	Bacteria(100);unclassified(100);unclassified(100);unclassified(100);unclassified(100);unclassified(100);
Otu00934	187	Bacteria(100);"Acidobacteria"(100);Acidobacteria_Gp3(100);Acidobacteria_Gp3_order_incertae_sedis(100);Acidobacteria_Gp3_family_incertae_sedis(100);Gp3(100);
Otu00935	187	Bacteria(100);"Proteobacteria"(100);Alphaproteobacteria(100);Rhodospirillales(100);Rhodospirillaceae(99);unclassified(98);
Otu00936	187	Bacteria(100);"Proteobacteria"(100);Betaproteobacteria(100);Burkholderiales(100);Comamonadaceae(100);unclassified(100);
Otu00937	186	Bacteria(100);"Planctomycetes"(100);"Planctomycetacia"(100);Planctomycetales(100);Planctomycetaceae(100);Singulisphaera(100);
Otu00938	186	Bacteria(100);"Acidobacteria"(100);Acidobacteria_Gp4(100);Acidobacteria_Gp4_order_incertae_sedis(100);Acidobacteria_Gp4_family_incertae_sedis(100);Gp4(100);
Otu00939	186	Bacteria(100);"Actinobacteria"(100);Actinobacteria(100);Solirubrobacterales(100);Conexibacteraceae(99);Conexibacter(99);
Otu00940	186	Bacteria(100);"Proteobacteria"(100);Deltaproteobacteria(100);Myxococcales(100);Polyangiaceae(100);Byssovorax(91);
Otu00941	186	Bacteria(100);"Acidobacteria"(100);Acidobacteria_Gp6(100);Acidobacteria_Gp6_order_incertae_sedis(100);Acidobacteria_Gp6_family_incertae_sedis(100);Gp6(100);
Otu00942	186	Bacteria(100);Firmicutes(100);unclassified(82);unclassified(82);unclassified(82);unclassified(82);
Otu00944	185	Bacteria(100);"Planctomycetes"(100);"Planctomycetacia"(100);Planctomycetales(100);Planctomycetaceae(100);Singulisphaera(100);
Otu00945	185	Bacteria(100);"Planctomycetes"(100);"Planctomycetacia"(100);Planctomycetales(100);Planctomycetaceae(100);Planctomyces(100);
Otu00946	185	Bacteria(100);"Verrucomicrobia"(100);Opitutae(100);Opitutales(100);Opitutaceae(100);unclassified(71);
Otu00947	185	Bacteria(100);unclassified(98);unclassified(98);unclassified(98);unclassified(98);unclassified(98);
Otu00948	185	Bacteria(100);"Proteobacteria"(100);Alphaproteobacteria(100);Rhodospirillales(100);unclassified(100);unclassified(100);
Otu00949	184	Bacteria(100);"Planctomycetes"(100);"Planctomycetacia"(100);Planctomycetales(100);Planctomycetaceae(100);Planctomyces(100);
Otu00950	184	Bacteria(100);"Proteobacteria"(100);Gammaproteobacteria(100);Alteromonadales(100);Shewanellaceae(100);Shewanella(100);
Otu00951	184	Bacteria(100);"Bacteroidetes"(100);"Bacteroidetes"_incertae_sedis_class_incertae_sedis(100);"Bacteroidetes"_incertae_sedis_order_incertae_sedis(100);"Bacteroidetes"_incertae_sedis_family_incertae_sedis(100);Ohtaekwangia(100);
Otu00952	184	Bacteria(100);unclassified(100);unclassified(100);unclassified(100);unclassified(100);unclassified(100);
Otu00953	184	Bacteria(100);"Acidobacteria"(100);Acidobacteria_Gp6(100);Acidobacteria_Gp6_order_incertae_sedis(100);Acidobacteria_Gp6_family_incertae_sedis(100);Gp6(100);
Otu00954	184	Bacteria(100);"Planctomycetes"(100);"Planctomycetacia"(100);Planctomycetales(100);Planctomycetaceae(100);Planctomyces(100);
Otu00955	183	Bacteria(100);"Actinobacteria"(100);Actinobacteria(100);Actinomycetales(100);Nocardioidaceae(100);Nocardioides(100);
Otu00956	183	Bacteria(100);"Planctomycetes"(100);"Planctomycetacia"(100);Planctomycetales(100);Planctomycetaceae(100);unclassified(100);
Otu00957	183	Bacteria(100);"Acidobacteria"(100);unclassified(100);unclassified(100);unclassified(100);unclassified(100);
Otu00958	183	Bacteria(100);unclassified(100);unclassified(100);unclassified(100);unclassified(100);unclassified(100);
Otu00959	183	Bacteria(100);"Planctomycetes"(100);"Planctomycetacia"(100);Planctomycetales(100);Planctomycetaceae(100);unclassified(100);
Otu00960	182	Bacteria(100);Firmicutes(100);Bacilli(100);Bacillales(100);Paenibacillaceae_1(100);Cohnella(100);
Otu00961	182	Bacteria(100);"Planctomycetes"(100);"Planctomycetacia"(100);Planctomycetales(100);Planctomycetaceae(100);Blastopirellula(81);
Otu00962	182	Bacteria(100);unclassified(100);unclassified(100);unclassified(100);unclassified(100);unclassified(100);
Otu00963	182	Bacteria(100);"Proteobacteria"(100);Betaproteobacteria(100);Burkholderiales(100);Alcaligenaceae(100);unclassified(100);
Otu00964	181	Bacteria(100);"Proteobacteria"(100);Deltaproteobacteria(65);unclassified(60);unclassified(60);unclassified(60);
Otu00965	181	Bacteria(100);"Actinobacteria"(100);Actinobacteria(100);unclassified(100);unclassified(100);unclassified(100);
Otu00966	181	Bacteria(100);"Proteobacteria"(100);Gammaproteobacteria(100);unclassified(100);unclassified(100);unclassified(100);
Otu00967	181	Bacteria(100);"Planctomycetes"(100);"Planctomycetacia"(100);Planctomycetales(100);Planctomycetaceae(100);Planctomyces(100);
Otu00968	181	Bacteria(100);"Actinobacteria"(100);Actinobacteria(100);Actinomycetales(100);unclassified(76);unclassified(76);
Otu00969	181	Bacteria(100);"Proteobacteria"(100);Deltaproteobacteria(100);Myxococcales(100);unclassified(100);unclassified(100);
Otu00970	181	Bacteria(100);unclassified(100);unclassified(100);unclassified(100);unclassified(100);unclassified(100);
Otu00971	181	Bacteria(100);unclassified(100);unclassified(100);unclassified(100);unclassified(100);unclassified(100);
Otu00972	180	Bacteria(100);Firmicutes(100);Clostridia(100);Clostridiales(100);Clostridiaceae_1(100);Clostridium_sensu_stricto(98);
Otu00973	180	Bacteria(100);"Planctomycetes"(100);"Planctomycetacia"(100);Planctomycetales(100);Planctomycetaceae(100);Gemmata(100);
Otu00974	180	Bacteria(100);unclassified(100);unclassified(100);unclassified(100);unclassified(100);unclassified(100);
Otu00975	180	Bacteria(100);"Proteobacteria"(100);Alphaproteobacteria(100);Rhizobiales(100);unclassified(99);unclassified(99);
Otu00976	180	Bacteria(100);"Proteobacteria"(100);Gammaproteobacteria(100);Legionellales(100);Legionellaceae(100);Legionella(100);
Otu00977	179	Bacteria(100);"Chloroflexi"(99);Anaerolineae(99);Anaerolineales(99);Anaerolineaceae(99);unclassified(99);
Otu00978	179	Bacteria(100);"Proteobacteria"(100);Deltaproteobacteria(100);Myxococcales(100);Polyangiaceae(100);Chondromyces(95);
Otu00979	179	Bacteria(100);"Verrucomicrobia"(100);Subdivision3(100);Subdivision3_order_incertae_sedis(100);Subdivision3_family_incertae_sedis(100);3_genus_incertae_sedis(100);
Otu00980	179	Bacteria(100);"Proteobacteria"(100);Alphaproteobacteria(100);unclassified(62);unclassified(62);unclassified(62);
Otu00981	179	Bacteria(100);unclassified(100);unclassified(100);unclassified(100);unclassified(100);unclassified(100);
Otu00982	178	Bacteria(100);"Bacteroidetes"(100);unclassified(95);unclassified(95);unclassified(95);unclassified(95);
Otu00983	178	Bacteria(100);"Actinobacteria"(100);Actinobacteria(100);Acidimicrobiales(100);unclassified(53);unclassified(53);
Otu00984	178	Bacteria(100);unclassified(100);unclassified(100);unclassified(100);unclassified(100);unclassified(100);
Otu00985	177	Bacteria(100);"Planctomycetes"(100);"Planctomycetacia"(100);Planctomycetales(100);Planctomycetaceae(100);Gemmata(81);
Otu00986	177	Bacteria(100);unclassified(98);unclassified(98);unclassified(98);unclassified(98);unclassified(98);
Otu00987	177	Bacteria(100);unclassified(81);unclassified(81);unclassified(81);unclassified(81);unclassified(81);
Otu00988	177	Bacteria(100);unclassified(69);unclassified(69);unclassified(69);unclassified(69);unclassified(69);
Otu00989	177	Bacteria(100);"Acidobacteria"(100);Acidobacteria_Gp4(100);Acidobacteria_Gp4_order_incertae_sedis(100);Acidobacteria_Gp4_family_incertae_sedis(100);Gp4(100);
Otu00990	177	Bacteria(100);"Proteobacteria"(100);Deltaproteobacteria(100);Myxococcales(100);unclassified(100);unclassified(100);
Otu00991	176	Bacteria(100);"Proteobacteria"(100);Deltaproteobacteria(100);unclassified(100);unclassified(100);unclassified(100);
Otu00992	176	Bacteria(100);"Bacteroidetes"(100);"Sphingobacteria"(100);"Sphingobacteriales"(100);Sphingobacteriaceae(100);Sphingobacterium(100);
Otu00993	176	Bacteria(100);"Bacteroidetes"(100);unclassified(100);unclassified(100);unclassified(100);unclassified(100);
Otu00994	176	Bacteria(100);"Proteobacteria"(100);Alphaproteobacteria(100);unclassified(91);unclassified(91);unclassified(91);
Otu00995	175	Bacteria(100);"Proteobacteria"(100);Alphaproteobacteria(100);unclassified(62);unclassified(62);unclassified(62);
Otu00996	175	Bacteria(100);unclassified(100);unclassified(100);unclassified(100);unclassified(100);unclassified(100);
Otu00997	174	Bacteria(100);"Verrucomicrobia"(100);Subdivision3(100);Subdivision3_order_incertae_sedis(100);Subdivision3_family_incertae_sedis(100);3_genus_incertae_sedis(100);
Otu00998	174	Bacteria(100);"Acidobacteria"(100);Acidobacteria_Gp1(100);Acidobacteria_Gp1_order_incertae_sedis(100);Acidobacteria_Gp1_family_incertae_sedis(100);Gp1(100);
Otu00999	174	Bacteria(100);unclassified(100);unclassified(100);unclassified(100);unclassified(100);unclassified(100);
Otu01000	174	Bacteria(100);"Armatimonadetes"(100);Chthonomonadetes(100);Chthonomonadales(100);Chthonomonadaceae(100);Chthonomonas_Armatimonadetes_gp3(100);
Otu01001	173	Bacteria(100);"Proteobacteria"(98);unclassified(98);unclassified(98);unclassified(98);unclassified(98);
Otu01002	173	Bacteria(100);"Bacteroidetes"(100);"Bacteroidetes"_incertae_sedis_class_incertae_sedis(100);"Bacteroidetes"_incertae_sedis_order_incertae_sedis(100);"Bacteroidetes"_incertae_sedis_family_incertae_sedis(100);Ohtaekwangia(100);
Otu01003	173	Bacteria(100);unclassified(80);unclassified(80);unclassified(80);unclassified(80);unclassified(80);
Otu01004	173	Bacteria(100);unclassified(100);unclassified(100);unclassified(100);unclassified(100);unclassified(100);
Otu01005	172	Bacteria(100);"Bacteroidetes"(100);"Sphingobacteria"(100);"Sphingobacteriales"(100);Chitinophagaceae(100);unclassified(100);
Otu01006	172	Bacteria(100);"Bacteroidetes"(100);"Bacteroidetes"_incertae_sedis_class_incertae_sedis(100);"Bacteroidetes"_incertae_sedis_order_incertae_sedis(100);"Bacteroidetes"_incertae_sedis_family_incertae_sedis(100);Ohtaekwangia(100);
Otu01007	172	Bacteria(100);unclassified(100);unclassified(100);unclassified(100);unclassified(100);unclassified(100);
Otu01008	172	Bacteria(100);unclassified(100);unclassified(100);unclassified(100);unclassified(100);unclassified(100);
Otu01009	172	Bacteria(100);"Proteobacteria"(100);Deltaproteobacteria(100);Myxococcales(100);unclassified(96);unclassified(96);
Otu01010	172	Bacteria(100);"Acidobacteria"(100);Acidobacteria_Gp25(100);Acidobacteria_Gp25_order_incertae_sedis(100);Acidobacteria_Gp25_family_incertae_sedis(100);Gp25(100);
Otu01011	171	Bacteria(100);"Bacteroidetes"(100);unclassified(100);unclassified(100);unclassified(100);unclassified(100);
Otu01012	171	Bacteria(100);Firmicutes(100);Clostridia(75);unclassified(75);unclassified(75);unclassified(75);
Otu01013	171	Bacteria(100);"Planctomycetes"(100);"Planctomycetacia"(100);Planctomycetales(100);Planctomycetaceae(100);Planctomyces(100);
Otu01014	171	Bacteria(100);unclassified(100);unclassified(100);unclassified(100);unclassified(100);unclassified(100);
Otu01015	171	Bacteria(100);WS3(100);WS3_class_incertae_sedis(100);WS3_order_incertae_sedis(100);WS3_family_incertae_sedis(100);WS3_genus_incertae_sedis(100);
Otu01016	171	Bacteria(100);"Bacteroidetes"(100);"Sphingobacteria"(100);"Sphingobacteriales"(100);Chitinophagaceae(100);unclassified(67);
Otu01017	171	Bacteria(100);unclassified(100);unclassified(100);unclassified(100);unclassified(100);unclassified(100);
Otu01018	171	Bacteria(100);unclassified(94);unclassified(94);unclassified(94);unclassified(94);unclassified(94);
Otu01019	170	Bacteria(100);unclassified(100);unclassified(100);unclassified(100);unclassified(100);unclassified(100);
Otu01020	170	Bacteria(100);unclassified(100);unclassified(100);unclassified(100);unclassified(100);unclassified(100);
Otu01021	170	Bacteria(100);unclassified(100);unclassified(100);unclassified(100);unclassified(100);unclassified(100);
Otu01022	170	Bacteria(100);unclassified(91);unclassified(91);unclassified(91);unclassified(91);unclassified(91);
Otu01023	170	Bacteria(100);"Proteobacteria"(100);Alphaproteobacteria(100);Sphingomonadales(100);Sphingomonadaceae(100);Sphingomonas(100);
Otu01024	170	Bacteria(100);"Planctomycetes"(100);"Planctomycetacia"(100);Planctomycetales(100);Planctomycetaceae(100);unclassified(100);
Otu01025	170	Bacteria(100);"Acidobacteria"(100);Acidobacteria_Gp1(100);Acidobacteria_Gp1_order_incertae_sedis(100);Acidobacteria_Gp1_family_incertae_sedis(100);Gp1(100);
Otu01026	169	Bacteria(100);"Bacteroidetes"(100);unclassified(99);unclassified(99);unclassified(99);unclassified(99);
Otu01027	169	Bacteria(100);"Proteobacteria"(98);unclassified(98);unclassified(98);unclassified(98);unclassified(98);
Otu01028	169	Bacteria(100);Firmicutes(100);Clostridia(100);Clostridiales(100);Clostridiales_Incertae_Sedis_XI(100);Tissierella(100);
Otu01029	169	Bacteria(100);"Proteobacteria"(100);Alphaproteobacteria(100);Rhodospirillales(100);Rhodospirillaceae(100);unclassified(100);
Otu01030	168	Bacteria(100);"Bacteroidetes"(100);Flavobacteria(100);"Flavobacteriales"(100);Flavobacteriaceae(100);Flavobacterium(100);
Otu01031	168	Bacteria(100);unclassified(100);unclassified(100);unclassified(100);unclassified(100);unclassified(100);
Otu01032	168	Bacteria(100);"Actinobacteria"(99);Actinobacteria(99);unclassified(99);unclassified(99);unclassified(99);
Otu01033	168	Bacteria(100);Firmicutes(100);Bacilli(100);Bacillales(100);Paenibacillaceae_1(100);Paenibacillus(96);
Otu01034	167	Bacteria(100);unclassified(100);unclassified(100);unclassified(100);unclassified(100);unclassified(100);
Otu01035	167	Bacteria(100);Firmicutes(100);Clostridia(100);Clostridiales(100);Peptostreptococcaceae(100);Clostridium_XI(100);
Otu01036	167	Bacteria(100);"Verrucomicrobia"(100);Opitutae(100);Opitutales(100);Opitutaceae(100);Opitutus(100);
Otu01037	167	Bacteria(100);"Proteobacteria"(100);Deltaproteobacteria(100);Myxococcales(100);unclassified(100);unclassified(100);
Otu01038	167	Bacteria(100);unclassified(62);unclassified(62);unclassified(62);unclassified(62);unclassified(62);
Otu01039	167	Bacteria(100);"Acidobacteria"(100);Acidobacteria_Gp15(100);Acidobacteria_Gp15_order_incertae_sedis(100);Acidobacteria_Gp15_family_incertae_sedis(100);Gp15(100);
Otu01040	166	Bacteria(100);unclassified(100);unclassified(100);unclassified(100);unclassified(100);unclassified(100);
Otu01041	166	Bacteria(100);Firmicutes(100);Bacilli(100);Bacillales(100);Paenibacillaceae_1(100);Paenibacillus(100);
Otu01042	166	Bacteria(100);unclassified(96);unclassified(96);unclassified(96);unclassified(96);unclassified(96);
Otu01043	165	Bacteria(100);unclassified(100);unclassified(100);unclassified(100);unclassified(100);unclassified(100);
Otu01044	164	Bacteria(100);"Proteobacteria"(100);Alphaproteobacteria(100);Rhizobiales(100);unclassified(97);unclassified(97);
Otu01045	164	Bacteria(100);"Proteobacteria"(100);Alphaproteobacteria(100);Sphingomonadales(100);Sphingomonadaceae(100);Sphingobium(100);
Otu01046	164	Bacteria(100);"Bacteroidetes"(100);"Sphingobacteria"(100);"Sphingobacteriales"(100);unclassified(100);unclassified(100);
Otu01047	164	Bacteria(100);"Gemmatimonadetes"(100);Gemmatimonadetes(100);Gemmatimonadales(100);Gemmatimonadaceae(100);Gemmatimonas(100);
Otu01048	164	Bacteria(100);"Planctomycetes"(100);"Planctomycetacia"(100);Planctomycetales(100);Planctomycetaceae(100);Zavarzinella(96);
Otu01049	164	Bacteria(100);unclassified(100);unclassified(100);unclassified(100);unclassified(100);unclassified(100);
Otu01050	164	Bacteria(100);"Bacteroidetes"(100);unclassified(97);unclassified(97);unclassified(97);unclassified(97);
Otu01051	163	Bacteria(100);"Proteobacteria"(100);Betaproteobacteria(100);unclassified(100);unclassified(100);unclassified(100);
Otu01052	163	Bacteria(100);unclassified(100);unclassified(100);unclassified(100);unclassified(100);unclassified(100);
Otu01053	163	Bacteria(100);"Proteobacteria"(100);Betaproteobacteria(100);unclassified(95);unclassified(95);unclassified(95);
Otu01054	163	Bacteria(100);unclassified(100);unclassified(100);unclassified(100);unclassified(100);unclassified(100);
Otu01055	163	Bacteria(100);"Proteobacteria"(100);Alphaproteobacteria(100);Rhizobiales(100);Bradyrhizobiaceae(100);Rhodopseudomonas(62);
Otu01056	163	Bacteria(100);Firmicutes(100);Bacilli(100);Bacillales(100);Paenibacillaceae_1(55);Paenibacillus(54);
Otu01057	163	Bacteria(100);Firmicutes(100);Bacilli(100);Bacillales(100);Pasteuriaceae(100);Pasteuria(100);
Otu01058	162	Bacteria(100);"Proteobacteria"(100);Deltaproteobacteria(100);Desulfuromonadales(100);Desulfuromonadaceae(100);Desulfuromonas(99);
Otu01059	162	Bacteria(100);"Verrucomicrobia"(100);Subdivision3(100);Subdivision3_order_incertae_sedis(100);Subdivision3_family_incertae_sedis(100);3_genus_incertae_sedis(100);
Otu01060	162	Bacteria(100);"Bacteroidetes"(100);"Sphingobacteria"(100);"Sphingobacteriales"(100);Cytophagaceae(100);Cytophaga(100);
Otu01061	162	Bacteria(100);"Bacteroidetes"(100);"Sphingobacteria"(100);"Sphingobacteriales"(100);Chitinophagaceae(100);unclassified(100);
Otu01062	161	Bacteria(100);"Actinobacteria"(100);Actinobacteria(100);Actinomycetales(100);Micromonosporaceae(100);Dactylosporangium(84);
Otu01063	161	Bacteria(100);"Bacteroidetes"(100);"Sphingobacteria"(100);"Sphingobacteriales"(100);Chitinophagaceae(100);unclassified(100);
Otu01064	161	Bacteria(100);"Bacteroidetes"(100);"Sphingobacteria"(100);"Sphingobacteriales"(100);Chitinophagaceae(100);unclassified(93);
Otu01065	161	Bacteria(100);"Proteobacteria"(100);Gammaproteobacteria(100);unclassified(100);unclassified(100);unclassified(100);
Otu01066	161	Bacteria(100);"Proteobacteria"(100);Deltaproteobacteria(100);Myxococcales(100);Cystobacteraceae(100);unclassified(58);
Otu01067	160	Bacteria(100);unclassified(100);unclassified(100);unclassified(100);unclassified(100);unclassified(100);
Otu01068	160	Bacteria(100);"Proteobacteria"(100);Gammaproteobacteria(100);Aeromonadales(100);Aeromonadaceae(100);Aeromonas(100);
Otu01069	160	Bacteria(100);"Acidobacteria"(100);Acidobacteria_Gp10(99);Acidobacteria_Gp10_order_incertae_sedis(99);Acidobacteria_Gp10_family_incertae_sedis(99);Gp10(99);
Otu01070	160	Bacteria(100);"Planctomycetes"(100);"Planctomycetacia"(100);Planctomycetales(100);Planctomycetaceae(100);Planctomyces(100);
Otu01071	159	Bacteria(100);"Proteobacteria"(100);Gammaproteobacteria(100);Alteromonadales(70);Alteromonadaceae(70);Haliea(70);
Otu01072	159	Bacteria(100);"Proteobacteria"(100);Deltaproteobacteria(99);unclassified(99);unclassified(99);unclassified(99);
Otu01073	159	Bacteria(100);"Actinobacteria"(100);Actinobacteria(100);Actinomycetales(100);Nocardiaceae(100);Rhodococcus(99);
Otu01074	159	Bacteria(100);"Bacteroidetes"(100);Flavobacteria(100);"Flavobacteriales"(100);Flavobacteriaceae(100);Flavobacterium(100);
Otu01075	159	Bacteria(100);"Actinobacteria"(65);Actinobacteria(65);unclassified(65);unclassified(65);unclassified(65);
Otu01076	159	Bacteria(100);"Acidobacteria"(100);Acidobacteria_Gp4(100);Acidobacteria_Gp4_order_incertae_sedis(100);Acidobacteria_Gp4_family_incertae_sedis(100);Gp4(100);
Otu01077	159	Bacteria(100);unclassified(100);unclassified(100);unclassified(100);unclassified(100);unclassified(100);
Otu01078	159	Bacteria(100);"Bacteroidetes"(100);Flavobacteria(100);"Flavobacteriales"(100);Flavobacteriaceae(100);Flavobacterium(100);
Otu01079	159	Bacteria(100);unclassified(100);unclassified(100);unclassified(100);unclassified(100);unclassified(100);
Otu01080	158	Bacteria(100);"Proteobacteria"(100);Betaproteobacteria(100);Rhodocyclales(100);Rhodocyclaceae(100);unclassified(66);
Otu01081	158	Bacteria(100);unclassified(100);unclassified(100);unclassified(100);unclassified(100);unclassified(100);
Otu01082	158	Bacteria(100);"Actinobacteria"(100);Actinobacteria(100);Actinomycetales(100);Corynebacterineae_incertae_sedis(99);Tomitella(99);
Otu01083	158	Bacteria(100);"Acidobacteria"(100);Acidobacteria_Gp3(100);Acidobacteria_Gp3_order_incertae_sedis(100);Acidobacteria_Gp3_family_incertae_sedis(100);Gp3(100);
Otu01084	158	Bacteria(100);"Proteobacteria"(100);Betaproteobacteria(100);Burkholderiales(100);unclassified(63);unclassified(63);
Otu01085	158	Bacteria(100);"Bacteroidetes"(100);Flavobacteria(100);"Flavobacteriales"(100);Cryomorphaceae(100);unclassified(100);
Otu01086	157	Bacteria(100);unclassified(100);unclassified(100);unclassified(100);unclassified(100);unclassified(100);
Otu01087	156	Bacteria(100);"Planctomycetes"(100);"Planctomycetacia"(100);Planctomycetales(100);Planctomycetaceae(100);Gemmata(100);
Otu01088	156	Bacteria(100);"Planctomycetes"(100);"Planctomycetacia"(100);Planctomycetales(100);Planctomycetaceae(100);Gemmata(93);
Otu01089	155	Bacteria(100);"Chloroflexi"(100);Thermomicrobia(100);Sphaerobacterales(100);Sphaerobacteraceae(100);Sphaerobacter(100);
Otu01090	155	Bacteria(100);"Acidobacteria"(95);Acidobacteria_Gp15(95);Acidobacteria_Gp15_order_incertae_sedis(95);Acidobacteria_Gp15_family_incertae_sedis(95);Gp15(95);
Otu01091	155	Bacteria(100);"Acidobacteria"(100);Acidobacteria_Gp4(100);Acidobacteria_Gp4_order_incertae_sedis(100);Acidobacteria_Gp4_family_incertae_sedis(100);Gp4(100);
Otu01092	155	Bacteria(100);unclassified(100);unclassified(100);unclassified(100);unclassified(100);unclassified(100);
Otu01093	155	Bacteria(100);"Proteobacteria"(100);Alphaproteobacteria(100);Rhodospirillales(100);Acetobacteraceae(79);unclassified(79);
Otu01094	155	Bacteria(100);unclassified(100);unclassified(100);unclassified(100);unclassified(100);unclassified(100);
Otu01095	154	Bacteria(100);"Proteobacteria"(96);unclassified(96);unclassified(96);unclassified(96);unclassified(96);
Otu01096	154	Bacteria(100);"Proteobacteria"(100);Deltaproteobacteria(100);Myxococcales(100);unclassified(100);unclassified(100);
Otu01097	154	Bacteria(100);"Verrucomicrobia"(100);Opitutae(100);Opitutales(100);Opitutaceae(100);Opitutus(100);
Otu01098	154	Bacteria(100);unclassified(100);unclassified(100);unclassified(100);unclassified(100);unclassified(100);
Otu01099	153	Bacteria(100);unclassified(100);unclassified(100);unclassified(100);unclassified(100);unclassified(100);
Otu01100	153	Bacteria(100);"Armatimonadetes"(100);Armatimonadetes_gp5_class_incertae_sedis(100);Armatimonadetes_gp5_order_incetae_sedis(100);Armatimonadetes_gp5_family_incetae_sedis(100);Armatimonadetes_gp5(100);
Otu01101	153	Bacteria(100);"Proteobacteria"(100);Alphaproteobacteria(100);Sphingomonadales(100);Erythrobacteraceae(100);Porphyrobacter(100);
Otu01102	152	Bacteria(100);"Proteobacteria"(100);Alphaproteobacteria(100);Alphaproteobacteria_order_incertae_sedis(100);Alphaproteobacteria_family_incertae_sedis(100);Geminicoccus(100);
Otu01103	152	Bacteria(100);"Proteobacteria"(100);Alphaproteobacteria(100);Rhodospirillales(100);Acetobacteraceae(100);Roseomonas(100);
Otu01104	152	Bacteria(100);"Actinobacteria"(100);Actinobacteria(100);unclassified(100);unclassified(100);unclassified(100);
Otu01105	152	Bacteria(100);"Acidobacteria"(100);Acidobacteria_Gp3(100);Acidobacteria_Gp3_order_incertae_sedis(100);Acidobacteria_Gp3_family_incertae_sedis(100);Gp3(100);
Otu01106	152	Bacteria(100);"Proteobacteria"(100);Gammaproteobacteria(100);Xanthomonadales(100);Sinobacteraceae(100);Alkanibacter(100);
Otu01107	152	Bacteria(100);unclassified(100);unclassified(100);unclassified(100);unclassified(100);unclassified(100);
Otu01108	152	Bacteria(100);"Proteobacteria"(100);Gammaproteobacteria(100);Alteromonadales(100);Alteromonadaceae(100);Haliea(100);
Otu01109	152	Bacteria(100);unclassified(100);unclassified(100);unclassified(100);unclassified(100);unclassified(100);
Otu01110	151	Bacteria(100);"Verrucomicrobia"(100);Subdivision3(100);Subdivision3_order_incertae_sedis(100);Subdivision3_family_incertae_sedis(100);3_genus_incertae_sedis(100);
Otu01111	151	Bacteria(100);unclassified(100);unclassified(100);unclassified(100);unclassified(100);unclassified(100);
Otu01112	151	Bacteria(100);unclassified(100);unclassified(100);unclassified(100);unclassified(100);unclassified(100);
Otu01113	151	Bacteria(100);unclassified(100);unclassified(100);unclassified(100);unclassified(100);unclassified(100);
Otu01114	151	Bacteria(100);"Actinobacteria"(95);Actinobacteria(95);unclassified(81);unclassified(81);unclassified(81);
Otu01115	151	Bacteria(100);"Verrucomicrobia"(100);Subdivision3(100);Subdivision3_order_incertae_sedis(100);Subdivision3_family_incertae_sedis(100);3_genus_incertae_sedis(100);
Otu01116	150	Bacteria(100);unclassified(100);unclassified(100);unclassified(100);unclassified(100);unclassified(100);
Otu01117	150	Bacteria(100);"Verrucomicrobia"(100);Subdivision3(100);Subdivision3_order_incertae_sedis(100);Subdivision3_family_incertae_sedis(100);3_genus_incertae_sedis(100);
Otu01118	150	Bacteria(100);"Chloroflexi"(68);Anaerolineae(68);Anaerolineales(68);Anaerolineaceae(68);unclassified(68);
Otu01119	150	Bacteria(100);unclassified(100);unclassified(100);unclassified(100);unclassified(100);unclassified(100);
Otu01120	150	Bacteria(100);"Bacteroidetes"(100);"Sphingobacteria"(100);"Sphingobacteriales"(100);Chitinophagaceae(100);unclassified(100);
Otu01121	150	Bacteria(100);"Proteobacteria"(75);unclassified(75);unclassified(75);unclassified(75);unclassified(75);
Otu01122	150	Bacteria(100);unclassified(100);unclassified(100);unclassified(100);unclassified(100);unclassified(100);
Otu01123	150	Bacteria(100);Firmicutes(100);Bacilli(100);Bacillales(100);Alicyclobacillaceae(100);Tumebacillus(100);
Otu01124	150	Bacteria(100);"Proteobacteria"(100);Alphaproteobacteria(100);Rhodospirillales(100);unclassified(96);unclassified(96);
Otu01125	149	Bacteria(100);unclassified(100);unclassified(100);unclassified(100);unclassified(100);unclassified(100);
Otu01126	149	Bacteria(100);"Chloroflexi"(100);Caldilineae(100);Caldilineales(100);Caldilineaceae(100);Caldilinea(100);
Otu01127	149	Bacteria(100);"Acidobacteria"(100);Acidobacteria_Gp16(100);Acidobacteria_Gp16_order_incertae_sedis(100);Acidobacteria_Gp16_family_incertae_sedis(100);Gp16(100);
Otu01128	149	Bacteria(100);unclassified(100);unclassified(100);unclassified(100);unclassified(100);unclassified(100);
Otu01129	149	Bacteria(100);unclassified(100);unclassified(100);unclassified(100);unclassified(100);unclassified(100);
Otu01130	149	Bacteria(100);"Acidobacteria"(100);Acidobacteria_Gp7(100);Acidobacteria_Gp7_order_incertae_sedis(100);Acidobacteria_Gp7_family_incertae_sedis(100);Gp7(100);
Otu01131	149	Bacteria(100);"Proteobacteria"(100);Deltaproteobacteria(100);Myxococcales(96);Polyangiaceae(52);unclassified(52);
Otu01132	148	Bacteria(100);"Proteobacteria"(100);Deltaproteobacteria(100);Myxococcales(100);unclassified(100);unclassified(100);
Otu01133	147	Bacteria(100);"Actinobacteria"(100);Actinobacteria(100);Solirubrobacterales(100);unclassified(99);unclassified(99);
Otu01134	147	Bacteria(100);"Acidobacteria"(100);Acidobacteria_Gp3(100);Acidobacteria_Gp3_order_incertae_sedis(100);Acidobacteria_Gp3_family_incertae_sedis(100);Gp3(100);
Otu01135	147	Bacteria(100);"Proteobacteria"(100);Deltaproteobacteria(100);Myxococcales(100);Polyangiaceae(65);unclassified(65);
Otu01136	147	Bacteria(100);"Acidobacteria"(100);Acidobacteria_Gp17(100);Acidobacteria_Gp17_order_incertae_sedis(100);Acidobacteria_Gp17_family_incertae_sedis(100);Gp17(100);
Otu01137	147	Bacteria(100);"Bacteroidetes"(100);"Sphingobacteria"(100);"Sphingobacteriales"(100);Chitinophagaceae(100);unclassified(100);
Otu01138	146	Bacteria(100);unclassified(100);unclassified(100);unclassified(100);unclassified(100);unclassified(100);
Otu01139	146	Bacteria(100);"Spirochaetes"(100);Spirochaetes(100);Spirochaetales(100);Leptospiraceae(100);Turneriella(100);
Otu01140	146	Bacteria(100);"Planctomycetes"(100);"Planctomycetacia"(100);Planctomycetales(100);Planctomycetaceae(100);unclassified(79);
Otu01141	146	Bacteria(100);"Acidobacteria"(100);Acidobacteria_Gp6(100);Acidobacteria_Gp6_order_incertae_sedis(100);Acidobacteria_Gp6_family_incertae_sedis(100);Gp6(100);
Otu01142	146	Bacteria(100);Firmicutes(100);Clostridia(100);Clostridiales(100);Peptostreptococcaceae(100);Proteocatella(100);
Otu01143	146	Bacteria(100);"Verrucomicrobia"(100);Spartobacteria(100);Spartobacteria_order_incertae_sedis(100);Spartobacteria_family_incertae_sedis(100);Spartobacteria_genera_incertae_sedis(100);
Otu01144	146	Bacteria(100);"Proteobacteria"(100);Alphaproteobacteria(100);Rhizobiales(100);Methylobacteriaceae(100);Microvirga(100);
Otu01145	146	Bacteria(100);"Proteobacteria"(100);Betaproteobacteria(100);unclassified(98);unclassified(98);unclassified(98);
Otu01146	145	Bacteria(100);"Proteobacteria"(100);Deltaproteobacteria(100);Myxococcales(100);unclassified(95);unclassified(95);
Otu01147	145	Bacteria(100);"Bacteroidetes"(100);Flavobacteria(100);"Flavobacteriales"(100);Flavobacteriaceae(100);Myroides(100);
Otu01148	145	Bacteria(100);"Proteobacteria"(100);Gammaproteobacteria(100);Pseudomonadales(100);Pseudomonadaceae(100);Pseudomonas(100);
Otu01149	145	Bacteria(100);Firmicutes(100);Bacilli(100);Bacillales(100);Alicyclobacillaceae(100);Tumebacillus(100);
Otu01150	145	Bacteria(100);"Proteobacteria"(100);Alphaproteobacteria(100);Rhizobiales(100);unclassified(100);unclassified(100);
Otu01151	145	Bacteria(100);BRC1(100);BRC1_class_incertae_sedis(100);BRC1_order_incertae_sedis(100);BRC1_family_incertae_sedis(100);BRC1_genera_incertae_sedis(100);
Otu01152	145	Bacteria(100);"Bacteroidetes"(100);"Sphingobacteria"(100);"Sphingobacteriales"(100);Chitinophagaceae(100);Ferruginibacter(100);
Otu01153	144	Bacteria(100);"Proteobacteria"(100);Gammaproteobacteria(100);Pseudomonadales(100);Pseudomonadaceae(100);Cellvibrio(100);
Otu01154	144	Bacteria(100);unclassified(99);unclassified(99);unclassified(99);unclassified(99);unclassified(99);
Otu01155	144	Bacteria(100);unclassified(55);unclassified(55);unclassified(55);unclassified(55);unclassified(55);
Otu01156	144	Bacteria(100);"Proteobacteria"(75);unclassified(75);unclassified(75);unclassified(75);unclassified(75);
Otu01157	144	Bacteria(100);"Planctomycetes"(100);"Planctomycetacia"(100);Planctomycetales(100);Planctomycetaceae(100);Zavarzinella(100);
Otu01158	144	Bacteria(100);"Planctomycetes"(100);"Planctomycetacia"(100);Planctomycetales(100);Planctomycetaceae(100);unclassified(100);
Otu01159	144	Bacteria(100);unclassified(100);unclassified(100);unclassified(100);unclassified(100);unclassified(100);
Otu01160	143	Bacteria(100);"Actinobacteria"(100);Actinobacteria(100);Actinomycetales(100);unclassified(86);unclassified(86);
Otu01161	143	Bacteria(100);unclassified(100);unclassified(100);unclassified(100);unclassified(100);unclassified(100);
Otu01162	143	Bacteria(100);"Bacteroidetes"(100);"Sphingobacteria"(100);"Sphingobacteriales"(100);"Flammeovirgaceae"(73);Cesiribacter(72);
Otu01163	143	Bacteria(100);"Planctomycetes"(100);"Planctomycetacia"(100);Planctomycetales(100);Planctomycetaceae(100);unclassified(100);
Otu01164	143	Bacteria(100);"Planctomycetes"(100);"Planctomycetacia"(100);Planctomycetales(100);Planctomycetaceae(100);Singulisphaera(100);
Otu01165	143	Bacteria(100);"Acidobacteria"(100);Acidobacteria_Gp5(100);Acidobacteria_Gp5_order_incertae_sedis(100);Acidobacteria_Gp5_family_incertae_sedis(100);Gp5(100);
Otu01166	143	Bacteria(100);"Planctomycetes"(100);"Planctomycetacia"(100);Planctomycetales(100);Planctomycetaceae(100);Singulisphaera(100);
Otu01167	143	Bacteria(100);unclassified(100);unclassified(100);unclassified(100);unclassified(100);unclassified(100);
Otu01168	143	Bacteria(100);unclassified(100);unclassified(100);unclassified(100);unclassified(100);unclassified(100);
Otu01169	143	Bacteria(100);unclassified(100);unclassified(100);unclassified(100);unclassified(100);unclassified(100);
Otu01170	143	Bacteria(100);"Actinobacteria"(100);Actinobacteria(100);Actinomycetales(100);unclassified(95);unclassified(95);
Otu01171	143	Bacteria(100);"Actinobacteria"(100);Actinobacteria(100);Actinomycetales(100);Nocardiaceae(100);Rhodococcus(100);
Otu01172	142	Bacteria(100);"Acidobacteria"(99);unclassified(98);unclassified(98);unclassified(98);unclassified(98);
Otu01173	142	Bacteria(100);"Chlamydiae"(75);Chlamydiae(75);Chlamydiales(75);unclassified(75);unclassified(75);
Otu01174	142	Bacteria(100);unclassified(100);unclassified(100);unclassified(100);unclassified(100);unclassified(100);
Otu01175	142	Bacteria(100);"Planctomycetes"(100);"Planctomycetacia"(100);Planctomycetales(100);Planctomycetaceae(100);unclassified(99);
Otu01176	142	Bacteria(100);"Planctomycetes"(100);"Planctomycetacia"(100);Planctomycetales(100);Planctomycetaceae(100);unclassified(86);
Otu01177	142	Bacteria(100);"Actinobacteria"(100);Actinobacteria(100);Acidimicrobiales(100);unclassified(100);unclassified(100);
Otu01178	141	Bacteria(100);"Bacteroidetes"(100);unclassified(100);unclassified(100);unclassified(100);unclassified(100);
Otu01179	141	Bacteria(100);unclassified(100);unclassified(100);unclassified(100);unclassified(100);unclassified(100);
Otu01180	140	Bacteria(100);"Bacteroidetes"(100);Flavobacteria(100);"Flavobacteriales"(100);Cryomorphaceae(100);Fluviicola(100);
Otu01181	140	Bacteria(100);"Planctomycetes"(100);"Planctomycetacia"(100);Planctomycetales(100);Planctomycetaceae(100);Zavarzinella(98);
Otu01182	140	Bacteria(100);"Proteobacteria"(100);unclassified(100);unclassified(100);unclassified(100);unclassified(100);
Otu01183	140	Bacteria(100);"Planctomycetes"(100);"Planctomycetacia"(100);Planctomycetales(100);Planctomycetaceae(100);Singulisphaera(100);
Otu01184	140	Bacteria(100);"Acidobacteria"(100);Acidobacteria_Gp16(100);Acidobacteria_Gp16_order_incertae_sedis(100);Acidobacteria_Gp16_family_incertae_sedis(100);Gp16(100);
Otu01185	140	Bacteria(100);unclassified(100);unclassified(100);unclassified(100);unclassified(100);unclassified(100);
Otu01186	140	Bacteria(100);unclassified(100);unclassified(100);unclassified(100);unclassified(100);unclassified(100);
Otu01187	140	Bacteria(100);"Bacteroidetes"(100);"Sphingobacteria"(100);"Sphingobacteriales"(100);Chitinophagaceae(100);unclassified(100);
Otu01188	140	Bacteria(100);"Planctomycetes"(100);"Planctomycetacia"(100);Planctomycetales(100);Planctomycetaceae(100);unclassified(100);
Otu01190	139	Bacteria(100);"Proteobacteria"(100);Deltaproteobacteria(100);Myxococcales(100);Polyangiaceae(93);unclassified(90);
Otu01191	139	Bacteria(100);"Acidobacteria"(100);Acidobacteria_Gp4(100);Acidobacteria_Gp4_order_incertae_sedis(100);Acidobacteria_Gp4_family_incertae_sedis(100);Gp4(100);
Otu01192	139	Bacteria(100);"Proteobacteria"(100);Alphaproteobacteria(100);unclassified(100);unclassified(100);unclassified(100);
Otu01193	139	Bacteria(100);"Proteobacteria"(100);Gammaproteobacteria(100);unclassified(100);unclassified(100);unclassified(100);
Otu01194	139	Bacteria(100);"Acidobacteria"(100);Acidobacteria_Gp3(100);Acidobacteria_Gp3_order_incertae_sedis(100);Acidobacteria_Gp3_family_incertae_sedis(100);Gp3(100);
Otu01195	138	Bacteria(100);"Planctomycetes"(100);"Planctomycetacia"(100);Planctomycetales(100);Planctomycetaceae(100);unclassified(100);
Otu01196	138	Bacteria(100);unclassified(99);unclassified(99);unclassified(99);unclassified(99);unclassified(99);
Otu01197	138	Bacteria(100);"Proteobacteria"(78);unclassified(78);unclassified(78);unclassified(78);unclassified(78);
Otu01198	138	Bacteria(100);"Proteobacteria"(100);Betaproteobacteria(100);unclassified(100);unclassified(100);unclassified(100);
Otu01199	138	Bacteria(100);"Proteobacteria"(100);Deltaproteobacteria(100);unclassified(60);unclassified(60);unclassified(60);
Otu01200	137	Bacteria(100);Firmicutes(100);Clostridia(100);Clostridiales(100);unclassified(100);unclassified(100);
Otu01201	137	Bacteria(100);"Bacteroidetes"(100);"Sphingobacteria"(100);"Sphingobacteriales"(100);Sphingobacteriaceae(100);Pedobacter(100);
Otu01202	137	Bacteria(100);"Proteobacteria"(100);Alphaproteobacteria(100);Rhodospirillales(100);unclassified(100);unclassified(100);
Otu01203	137	Bacteria(100);"Proteobacteria"(100);Deltaproteobacteria(100);Myxococcales(100);unclassified(99);unclassified(99);
Otu01204	137	Bacteria(100);"Verrucomicrobia"(100);Subdivision3(100);Subdivision3_order_incertae_sedis(100);Subdivision3_family_incertae_sedis(100);3_genus_incertae_sedis(100);
Otu01205	136	Bacteria(100);"Planctomycetes"(100);"Planctomycetacia"(100);Planctomycetales(100);Planctomycetaceae(100);unclassified(100);
Otu01206	136	Bacteria(100);"Bacteroidetes"(100);unclassified(100);unclassified(100);unclassified(100);unclassified(100);
Otu01207	136	Bacteria(100);unclassified(100);unclassified(100);unclassified(100);unclassified(100);unclassified(100);
Otu01208	136	Bacteria(100);unclassified(69);unclassified(69);unclassified(69);unclassified(69);unclassified(69);
Otu01209	136	Bacteria(100);"Proteobacteria"(100);Alphaproteobacteria(100);Rhizobiales(100);Brucellaceae(98);unclassified(73);
Otu01210	136	Bacteria(100);"Bacteroidetes"(100);unclassified(100);unclassified(100);unclassified(100);unclassified(100);
Otu01211	136	Bacteria(100);"Bacteroidetes"(100);Flavobacteria(100);"Flavobacteriales"(100);Flavobacteriaceae(100);Flavobacterium(100);
Otu01212	136	Bacteria(100);"Proteobacteria"(100);Deltaproteobacteria(100);Myxococcales(98);unclassified(98);unclassified(98);
Otu01213	136	Bacteria(100);"Proteobacteria"(100);Betaproteobacteria(100);unclassified(100);unclassified(100);unclassified(100);
Otu01214	136	Bacteria(100);unclassified(100);unclassified(100);unclassified(100);unclassified(100);unclassified(100);
Otu01215	135	Bacteria(100);"Proteobacteria"(100);Deltaproteobacteria(100);unclassified(80);unclassified(80);unclassified(80);
Otu01216	135	Bacteria(100);"Acidobacteria"(100);Acidobacteria_Gp3(100);Acidobacteria_Gp3_order_incertae_sedis(100);Acidobacteria_Gp3_family_incertae_sedis(100);Gp3(100);
Otu01217	135	Bacteria(100);"Bacteroidetes"(100);"Sphingobacteria"(100);"Sphingobacteriales"(100);Cytophagaceae(99);unclassified(51);
Otu01218	135	Bacteria(100);unclassified(100);unclassified(100);unclassified(100);unclassified(100);unclassified(100);
Otu01219	135	Bacteria(100);"Proteobacteria"(100);Gammaproteobacteria(100);Methylococcales(100);Methylococcaceae(100);Methylobacter(100);
Otu01220	135	Bacteria(100);unclassified(100);unclassified(100);unclassified(100);unclassified(100);unclassified(100);
Otu01221	135	Bacteria(100);"Proteobacteria"(100);Alphaproteobacteria(100);Rhodospirillales(100);unclassified(78);unclassified(78);
Otu01222	135	Bacteria(100);"Bacteroidetes"(100);unclassified(66);unclassified(66);unclassified(66);unclassified(66);
Otu01223	135	Bacteria(100);"Proteobacteria"(100);Alphaproteobacteria(100);Rhodospirillales(100);Acetobacteraceae(100);unclassified(100);
Otu01224	134	Bacteria(100);"Proteobacteria"(100);Deltaproteobacteria(100);unclassified(100);unclassified(100);unclassified(100);
Otu01225	134	Bacteria(100);unclassified(100);unclassified(100);unclassified(100);unclassified(100);unclassified(100);
Otu01226	133	Bacteria(100);"Actinobacteria"(100);Actinobacteria(100);Actinomycetales(100);Micromonosporaceae(97);Micromonospora(71);
Otu01227	133	Bacteria(100);unclassified(100);unclassified(100);unclassified(100);unclassified(100);unclassified(100);
Otu01228	133	Bacteria(100);"Planctomycetes"(100);"Planctomycetacia"(100);Planctomycetales(100);Planctomycetaceae(100);Planctomyces(100);
Otu01229	133	Bacteria(100);"Proteobacteria"(100);Alphaproteobacteria(100);Sphingomonadales(100);Sphingomonadaceae(100);Novosphingobium(97);
Otu01230	133	Bacteria(100);unclassified(98);unclassified(98);unclassified(98);unclassified(98);unclassified(98);
Otu01231	133	Bacteria(100);"Verrucomicrobia"(100);Subdivision3(100);Subdivision3_order_incertae_sedis(100);Subdivision3_family_incertae_sedis(100);3_genus_incertae_sedis(100);
Otu01232	133	Bacteria(100);"Proteobacteria"(100);Alphaproteobacteria(100);Rhizobiales(100);unclassified(100);unclassified(100);
Otu01233	133	Bacteria(100);"Actinobacteria"(100);Actinobacteria(100);Solirubrobacterales(100);Conexibacteraceae(100);Conexibacter(100);
Otu01234	133	Bacteria(100);"Verrucomicrobia"(100);Subdivision3(100);Subdivision3_order_incertae_sedis(100);Subdivision3_family_incertae_sedis(100);3_genus_incertae_sedis(100);
Otu01235	132	Bacteria(100);unclassified(92);unclassified(92);unclassified(92);unclassified(92);unclassified(92);
Otu01236	132	Bacteria(100);"Bacteroidetes"(100);unclassified(100);unclassified(100);unclassified(100);unclassified(100);
Otu01237	132	Bacteria(100);"Proteobacteria"(100);Gammaproteobacteria(100);unclassified(100);unclassified(100);unclassified(100);
Otu01238	132	Bacteria(100);"Planctomycetes"(100);"Planctomycetacia"(100);Planctomycetales(100);Planctomycetaceae(100);unclassified(97);
Otu01239	132	Bacteria(100);"Actinobacteria"(100);Actinobacteria(100);Actinomycetales(100);Micromonosporaceae(96);unclassified(96);
Otu01240	132	Bacteria(100);unclassified(100);unclassified(100);unclassified(100);unclassified(100);unclassified(100);
Otu01241	132	Bacteria(100);unclassified(100);unclassified(100);unclassified(100);unclassified(100);unclassified(100);
Otu01242	131	Bacteria(100);WS3(100);WS3_class_incertae_sedis(100);WS3_order_incertae_sedis(100);WS3_family_incertae_sedis(100);WS3_genus_incertae_sedis(100);
Otu01243	131	Bacteria(100);"Proteobacteria"(100);Alphaproteobacteria(100);Rhizobiales(100);unclassified(97);unclassified(97);
Otu01244	131	Bacteria(100);unclassified(100);unclassified(100);unclassified(100);unclassified(100);unclassified(100);
Otu01245	131	Bacteria(100);"Acidobacteria"(100);Acidobacteria_Gp4(100);Acidobacteria_Gp4_order_incertae_sedis(100);Acidobacteria_Gp4_family_incertae_sedis(100);Gp4(100);
Otu01246	130	Bacteria(100);"Proteobacteria"(100);Deltaproteobacteria(100);Myxococcales(100);unclassified(100);unclassified(100);
Otu01247	130	Bacteria(100);unclassified(100);unclassified(100);unclassified(100);unclassified(100);unclassified(100);
Otu01248	130	Bacteria(100);"Bacteroidetes"(100);"Sphingobacteria"(100);"Sphingobacteriales"(100);Chitinophagaceae(100);unclassified(100);
Otu01249	130	Bacteria(100);"Verrucomicrobia"(100);Subdivision3(100);Subdivision3_order_incertae_sedis(100);Subdivision3_family_incertae_sedis(100);3_genus_incertae_sedis(100);
Otu01250	129	Bacteria(100);"Proteobacteria"(100);Alphaproteobacteria(100);Rhizobiales(100);unclassified(99);unclassified(99);
Otu01251	129	Bacteria(100);"Proteobacteria"(100);Alphaproteobacteria(100);Caulobacterales(100);Caulobacteraceae(100);Caulobacter(74);
Otu01252	129	Bacteria(100);"Verrucomicrobia"(100);Spartobacteria(100);Spartobacteria_order_incertae_sedis(100);Spartobacteria_family_incertae_sedis(100);Spartobacteria_genera_incertae_sedis(100);
Otu01253	129	Bacteria(100);unclassified(100);unclassified(100);unclassified(100);unclassified(100);unclassified(100);
Otu01254	129	Bacteria(100);Firmicutes(100);Clostridia(100);Clostridiales(100);Clostridiaceae_1(100);Clostridium_sensu_stricto(100);
Otu01255	129	Bacteria(100);"Proteobacteria"(100);Alphaproteobacteria(100);unclassified(100);unclassified(100);unclassified(100);
Otu01257	129	Bacteria(100);unclassified(100);unclassified(100);unclassified(100);unclassified(100);unclassified(100);
Otu01258	128	Bacteria(100);"Proteobacteria"(100);Betaproteobacteria(100);unclassified(100);unclassified(100);unclassified(100);
Otu01259	128	Bacteria(100);unclassified(62);unclassified(62);unclassified(62);unclassified(62);unclassified(62);
Otu01260	128	Bacteria(100);"Proteobacteria"(75);unclassified(100);unclassified(100);unclassified(100);unclassified(100);
Otu01261	128	Bacteria(100);"Proteobacteria"(100);Alphaproteobacteria(100);Rhodospirillales(97);Rhodospirillaceae(93);unclassified(93);
Otu01262	128	Bacteria(100);"Bacteroidetes"(100);"Sphingobacteria"(100);"Sphingobacteriales"(100);unclassified(69);unclassified(69);
Otu01263	128	Bacteria(100);"Bacteroidetes"(100);"Sphingobacteria"(100);"Sphingobacteriales"(100);Sphingobacteriaceae(100);unclassified(100);
Otu01264	128	Bacteria(100);"Bacteroidetes"(100);Flavobacteria(100);"Flavobacteriales"(100);Flavobacteriaceae(100);Flavobacterium(100);
Otu01265	128	Bacteria(100);"Planctomycetes"(100);"Planctomycetacia"(100);Planctomycetales(100);Planctomycetaceae(100);Planctomyces(100);
Otu01266	127	Bacteria(100);"Verrucomicrobia"(100);Spartobacteria(100);Spartobacteria_order_incertae_sedis(100);Spartobacteria_family_incertae_sedis(100);Spartobacteria_genera_incertae_sedis(100);
Otu01267	127	Bacteria(100);"Actinobacteria"(100);Actinobacteria(100);Solirubrobacterales(100);Conexibacteraceae(80);Conexibacter(80);
Otu01268	127	Bacteria(100);"Acidobacteria"(100);Acidobacteria_Gp10(100);Acidobacteria_Gp10_order_incertae_sedis(100);Acidobacteria_Gp10_family_incertae_sedis(100);Gp10(100);
Otu01269	127	Bacteria(100);"Proteobacteria"(100);Gammaproteobacteria(100);Pseudomonadales(100);Moraxellaceae(100);Acinetobacter(100);
Otu01270	127	Bacteria(100);"Proteobacteria"(100);Gammaproteobacteria(100);Aeromonadales(100);Aeromonadaceae(100);Oceanisphaera(100);
Otu01271	127	Bacteria(100);"Proteobacteria"(100);Alphaproteobacteria(100);Rhodobacterales(100);Rhodobacteraceae(100);unclassified(100);
Otu01272	127	Bacteria(100);unclassified(100);unclassified(100);unclassified(100);unclassified(100);unclassified(100);
Otu01273	127	Bacteria(100);unclassified(100);unclassified(100);unclassified(100);unclassified(100);unclassified(100);
Otu01274	127	Bacteria(100);"Proteobacteria"(100);Alphaproteobacteria(100);Caulobacterales(100);Caulobacteraceae(100);unclassified(96);
Otu01275	127	Bacteria(100);"Proteobacteria"(100);Gammaproteobacteria(100);Xanthomonadales(100);Xanthomonadaceae(100);Lysobacter(100);
Otu01276	127	Bacteria(100);"Actinobacteria"(100);Actinobacteria(100);Acidimicrobiales(100);unclassified(100);unclassified(100);
Otu01277	126	Bacteria(100);"Actinobacteria"(100);Actinobacteria(100);Acidimicrobiales(100);Acidimicrobiaceae(100);Ilumatobacter(100);
Otu01278	126	Bacteria(100);unclassified(74);unclassified(74);unclassified(74);unclassified(74);unclassified(74);
Otu01279	126	Bacteria(100);"Proteobacteria"(94);unclassified(57);unclassified(57);unclassified(57);unclassified(57);
Otu01280	126	Bacteria(100);unclassified(100);unclassified(100);unclassified(100);unclassified(100);unclassified(100);
Otu01281	126	Bacteria(100);"Planctomycetes"(100);"Planctomycetacia"(100);Planctomycetales(100);Planctomycetaceae(100);unclassified(100);
Otu01282	126	Bacteria(100);"Acidobacteria"(100);Acidobacteria_Gp1(100);Acidobacteria_Gp1_order_incertae_sedis(100);Acidobacteria_Gp1_family_incertae_sedis(100);Gp1(100);
Otu01283	125	Bacteria(100);"Gemmatimonadetes"(100);Gemmatimonadetes(100);Gemmatimonadales(100);Gemmatimonadaceae(100);Gemmatimonas(100);
Otu01284	125	Bacteria(100);"Bacteroidetes"(100);"Sphingobacteria"(100);"Sphingobacteriales"(100);Chitinophagaceae(100);unclassified(100);
Otu01285	125	Bacteria(100);"Chloroflexi"(100);Anaerolineae(100);Anaerolineales(100);Anaerolineaceae(100);unclassified(100);
Otu01286	125	Bacteria(100);"Planctomycetes"(100);"Planctomycetacia"(100);Planctomycetales(100);Planctomycetaceae(100);Planctomyces(100);
Otu01287	125	Bacteria(100);"Proteobacteria"(100);Deltaproteobacteria(88);unclassified(86);unclassified(86);unclassified(86);
Otu01288	125	Bacteria(100);unclassified(98);unclassified(98);unclassified(98);unclassified(98);unclassified(98);
Otu01289	125	Bacteria(100);"Actinobacteria"(100);Actinobacteria(100);Actinomycetales(100);Micromonosporaceae(100);Actinoplanes(100);
Otu01290	125	Bacteria(100);unclassified(100);unclassified(100);unclassified(100);unclassified(100);unclassified(100);
Otu01291	125	Bacteria(100);"Bacteroidetes"(100);"Sphingobacteria"(100);"Sphingobacteriales"(100);unclassified(100);unclassified(100);
Otu01292	125	Bacteria(100);unclassified(96);unclassified(96);unclassified(96);unclassified(96);unclassified(96);
Otu01293	125	Bacteria(100);"Actinobacteria"(100);Actinobacteria(100);Actinomycetales(100);unclassified(100);unclassified(100);
Otu01294	125	Bacteria(100);unclassified(100);unclassified(100);unclassified(100);unclassified(100);unclassified(100);
Otu01295	124	Bacteria(100);"Actinobacteria"(100);Actinobacteria(100);unclassified(92);unclassified(92);unclassified(92);
Otu01296	124	Bacteria(100);"Bacteroidetes"(100);unclassified(100);unclassified(100);unclassified(100);unclassified(100);
Otu01297	124	Bacteria(100);unclassified(100);unclassified(100);unclassified(100);unclassified(100);unclassified(100);
Otu01298	124	Bacteria(100);"Bacteroidetes"(100);"Sphingobacteria"(100);"Sphingobacteriales"(100);Chitinophagaceae(100);Chitinophaga(96);
Otu01299	124	Bacteria(100);"Actinobacteria"(100);Actinobacteria(100);Actinomycetales(100);unclassified(100);unclassified(100);
Otu01300	123	Bacteria(100);"Actinobacteria"(100);Actinobacteria(100);Actinomycetales(100);Micromonosporaceae(100);unclassified(100);
Otu01301	123	Bacteria(100);unclassified(100);unclassified(100);unclassified(100);unclassified(100);unclassified(100);
Otu01302	123	Bacteria(100);"Bacteroidetes"(100);"Sphingobacteria"(100);"Sphingobacteriales"(100);Chitinophagaceae(82);unclassified(82);
Otu01303	123	Bacteria(100);Firmicutes(100);Clostridia(100);Clostridiales(100);Clostridiaceae_1(100);Clostridium_sensu_stricto(100);
Otu01304	123	Bacteria(100);"Proteobacteria"(72);unclassified(72);unclassified(72);unclassified(72);unclassified(72);
Otu01305	123	Bacteria(100);"Bacteroidetes"(100);"Sphingobacteria"(72);"Sphingobacteriales"(72);"Flammeovirgaceae"(70);unclassified(70);
Otu01306	123	Bacteria(100);unclassified(100);unclassified(100);unclassified(100);unclassified(100);unclassified(100);
Otu01307	123	Bacteria(100);"Proteobacteria"(100);Deltaproteobacteria(100);Desulfuromonadales(100);Geobacteraceae(100);Geobacter(100);
Otu01308	123	Bacteria(100);unclassified(100);unclassified(100);unclassified(100);unclassified(100);unclassified(100);
Otu01309	123	Bacteria(100);unclassified(100);unclassified(100);unclassified(100);unclassified(100);unclassified(100);
Otu01310	123	Bacteria(100);"Proteobacteria"(100);Alphaproteobacteria(100);unclassified(100);unclassified(100);unclassified(100);
Otu01311	122	Bacteria(100);"Chlamydiae"(100);Chlamydiae(100);Chlamydiales(100);Simkaniaceae(90);Simkania(90);
Otu01312	122	Bacteria(100);"Gemmatimonadetes"(100);Gemmatimonadetes(100);Gemmatimonadales(100);Gemmatimonadaceae(100);Gemmatimonas(100);
Otu01313	122	Bacteria(100);"Verrucomicrobia"(100);Spartobacteria(100);Spartobacteria_order_incertae_sedis(100);Spartobacteria_family_incertae_sedis(100);Spartobacteria_genera_incertae_sedis(75);
Otu01314	122	Bacteria(100);unclassified(100);unclassified(100);unclassified(100);unclassified(100);unclassified(100);
Otu01315	122	Bacteria(100);"Acidobacteria"(100);Acidobacteria_Gp10(100);Acidobacteria_Gp10_order_incertae_sedis(100);Acidobacteria_Gp10_family_incertae_sedis(100);Gp10(100);
Otu01316	122	Bacteria(100);"Bacteroidetes"(100);"Sphingobacteria"(100);"Sphingobacteriales"(100);Sphingobacteriaceae(100);Pedobacter(100);
Otu01317	122	Bacteria(100);"Proteobacteria"(100);Alphaproteobacteria(100);Rhizobiales(100);unclassified(100);unclassified(100);
Otu01318	122	Bacteria(100);"Planctomycetes"(100);"Planctomycetacia"(100);Planctomycetales(100);Planctomycetaceae(100);Singulisphaera(69);
Otu01319	122	Bacteria(100);"Acidobacteria"(100);Acidobacteria_Gp10(100);Acidobacteria_Gp10_order_incertae_sedis(100);Acidobacteria_Gp10_family_incertae_sedis(100);Gp10(100);
Otu01320	122	Bacteria(100);"Verrucomicrobia"(100);Opitutae(100);Opitutales(100);Opitutaceae(100);Opitutus(100);
Otu01321	121	Bacteria(100);"Proteobacteria"(100);Gammaproteobacteria(100);unclassified(100);unclassified(100);unclassified(100);
Otu01322	121	Bacteria(100);unclassified(100);unclassified(100);unclassified(100);unclassified(100);unclassified(100);
Otu01323	121	Bacteria(100);unclassified(100);unclassified(100);unclassified(100);unclassified(100);unclassified(100);
Otu01324	121	Bacteria(100);Firmicutes(100);Bacilli(100);Bacillales(100);unclassified(100);unclassified(100);
Otu01325	121	Bacteria(100);"Bacteroidetes"(100);"Sphingobacteria"(100);"Sphingobacteriales"(100);Chitinophagaceae(100);Ferruginibacter(100);
Otu01326	120	Bacteria(100);unclassified(100);unclassified(100);unclassified(100);unclassified(100);unclassified(100);
Otu01327	120	Bacteria(100);"Proteobacteria"(100);Betaproteobacteria(100);unclassified(98);unclassified(98);unclassified(98);
Otu01328	120	Bacteria(100);"Proteobacteria"(100);Alphaproteobacteria(100);Rhizobiales(100);Bradyrhizobiaceae(100);unclassified(100);
Otu01329	120	Bacteria(100);"Verrucomicrobia"(100);Subdivision3(100);Subdivision3_order_incertae_sedis(100);Subdivision3_family_incertae_sedis(100);3_genus_incertae_sedis(100);
Otu01330	120	Bacteria(100);"Proteobacteria"(100);Gammaproteobacteria(100);unclassified(97);unclassified(97);unclassified(97);
Otu01331	120	Bacteria(100);unclassified(85);unclassified(85);unclassified(85);unclassified(85);unclassified(85);
Otu01332	120	Bacteria(100);unclassified(100);unclassified(100);unclassified(100);unclassified(100);unclassified(100);
Otu01333	120	Bacteria(100);"Verrucomicrobia"(100);Subdivision3(100);Subdivision3_order_incertae_sedis(100);Subdivision3_family_incertae_sedis(100);3_genus_incertae_sedis(100);
Otu01334	119	Bacteria(100);"Planctomycetes"(100);"Planctomycetacia"(100);Planctomycetales(100);Planctomycetaceae(100);unclassified(100);
Otu01335	119	Bacteria(100);unclassified(100);unclassified(100);unclassified(100);unclassified(100);unclassified(100);
Otu01336	119	Bacteria(100);unclassified(100);unclassified(100);unclassified(100);unclassified(100);unclassified(100);
Otu01337	119	Bacteria(100);unclassified(100);unclassified(100);unclassified(100);unclassified(100);unclassified(100);
Otu01338	119	Bacteria(100);"Chloroflexi"(70);Thermomicrobia(61);unclassified(58);unclassified(58);unclassified(58);
Otu01339	119	Bacteria(100);"Acidobacteria"(100);Acidobacteria_Gp3(100);Acidobacteria_Gp3_order_incertae_sedis(100);Acidobacteria_Gp3_family_incertae_sedis(100);Gp3(100);
Otu01340	118	Bacteria(100);"Planctomycetes"(95);"Planctomycetacia"(95);Planctomycetales(95);Planctomycetaceae(95);unclassified(95);
Otu01341	118	Bacteria(100);"Proteobacteria"(100);Alphaproteobacteria(100);Caulobacterales(100);Caulobacteraceae(100);Brevundimonas(100);
Otu01342	118	Bacteria(100);"Actinobacteria"(100);Actinobacteria(100);Actinomycetales(100);unclassified(64);unclassified(64);
Otu01343	118	Bacteria(100);"Proteobacteria"(100);Betaproteobacteria(100);unclassified(63);unclassified(63);unclassified(63);
Otu01344	118	Bacteria(100);"Acidobacteria"(100);Acidobacteria_Gp3(100);Acidobacteria_Gp3_order_incertae_sedis(100);Acidobacteria_Gp3_family_incertae_sedis(100);Gp3(100);
Otu01345	118	Bacteria(100);"Verrucomicrobia"(100);Subdivision3(100);Subdivision3_order_incertae_sedis(100);Subdivision3_family_incertae_sedis(100);3_genus_incertae_sedis(100);
Otu01346	118	Bacteria(100);unclassified(100);unclassified(100);unclassified(100);unclassified(100);unclassified(100);
Otu01347	117	Bacteria(100);"Bacteroidetes"(100);"Sphingobacteria"(100);"Sphingobacteriales"(100);Chitinophagaceae(100);unclassified(100);
Otu01348	117	Bacteria(100);"Proteobacteria"(100);Alphaproteobacteria(100);Sphingomonadales(100);Sphingomonadaceae(100);Sphingomonas(100);
Otu01349	117	Bacteria(100);"Proteobacteria"(100);Betaproteobacteria(100);unclassified(100);unclassified(100);unclassified(100);
Otu01350	117	Bacteria(100);"Proteobacteria"(100);Deltaproteobacteria(100);Myxococcales(100);Myxococcaceae(100);unclassified(85);
Otu01351	117	Bacteria(100);"Proteobacteria"(100);Alphaproteobacteria(100);unclassified(100);unclassified(100);unclassified(100);
Otu01352	117	Bacteria(100);"Proteobacteria"(100);Gammaproteobacteria(100);unclassified(100);unclassified(100);unclassified(100);
Otu01353	117	Bacteria(100);unclassified(63);unclassified(63);unclassified(63);unclassified(63);unclassified(63);
Otu01354	117	Bacteria(100);"Proteobacteria"(100);Alphaproteobacteria(100);unclassified(100);unclassified(100);unclassified(100);
Otu01355	116	Bacteria(100);"Planctomycetes"(100);"Planctomycetacia"(100);Planctomycetales(100);Planctomycetaceae(100);unclassified(99);
Otu01356	116	Bacteria(100);"Actinobacteria"(100);Actinobacteria(100);unclassified(100);unclassified(100);unclassified(100);
Otu01357	116	Bacteria(100);"Gemmatimonadetes"(100);Gemmatimonadetes(100);Gemmatimonadales(100);Gemmatimonadaceae(100);Gemmatimonas(100);
Otu01358	116	Bacteria(100);"Proteobacteria"(100);Betaproteobacteria(100);Rhodocyclales(100);Rhodocyclaceae(100);Uliginosibacterium(99);
Otu01359	116	Bacteria(100);unclassified(100);unclassified(100);unclassified(100);unclassified(100);unclassified(100);
Otu01360	116	Bacteria(100);"Bacteroidetes"(100);"Sphingobacteria"(100);"Sphingobacteriales"(100);Chitinophagaceae(100);unclassified(68);
Otu01361	115	Bacteria(100);"Bacteroidetes"(100);"Sphingobacteria"(100);"Sphingobacteriales"(100);unclassified(100);unclassified(100);
Otu01362	115	Bacteria(100);Firmicutes(100);Bacilli(100);Bacillales(100);Pasteuriaceae(100);Pasteuria(100);
Otu01363	115	Bacteria(100);"Proteobacteria"(100);Betaproteobacteria(100);unclassified(100);unclassified(100);unclassified(100);
Otu01364	115	Bacteria(100);"Armatimonadetes"(100);Armatimonadetes_gp4_class_incertae_sedis(100);Armatimonadetes_gp4_order_incetae_sedis(100);Armatimonadetes_gp4_family_incetae_sedis(100);Armatimonadetes_gp4(100);
Otu01365	115	Bacteria(100);Firmicutes(100);Bacilli(100);Bacillales(100);Paenibacillaceae_1(100);Paenibacillus(100);
Otu01366	115	Bacteria(100);"Actinobacteria"(100);Actinobacteria(100);Actinomycetales(100);Nocardioidaceae(100);Nocardioides(93);
Otu01367	115	Bacteria(100);"Proteobacteria"(100);Deltaproteobacteria(100);Myxococcales(100);Nannocystaceae(52);unclassified(100);
Otu01369	115	Bacteria(100);Firmicutes(100);Bacilli(100);Bacillales(100);Paenibacillaceae_1(100);unclassified(100);
Otu01370	115	Bacteria(100);"Verrucomicrobia"(100);Subdivision3(100);Subdivision3_order_incertae_sedis(100);Subdivision3_family_incertae_sedis(100);3_genus_incertae_sedis(100);
Otu01371	115	Bacteria(100);unclassified(100);unclassified(100);unclassified(100);unclassified(100);unclassified(100);
Otu01372	115	Bacteria(100);WS3(75);WS3_class_incertae_sedis(75);WS3_order_incertae_sedis(75);WS3_family_incertae_sedis(75);WS3_genus_incertae_sedis(75);
Otu01373	115	Bacteria(100);"Proteobacteria"(100);unclassified(100);unclassified(100);unclassified(100);unclassified(100);
Otu01374	115	Bacteria(100);unclassified(100);unclassified(100);unclassified(100);unclassified(100);unclassified(100);
Otu01375	115	Bacteria(100);unclassified(100);unclassified(100);unclassified(100);unclassified(100);unclassified(100);
Otu01376	114	Bacteria(100);"Proteobacteria"(100);Alphaproteobacteria(100);Rhodospirillales(100);Acetobacteraceae(100);Roseomonas(100);
Otu01377	114	Bacteria(100);"Proteobacteria"(100);Deltaproteobacteria(100);Myxococcales(98);Polyangiaceae(98);unclassified(98);
Otu01378	114	Bacteria(100);"Proteobacteria"(100);Gammaproteobacteria(100);Chromatiales(100);Chromatiaceae(100);Rheinheimera(100);
Otu01379	114	Bacteria(100);"Actinobacteria"(100);Actinobacteria(100);Actinomycetales(100);unclassified(100);unclassified(100);
Otu01380	114	Bacteria(100);"Proteobacteria"(100);Alphaproteobacteria(100);Sphingomonadales(100);Sphingomonadaceae(100);Sphingomonas(100);
Otu01381	114	Bacteria(100);"Proteobacteria"(100);Deltaproteobacteria(100);Myxococcales(100);unclassified(100);unclassified(100);
Otu01382	113	Bacteria(100);"Planctomycetes"(100);"Planctomycetacia"(100);Planctomycetales(100);Planctomycetaceae(100);unclassified(100);
Otu01383	113	Bacteria(100);"Planctomycetes"(100);"Planctomycetacia"(100);Planctomycetales(100);Planctomycetaceae(100);unclassified(100);
Otu01384	113	Bacteria(100);"Planctomycetes"(100);"Planctomycetacia"(100);Planctomycetales(100);Planctomycetaceae(100);unclassified(100);
Otu01385	113	Bacteria(100);Firmicutes(100);Clostridia(100);Clostridiales(100);Clostridiaceae_1(100);Clostridium_sensu_stricto(100);
Otu01386	113	Bacteria(100);unclassified(100);unclassified(100);unclassified(100);unclassified(100);unclassified(100);
Otu01387	113	Bacteria(100);unclassified(100);unclassified(100);unclassified(100);unclassified(100);unclassified(100);
Otu01388	113	Bacteria(100);"Planctomycetes"(100);"Planctomycetacia"(100);Planctomycetales(100);Planctomycetaceae(100);unclassified(100);
Otu01389	113	Bacteria(100);"Planctomycetes"(100);"Planctomycetacia"(100);Planctomycetales(100);Planctomycetaceae(100);Singulisphaera(100);
Otu01390	113	Bacteria(100);"Proteobacteria"(100);unclassified(100);unclassified(100);unclassified(100);unclassified(100);
Otu01391	113	Bacteria(100);"Proteobacteria"(57);unclassified(100);unclassified(100);unclassified(100);unclassified(100);
Otu01392	113	Bacteria(100);"Proteobacteria"(100);Alphaproteobacteria(100);unclassified(100);unclassified(100);unclassified(100);
Otu01394	112	Bacteria(100);"Proteobacteria"(100);Gammaproteobacteria(100);unclassified(100);unclassified(100);unclassified(100);
Otu01395	112	Bacteria(100);"Bacteroidetes"(100);unclassified(100);unclassified(100);unclassified(100);unclassified(100);
Otu01396	112	Bacteria(100);"Acidobacteria"(100);Acidobacteria_Gp17(100);Acidobacteria_Gp17_order_incertae_sedis(100);Acidobacteria_Gp17_family_incertae_sedis(100);Gp17(100);
Otu01397	112	Bacteria(100);"Actinobacteria"(100);Actinobacteria(100);Actinomycetales(100);Pseudonocardiaceae(100);unclassified(92);
Otu01398	112	Bacteria(100);"Gemmatimonadetes"(100);Gemmatimonadetes(100);Gemmatimonadales(100);Gemmatimonadaceae(100);Gemmatimonas(100);
Otu01399	112	Bacteria(100);unclassified(100);unclassified(100);unclassified(100);unclassified(100);unclassified(100);
Otu01400	112	Bacteria(100);"Actinobacteria"(100);Actinobacteria(100);Actinomycetales(100);Micromonosporaceae(100);Catelliglobosispora(84);
Otu01401	112	Bacteria(100);"Proteobacteria"(100);unclassified(100);unclassified(100);unclassified(100);unclassified(100);
Otu01402	112	Bacteria(100);"Proteobacteria"(55);unclassified(55);unclassified(55);unclassified(55);unclassified(55);
Otu01403	112	Bacteria(100);"Chlamydiae"(100);Chlamydiae(100);Chlamydiales(100);unclassified(100);unclassified(100);
Otu01404	112	Bacteria(100);"Armatimonadetes"(100);Armatimonadetes_gp4_class_incertae_sedis(100);Armatimonadetes_gp4_order_incetae_sedis(100);Armatimonadetes_gp4_family_incetae_sedis(100);Armatimonadetes_gp4(100);
Otu01405	112	Bacteria(100);"Planctomycetes"(100);"Planctomycetacia"(100);Planctomycetales(100);Planctomycetaceae(100);Gemmata(100);
Otu01406	112	Bacteria(100);unclassified(100);unclassified(100);unclassified(100);unclassified(100);unclassified(100);
Otu01407	111	Bacteria(100);unclassified(100);unclassified(100);unclassified(100);unclassified(100);unclassified(100);
Otu01408	111	Bacteria(100);unclassified(100);unclassified(100);unclassified(100);unclassified(100);unclassified(100);
Otu01409	111	Bacteria(100);unclassified(100);unclassified(100);unclassified(100);unclassified(100);unclassified(100);
Otu01410	111	Bacteria(100);"Proteobacteria"(100);Deltaproteobacteria(66);unclassified(66);unclassified(66);unclassified(66);
Otu01411	111	Bacteria(100);unclassified(100);unclassified(100);unclassified(100);unclassified(100);unclassified(100);
Otu01412	111	Bacteria(100);"Bacteroidetes"(100);unclassified(100);unclassified(100);unclassified(100);unclassified(100);
Otu01413	111	Bacteria(100);unclassified(100);unclassified(100);unclassified(100);unclassified(100);unclassified(100);
Otu01414	110	Bacteria(100);"Verrucomicrobia"(85);Verrucomicrobiae(82);Verrucomicrobiales(82);Verrucomicrobiaceae(82);unclassified(82);
Otu01415	110	Bacteria(100);"Proteobacteria"(100);Alphaproteobacteria(100);Rhodospirillales(100);Rhodospirillaceae(51);unclassified(51);
Otu01416	110	Bacteria(100);OD1(100);OD1_class_incertae_sedis(100);OD1_order_incertae_sedis(100);OD1_family_incertae_sedis(100);OD1_genus_incertae_sedis(100);
Otu01417	110	Bacteria(100);"Proteobacteria"(100);Gammaproteobacteria(100);Xanthomonadales(100);Xanthomonadaceae(100);Arenimonas(100);
Otu01418	110	Bacteria(100);OD1(92);OD1_class_incertae_sedis(92);OD1_order_incertae_sedis(92);OD1_family_incertae_sedis(92);OD1_genus_incertae_sedis(92);
Otu01419	110	Bacteria(100);"Acidobacteria"(100);Acidobacteria_Gp16(100);Acidobacteria_Gp16_order_incertae_sedis(100);Acidobacteria_Gp16_family_incertae_sedis(100);Gp16(100);
Otu01420	110	Bacteria(100);"Actinobacteria"(100);Actinobacteria(100);Actinomycetales(100);Nocardiaceae(100);Nocardia(100);
Otu01421	110	Bacteria(100);"Bacteroidetes"(100);"Sphingobacteria"(99);"Sphingobacteriales"(99);unclassified(99);unclassified(99);
Otu01422	110	Bacteria(100);unclassified(100);unclassified(100);unclassified(100);unclassified(100);unclassified(100);
Otu01423	110	Bacteria(100);"Proteobacteria"(100);Alphaproteobacteria(100);Sphingomonadales(100);Sphingomonadaceae(94);Novosphingobium(87);
Otu01424	110	Bacteria(100);"Proteobacteria"(100);Alphaproteobacteria(100);Rhizobiales(100);Hyphomicrobiaceae(100);unclassified(73);
Otu01425	110	Bacteria(100);unclassified(100);unclassified(100);unclassified(100);unclassified(100);unclassified(100);
Otu01426	109	Bacteria(100);"Proteobacteria"(100);Alphaproteobacteria(100);Rhizobiales(100);unclassified(100);unclassified(100);
Otu01427	109	Bacteria(100);unclassified(53);unclassified(53);unclassified(53);unclassified(53);unclassified(53);
Otu01428	109	Bacteria(100);"Planctomycetes"(100);"Planctomycetacia"(100);Planctomycetales(100);Planctomycetaceae(100);unclassified(100);
Otu01429	109	Bacteria(100);unclassified(99);unclassified(99);unclassified(99);unclassified(99);unclassified(99);
Otu01430	109	Bacteria(100);"Proteobacteria"(100);Deltaproteobacteria(100);Myxococcales(100);Polyangiaceae(100);unclassified(59);
Otu01431	109	Bacteria(100);"Proteobacteria"(100);Alphaproteobacteria(100);Rhodospirillales(100);Acetobacteraceae(100);Acidiphilium(56);
Otu01432	109	Bacteria(100);"Actinobacteria"(100);Actinobacteria(100);unclassified(100);unclassified(100);unclassified(100);
Otu01433	109	Bacteria(100);"Planctomycetes"(100);"Planctomycetacia"(100);Planctomycetales(100);Planctomycetaceae(100);unclassified(100);
Otu01434	109	Bacteria(100);"Planctomycetes"(100);"Planctomycetacia"(100);Planctomycetales(100);Planctomycetaceae(100);unclassified(68);
Otu01435	109	Bacteria(100);unclassified(100);unclassified(100);unclassified(100);unclassified(100);unclassified(100);
Otu01436	109	Bacteria(100);"Proteobacteria"(100);Alphaproteobacteria(100);Rhizobiales(100);Rhizobiales_incertae_sedis(67);Bauldia(52);
Otu01437	109	Bacteria(100);unclassified(100);unclassified(100);unclassified(100);unclassified(100);unclassified(100);
Otu01438	108	Bacteria(100);"Planctomycetes"(100);"Planctomycetacia"(100);Planctomycetales(100);Planctomycetaceae(100);unclassified(100);
Otu01439	108	Bacteria(100);"Planctomycetes"(100);"Planctomycetacia"(100);Planctomycetales(100);Planctomycetaceae(100);unclassified(99);
Otu01440	108	Bacteria(100);unclassified(100);unclassified(100);unclassified(100);unclassified(100);unclassified(100);
Otu01441	108	Bacteria(100);unclassified(100);unclassified(100);unclassified(100);unclassified(100);unclassified(100);
Otu01442	108	Bacteria(100);"Planctomycetes"(100);"Planctomycetacia"(100);Planctomycetales(100);Planctomycetaceae(100);unclassified(80);
Otu01443	108	Bacteria(100);unclassified(100);unclassified(100);unclassified(100);unclassified(100);unclassified(100);
Otu01444	108	Bacteria(100);unclassified(100);unclassified(100);unclassified(100);unclassified(100);unclassified(100);
Otu01445	107	Bacteria(100);unclassified(100);unclassified(100);unclassified(100);unclassified(100);unclassified(100);
Otu01446	107	Bacteria(100);"Proteobacteria"(100);Alphaproteobacteria(100);Rhizobiales(100);Hyphomicrobiaceae(58);Rhodoplanes(58);
Otu01447	107	Bacteria(100);"Actinobacteria"(100);Actinobacteria(100);Acidimicrobiales(100);unclassified(100);unclassified(100);
Otu01448	107	Bacteria(100);"Chlamydiae"(100);Chlamydiae(100);Chlamydiales(100);Parachlamydiaceae(100);unclassified(89);
Otu01449	107	Bacteria(100);unclassified(78);unclassified(78);unclassified(78);unclassified(78);unclassified(78);
Otu01450	107	Bacteria(100);unclassified(100);unclassified(100);unclassified(100);unclassified(100);unclassified(100);
Otu01451	107	Bacteria(100);"Proteobacteria"(100);Deltaproteobacteria(100);unclassified(100);unclassified(100);unclassified(100);
Otu01452	107	Bacteria(100);unclassified(100);unclassified(100);unclassified(100);unclassified(100);unclassified(100);
Otu01453	107	Bacteria(100);"Gemmatimonadetes"(100);Gemmatimonadetes(100);Gemmatimonadales(100);Gemmatimonadaceae(100);Gemmatimonas(100);
Otu01454	107	Bacteria(100);unclassified(100);unclassified(100);unclassified(100);unclassified(100);unclassified(100);
Otu01455	106	Bacteria(100);unclassified(100);unclassified(100);unclassified(100);unclassified(100);unclassified(100);
Otu01456	106	Bacteria(100);"Proteobacteria"(100);Deltaproteobacteria(100);Myxococcales(100);unclassified(52);unclassified(52);
Otu01457	106	Bacteria(100);"Planctomycetes"(100);"Planctomycetacia"(100);Planctomycetales(100);Planctomycetaceae(100);Planctomyces(100);
Otu01458	106	Bacteria(100);unclassified(98);unclassified(98);unclassified(98);unclassified(98);unclassified(98);
Otu01459	106	Bacteria(100);"Planctomycetes"(100);"Planctomycetacia"(100);Planctomycetales(100);Planctomycetaceae(100);Zavarzinella(100);
Otu01460	106	Bacteria(100);"Proteobacteria"(99);unclassified(99);unclassified(99);unclassified(99);unclassified(99);
Otu01461	106	Bacteria(100);"Proteobacteria"(100);Deltaproteobacteria(100);Bdellovibrionales(100);Bacteriovoracaceae(100);Peredibacter(100);
Otu01462	106	Bacteria(100);"Planctomycetes"(100);"Planctomycetacia"(100);Planctomycetales(100);Planctomycetaceae(100);unclassified(100);
Otu01463	105	Bacteria(100);"Bacteroidetes"(100);"Sphingobacteria"(100);"Sphingobacteriales"(100);Chitinophagaceae(100);unclassified(100);
Otu01464	105	Bacteria(100);unclassified(100);unclassified(100);unclassified(100);unclassified(100);unclassified(100);
Otu01465	105	Bacteria(100);"Actinobacteria"(100);Actinobacteria(100);Solirubrobacterales(100);Solirubrobacteraceae(100);Solirubrobacter(100);
Otu01466	105	Bacteria(100);"Actinobacteria"(93);Actinobacteria(93);unclassified(93);unclassified(93);unclassified(93);
Otu01467	105	Bacteria(100);Firmicutes(98);Bacilli(98);Bacillales(98);Pasteuriaceae(98);Pasteuria(98);
Otu01468	105	Bacteria(100);unclassified(100);unclassified(100);unclassified(100);unclassified(100);unclassified(100);
Otu01469	105	Bacteria(100);unclassified(100);unclassified(100);unclassified(100);unclassified(100);unclassified(100);
Otu01470	105	Bacteria(100);unclassified(100);unclassified(100);unclassified(100);unclassified(100);unclassified(100);
Otu01471	105	Bacteria(100);"Planctomycetes"(100);"Planctomycetacia"(100);Planctomycetales(100);Planctomycetaceae(100);unclassified(100);
Otu01472	105	Bacteria(100);unclassified(55);unclassified(55);unclassified(55);unclassified(55);unclassified(55);
Otu01473	104	Bacteria(100);unclassified(100);unclassified(100);unclassified(100);unclassified(100);unclassified(100);
Otu01474	104	Bacteria(100);"Bacteroidetes"(100);Flavobacteria(100);"Flavobacteriales"(100);Flavobacteriaceae(100);unclassified(100);
Otu01475	104	Bacteria(100);"Bacteroidetes"(100);"Sphingobacteria"(100);"Sphingobacteriales"(100);Chitinophagaceae(100);Ferruginibacter(100);
Otu01476	104	Bacteria(100);"Acidobacteria"(100);Acidobacteria_Gp3(100);Acidobacteria_Gp3_order_incertae_sedis(100);Acidobacteria_Gp3_family_incertae_sedis(100);Gp3(100);
Otu01477	104	Bacteria(100);unclassified(100);unclassified(100);unclassified(100);unclassified(100);unclassified(100);
Otu01478	104	Bacteria(100);Firmicutes(100);Bacilli(100);Bacillales(100);Pasteuriaceae(100);Pasteuria(100);
Otu01479	104	Bacteria(100);"Gemmatimonadetes"(100);Gemmatimonadetes(100);Gemmatimonadales(100);Gemmatimonadaceae(100);Gemmatimonas(100);
Otu01480	104	Bacteria(100);unclassified(69);unclassified(69);unclassified(69);unclassified(69);unclassified(69);
Otu01481	104	Bacteria(100);"Bacteroidetes"(100);"Sphingobacteria"(100);"Sphingobacteriales"(100);Chitinophagaceae(100);unclassified(100);
Otu01482	103	Bacteria(100);unclassified(100);unclassified(100);unclassified(100);unclassified(100);unclassified(100);
Otu01483	103	Bacteria(100);"Planctomycetes"(100);"Planctomycetacia"(100);Planctomycetales(100);Planctomycetaceae(100);unclassified(98);
Otu01484	103	Bacteria(100);"Proteobacteria"(100);Gammaproteobacteria(100);Xanthomonadales(100);Sinobacteraceae(100);Steroidobacter(100);
Otu01485	103	Bacteria(100);"Bacteroidetes"(100);"Sphingobacteria"(76);"Sphingobacteriales"(76);unclassified(76);unclassified(76);
Otu01486	103	Bacteria(100);"Bacteroidetes"(100);"Sphingobacteria"(100);"Sphingobacteriales"(100);Chitinophagaceae(100);unclassified(100);
Otu01487	103	Bacteria(100);unclassified(100);unclassified(100);unclassified(100);unclassified(100);unclassified(100);
Otu01488	103	Bacteria(100);unclassified(100);unclassified(100);unclassified(100);unclassified(100);unclassified(100);
Otu01489	103	Bacteria(100);"Proteobacteria"(97);Deltaproteobacteria(71);unclassified(71);unclassified(71);unclassified(71);
Otu01490	102	Bacteria(100);unclassified(100);unclassified(100);unclassified(100);unclassified(100);unclassified(100);
Otu01491	102	Bacteria(100);unclassified(100);unclassified(100);unclassified(100);unclassified(100);unclassified(100);
Otu01492	102	Bacteria(100);"Proteobacteria"(100);Alphaproteobacteria(100);Sphingomonadales(100);Sphingomonadaceae(100);Sphingopyxis(100);
Otu01493	102	Bacteria(100);unclassified(100);unclassified(100);unclassified(100);unclassified(100);unclassified(100);
Otu01494	102	Bacteria(100);unclassified(91);unclassified(91);unclassified(91);unclassified(91);unclassified(91);
Otu01495	102	Bacteria(100);unclassified(100);unclassified(100);unclassified(100);unclassified(100);unclassified(100);
Otu01496	102	Bacteria(100);unclassified(100);unclassified(100);unclassified(100);unclassified(100);unclassified(100);
Otu01497	102	Bacteria(100);"Acidobacteria"(100);Acidobacteria_Gp3(100);Acidobacteria_Gp3_order_incertae_sedis(100);Acidobacteria_Gp3_family_incertae_sedis(100);Gp3(100);
Otu01498	102	Bacteria(100);"Verrucomicrobia"(100);Subdivision3(100);Subdivision3_order_incertae_sedis(100);Subdivision3_family_incertae_sedis(100);3_genus_incertae_sedis(100);
Otu01499	101	Bacteria(100);"Proteobacteria"(100);Alphaproteobacteria(100);unclassified(100);unclassified(100);unclassified(100);
Otu01500	101	Bacteria(100);unclassified(100);unclassified(100);unclassified(100);unclassified(100);unclassified(100);
Otu01501	101	Bacteria(100);unclassified(100);unclassified(100);unclassified(100);unclassified(100);unclassified(100);
Otu01502	101	Bacteria(100);"Actinobacteria"(100);Actinobacteria(100);Acidimicrobiales(99);unclassified(99);unclassified(99);
Otu01503	101	Bacteria(100);unclassified(69);unclassified(69);unclassified(69);unclassified(69);unclassified(69);
Otu01504	101	Bacteria(100);"Proteobacteria"(100);Alphaproteobacteria(100);Sphingomonadales(100);Sphingomonadaceae(100);unclassified(100);
Otu01505	101	Bacteria(100);"Planctomycetes"(100);"Planctomycetacia"(100);Planctomycetales(100);Planctomycetaceae(100);unclassified(100);
Otu01506	101	Bacteria(100);"Proteobacteria"(100);Alphaproteobacteria(100);Rhodospirillales(100);unclassified(98);unclassified(98);
Otu01507	101	Bacteria(100);"Proteobacteria"(100);unclassified(53);unclassified(53);unclassified(53);unclassified(53);
Otu01508	101	Bacteria(100);"Proteobacteria"(100);Alphaproteobacteria(100);unclassified(100);unclassified(100);unclassified(100);
Otu01509	100	Bacteria(100);"Acidobacteria"(100);Acidobacteria_Gp6(100);Acidobacteria_Gp6_order_incertae_sedis(100);Acidobacteria_Gp6_family_incertae_sedis(100);Gp6(100);
Otu01510	100	Bacteria(100);"Proteobacteria"(100);Deltaproteobacteria(100);Myxococcales(100);unclassified(90);unclassified(90);
Otu01511	100	Bacteria(100);unclassified(100);unclassified(100);unclassified(100);unclassified(100);unclassified(100);
Otu01512	100	Bacteria(100);"Planctomycetes"(100);"Planctomycetacia"(100);Planctomycetales(100);Planctomycetaceae(100);unclassified(100);
Otu01513	100	Bacteria(100);Firmicutes(100);Bacilli(100);Bacillales(100);Paenibacillaceae_1(97);unclassified(91);
Otu01514	100	Bacteria(100);Firmicutes(100);Bacilli(100);Bacillales(100);Paenibacillaceae_1(100);unclassified(100);
Otu01515	99	Bacteria(100);Firmicutes(100);Bacilli(100);Bacillales(100);Paenibacillaceae_1(94);unclassified(56);
Otu01516	99	Bacteria(100);"Proteobacteria"(100);Alphaproteobacteria(100);Alphaproteobacteria_order_incertae_sedis(96);Alphaproteobacteria_family_incertae_sedis(96);Rhizomicrobium(96);
Otu01517	99	Bacteria(100);unclassified(100);unclassified(100);unclassified(100);unclassified(100);unclassified(100);
Otu01518	99	Bacteria(100);"Verrucomicrobia"(100);Spartobacteria(100);Spartobacteria_order_incertae_sedis(100);Spartobacteria_family_incertae_sedis(100);Spartobacteria_genera_incertae_sedis(100);
Otu01519	99	Bacteria(100);"Proteobacteria"(100);unclassified(90);unclassified(90);unclassified(90);unclassified(90);
Otu01520	99	Bacteria(100);unclassified(100);unclassified(100);unclassified(100);unclassified(100);unclassified(100);
Otu01521	99	Bacteria(100);"Proteobacteria"(100);Gammaproteobacteria(100);unclassified(100);unclassified(100);unclassified(100);
Otu01522	99	Bacteria(100);unclassified(100);unclassified(100);unclassified(100);unclassified(100);unclassified(100);
Otu01523	99	Bacteria(100);"Acidobacteria"(86);Acidobacteria_Gp4(86);Acidobacteria_Gp4_order_incertae_sedis(86);Acidobacteria_Gp4_family_incertae_sedis(86);Gp4(86);
Otu01524	99	Bacteria(100);"Proteobacteria"(100);Alphaproteobacteria(100);Rhodospirillales(100);unclassified(89);unclassified(89);
Otu01525	99	Bacteria(100);"Verrucomicrobia"(100);Subdivision3(100);Subdivision3_order_incertae_sedis(100);Subdivision3_family_incertae_sedis(100);3_genus_incertae_sedis(100);
Otu01526	98	Bacteria(100);unclassified(100);unclassified(100);unclassified(100);unclassified(100);unclassified(100);
Otu01527	98	Bacteria(100);"Planctomycetes"(100);"Planctomycetacia"(100);Planctomycetales(100);Planctomycetaceae(100);Planctomyces(100);
Otu01528	98	Bacteria(100);"Planctomycetes"(99);"Planctomycetacia"(99);Planctomycetales(99);Planctomycetaceae(99);unclassified(99);
Otu01529	98	Bacteria(100);"Acidobacteria"(100);Acidobacteria_Gp20(100);Acidobacteria_Gp20_order_incertae_sedis(100);Acidobacteria_Gp20_family_incertae_sedis(100);Gp20(100);
Otu01530	98	Bacteria(100);"Proteobacteria"(100);Alphaproteobacteria(100);Rhodobacterales(100);Rhodobacteraceae(100);Amaricoccus(94);
Otu01531	98	Bacteria(100);"Actinobacteria"(100);Actinobacteria(100);Actinomycetales(100);Micromonosporaceae(100);unclassified(100);
Otu01532	98	Bacteria(100);"Verrucomicrobia"(100);Spartobacteria(100);Spartobacteria_order_incertae_sedis(100);Spartobacteria_family_incertae_sedis(100);Spartobacteria_genera_incertae_sedis(100);
Otu01533	98	Bacteria(100);unclassified(60);unclassified(60);unclassified(60);unclassified(60);unclassified(60);
Otu01534	98	Bacteria(100);"Acidobacteria"(100);Acidobacteria_Gp5(100);Acidobacteria_Gp5_order_incertae_sedis(100);Acidobacteria_Gp5_family_incertae_sedis(100);Gp5(100);
Otu01535	98	Bacteria(100);"Acidobacteria"(100);Acidobacteria_Gp3(100);Acidobacteria_Gp3_order_incertae_sedis(100);Acidobacteria_Gp3_family_incertae_sedis(100);Gp3(100);
Otu01536	98	Bacteria(100);"Proteobacteria"(100);Alphaproteobacteria(100);Rhizobiales(100);Phyllobacteriaceae(100);Phyllobacterium(100);
Otu01537	98	Bacteria(100);"Proteobacteria"(100);Betaproteobacteria(100);unclassified(100);unclassified(100);unclassified(100);
Otu01538	98	Bacteria(100);unclassified(100);unclassified(100);unclassified(100);unclassified(100);unclassified(100);
Otu01539	98	Bacteria(100);unclassified(100);unclassified(100);unclassified(100);unclassified(100);unclassified(100);
Otu01540	98	Bacteria(100);"Bacteroidetes"(100);"Sphingobacteria"(100);"Sphingobacteriales"(100);unclassified(100);unclassified(100);
Otu01541	98	Bacteria(100);"Bacteroidetes"(100);"Sphingobacteria"(100);"Sphingobacteriales"(100);Chitinophagaceae(100);Flavisolibacter(96);
Otu01542	97	Bacteria(100);"Proteobacteria"(100);Deltaproteobacteria(100);Myxococcales(100);unclassified(100);unclassified(100);
Otu01543	97	Bacteria(100);"Verrucomicrobia"(100);unclassified(69);unclassified(69);unclassified(69);unclassified(69);
Otu01544	97	Bacteria(100);"Planctomycetes"(100);"Planctomycetacia"(100);Planctomycetales(100);Planctomycetaceae(100);Planctomyces(55);
Otu01545	97	Bacteria(100);unclassified(100);unclassified(100);unclassified(100);unclassified(100);unclassified(100);
Otu01546	97	Bacteria(100);"Acidobacteria"(100);Acidobacteria_Gp3(100);Acidobacteria_Gp3_order_incertae_sedis(98);Acidobacteria_Gp3_family_incertae_sedis(98);Gp3(98);
Otu01547	97	Bacteria(100);unclassified(100);unclassified(100);unclassified(100);unclassified(100);unclassified(100);
Otu01548	97	Bacteria(100);"Proteobacteria"(100);Alphaproteobacteria(100);unclassified(100);unclassified(100);unclassified(100);
Otu01549	97	Bacteria(100);unclassified(100);unclassified(100);unclassified(100);unclassified(100);unclassified(100);
Otu01550	97	Bacteria(100);"Gemmatimonadetes"(100);Gemmatimonadetes(100);Gemmatimonadales(100);Gemmatimonadaceae(100);Gemmatimonas(100);
Otu01551	97	Bacteria(100);unclassified(88);unclassified(88);unclassified(88);unclassified(88);unclassified(88);
Otu01552	97	Bacteria(100);"Proteobacteria"(100);Alphaproteobacteria(100);unclassified(100);unclassified(100);unclassified(100);
Otu01553	97	Bacteria(100);"Acidobacteria"(100);Acidobacteria_Gp4(100);Acidobacteria_Gp4_order_incertae_sedis(100);Acidobacteria_Gp4_family_incertae_sedis(100);Gp4(100);
Otu01554	97	Bacteria(100);"Proteobacteria"(100);Deltaproteobacteria(100);unclassified(100);unclassified(100);unclassified(100);
Otu01555	97	Bacteria(100);"Proteobacteria"(100);Gammaproteobacteria(100);unclassified(100);unclassified(100);unclassified(100);
Otu01556	97	Bacteria(100);"Acidobacteria"(100);Acidobacteria_Gp4(100);Acidobacteria_Gp4_order_incertae_sedis(100);Acidobacteria_Gp4_family_incertae_sedis(100);Gp4(100);
Otu01557	97	Bacteria(100);unclassified(100);unclassified(100);unclassified(100);unclassified(100);unclassified(100);
Otu01558	97	Bacteria(100);"Actinobacteria"(100);Actinobacteria(100);Actinomycetales(100);Micromonosporaceae(97);unclassified(97);
Otu01559	97	Bacteria(100);Firmicutes(100);Clostridia(100);Clostridiales(100);Clostridiaceae_1(100);Clostridium_sensu_stricto(100);
Otu01560	97	Bacteria(100);unclassified(94);unclassified(94);unclassified(94);unclassified(94);unclassified(94);
Otu01561	97	Bacteria(100);"Planctomycetes"(100);"Planctomycetacia"(100);Planctomycetales(100);Planctomycetaceae(100);unclassified(100);
Otu01562	97	Bacteria(100);"Planctomycetes"(100);"Planctomycetacia"(100);Planctomycetales(100);Planctomycetaceae(100);Zavarzinella(100);
Otu01563	97	Bacteria(100);Firmicutes(100);Bacilli(100);Bacillales(100);Bacillaceae_1(97);unclassified(82);
Otu01564	97	Bacteria(100);unclassified(100);unclassified(100);unclassified(100);unclassified(100);unclassified(100);
Otu01565	96	Bacteria(100);unclassified(100);unclassified(100);unclassified(100);unclassified(100);unclassified(100);
Otu01566	96	Bacteria(100);"Acidobacteria"(100);Acidobacteria_Gp17(100);Acidobacteria_Gp17_order_incertae_sedis(100);Acidobacteria_Gp17_family_incertae_sedis(100);Gp17(100);
Otu01567	96	Bacteria(100);"Verrucomicrobia"(100);Subdivision3(100);Subdivision3_order_incertae_sedis(100);Subdivision3_family_incertae_sedis(100);3_genus_incertae_sedis(100);
Otu01568	96	Bacteria(100);"Bacteroidetes"(100);"Sphingobacteria"(100);"Sphingobacteriales"(100);Chitinophagaceae(100);Terrimonas(97);
Otu01569	96	Bacteria(100);Firmicutes(100);Clostridia(87);unclassified(87);unclassified(87);unclassified(87);
Otu01570	96	Bacteria(100);"Bacteroidetes"(100);"Bacteroidia"(100);"Bacteroidales"(100);"Porphyromonadaceae"(100);unclassified(85);
Otu01571	96	Bacteria(100);"Planctomycetes"(100);"Planctomycetacia"(100);Planctomycetales(100);Planctomycetaceae(100);Singulisphaera(100);
Otu01572	96	Bacteria(100);"Bacteroidetes"(100);"Sphingobacteria"(100);"Sphingobacteriales"(100);Sphingobacteriaceae(100);Sphingobacterium(98);
Otu01573	96	Bacteria(100);"Chloroflexi"(100);unclassified(72);unclassified(72);unclassified(72);unclassified(72);
Otu01574	96	Bacteria(100);"Proteobacteria"(100);Alphaproteobacteria(100);Rhizobiales(100);Rhizobiales_incertae_sedis(90);Bauldia(90);
Otu01575	96	Bacteria(100);"Bacteroidetes"(100);unclassified(100);unclassified(100);unclassified(100);unclassified(100);
Otu01576	95	Bacteria(100);unclassified(100);unclassified(100);unclassified(100);unclassified(100);unclassified(100);
Otu01577	95	Bacteria(100);"Bacteroidetes"(100);unclassified(100);unclassified(100);unclassified(100);unclassified(100);
Otu01578	95	Bacteria(100);unclassified(100);unclassified(100);unclassified(100);unclassified(100);unclassified(100);
Otu01579	95	Bacteria(100);"Acidobacteria"(100);Acidobacteria_Gp17(100);Acidobacteria_Gp17_order_incertae_sedis(100);Acidobacteria_Gp17_family_incertae_sedis(100);Gp17(100);
Otu01580	95	Bacteria(100);unclassified(100);unclassified(100);unclassified(100);unclassified(100);unclassified(100);
Otu01581	95	Bacteria(100);"Acidobacteria"(100);unclassified(89);unclassified(89);unclassified(89);unclassified(89);
Otu01582	95	Bacteria(100);Firmicutes(100);Clostridia(100);Clostridiales(100);Clostridiales_Incertae_Sedis_XI(100);Tissierella(100);
Otu01583	95	Bacteria(100);"Proteobacteria"(100);Gammaproteobacteria(100);unclassified(100);unclassified(100);unclassified(100);
Otu01584	95	Bacteria(100);"Bacteroidetes"(100);Flavobacteria(100);"Flavobacteriales"(100);Flavobacteriaceae(100);Flavobacterium(100);
Otu01585	94	Bacteria(100);unclassified(100);unclassified(100);unclassified(100);unclassified(100);unclassified(100);
Otu01586	94	Bacteria(100);"Verrucomicrobia"(100);Spartobacteria(100);Spartobacteria_order_incertae_sedis(100);Spartobacteria_family_incertae_sedis(100);Spartobacteria_genera_incertae_sedis(100);
Otu01587	94	Bacteria(100);"Gemmatimonadetes"(87);Gemmatimonadetes(87);Gemmatimonadales(87);Gemmatimonadaceae(87);Gemmatimonas(87);
Otu01588	94	Bacteria(100);"Gemmatimonadetes"(100);Gemmatimonadetes(100);Gemmatimonadales(100);Gemmatimonadaceae(100);Gemmatimonas(100);
Otu01589	94	Bacteria(100);"Bacteroidetes"(100);unclassified(100);unclassified(100);unclassified(100);unclassified(100);
Otu01590	94	Bacteria(100);"Bacteroidetes"(100);unclassified(100);unclassified(100);unclassified(100);unclassified(100);
Otu01591	94	Bacteria(100);"Bacteroidetes"(100);unclassified(100);unclassified(100);unclassified(100);unclassified(100);
Otu01592	94	Bacteria(100);"Planctomycetes"(100);"Planctomycetacia"(100);Planctomycetales(100);Planctomycetaceae(100);unclassified(94);
Otu01593	94	Bacteria(100);"Proteobacteria"(100);Alphaproteobacteria(100);unclassified(100);unclassified(100);unclassified(100);
Otu01594	94	Bacteria(100);"Proteobacteria"(100);Alphaproteobacteria(100);unclassified(54);unclassified(54);unclassified(54);
Otu01595	94	Bacteria(100);unclassified(100);unclassified(100);unclassified(100);unclassified(100);unclassified(100);
Otu01596	94	Bacteria(100);"Proteobacteria"(100);Gammaproteobacteria(100);Xanthomonadales(100);Xanthomonadaceae(100);Dokdonella(94);
Otu01597	94	Bacteria(100);"Planctomycetes"(100);"Planctomycetacia"(100);Planctomycetales(100);Planctomycetaceae(100);Gemmata(97);
Otu01598	94	Bacteria(100);unclassified(100);unclassified(100);unclassified(100);unclassified(100);unclassified(100);
Otu01599	93	Bacteria(100);unclassified(100);unclassified(100);unclassified(100);unclassified(100);unclassified(100);
Otu01600	93	Bacteria(100);"Planctomycetes"(100);"Planctomycetacia"(100);Planctomycetales(100);Planctomycetaceae(100);Zavarzinella(90);
Otu01601	93	Bacteria(100);"Actinobacteria"(100);Actinobacteria(100);Actinomycetales(100);Acidothermaceae(100);Acidothermus(100);
Otu01602	93	Bacteria(100);Firmicutes(100);Bacilli(100);Bacillales(100);unclassified(81);unclassified(81);
Otu01603	93	Bacteria(100);unclassified(100);unclassified(100);unclassified(100);unclassified(100);unclassified(100);
Otu01604	93	Bacteria(100);"Proteobacteria"(100);Gammaproteobacteria(100);unclassified(100);unclassified(100);unclassified(100);
Otu01605	93	Bacteria(100);"Bacteroidetes"(100);"Sphingobacteria"(69);"Sphingobacteriales"(69);unclassified(62);unclassified(62);
Otu01606	93	Bacteria(100);"Proteobacteria"(100);Deltaproteobacteria(99);unclassified(99);unclassified(99);unclassified(99);
Otu01607	92	Bacteria(100);unclassified(100);unclassified(100);unclassified(100);unclassified(100);unclassified(100);
Otu01608	92	Bacteria(100);"Acidobacteria"(100);Acidobacteria_Gp22(100);Acidobacteria_Gp22_order_incertae_sedis(100);Acidobacteria_Gp22_family_incertae_sedis(100);Gp22(100);
Otu01609	92	Bacteria(100);"Proteobacteria"(100);Alphaproteobacteria(100);unclassified(100);unclassified(100);unclassified(100);
Otu01610	92	Bacteria(100);"Proteobacteria"(100);Deltaproteobacteria(100);Bdellovibrionales(100);Bacteriovoracaceae(100);Bacteriovorax(100);
Otu01611	92	Bacteria(100);"Gemmatimonadetes"(99);Gemmatimonadetes(99);Gemmatimonadales(99);Gemmatimonadaceae(99);Gemmatimonas(99);
Otu01612	92	Bacteria(100);"Proteobacteria"(100);Gammaproteobacteria(100);unclassified(100);unclassified(100);unclassified(100);
Otu01613	92	Bacteria(100);"Acidobacteria"(100);Acidobacteria_Gp1(100);Acidobacteria_Gp1_order_incertae_sedis(100);Acidobacteria_Gp1_family_incertae_sedis(100);Gp1(100);
Otu01614	92	Bacteria(100);unclassified(100);unclassified(100);unclassified(100);unclassified(100);unclassified(100);
Otu01615	92	Bacteria(100);unclassified(100);unclassified(100);unclassified(100);unclassified(100);unclassified(100);
Otu01616	92	Bacteria(100);"Planctomycetes"(100);"Planctomycetacia"(100);Planctomycetales(100);Planctomycetaceae(100);unclassified(100);
Otu01617	92	Bacteria(100);"Bacteroidetes"(100);"Sphingobacteria"(100);"Sphingobacteriales"(100);Chitinophagaceae(100);unclassified(100);
Otu01618	92	Bacteria(100);unclassified(100);unclassified(100);unclassified(100);unclassified(100);unclassified(100);
Otu01619	92	Bacteria(100);"Bacteroidetes"(100);"Sphingobacteria"(100);"Sphingobacteriales"(100);Cytophagaceae(100);Dyadobacter(100);
Otu01620	92	Bacteria(100);"Planctomycetes"(100);"Planctomycetacia"(100);Planctomycetales(100);Planctomycetaceae(100);unclassified(100);
Otu01621	92	Bacteria(100);"Proteobacteria"(97);Alphaproteobacteria(97);unclassified(97);unclassified(97);unclassified(97);
Otu01622	91	Bacteria(100);"Chloroflexi"(100);Anaerolineae(100);Anaerolineales(100);Anaerolineaceae(100);unclassified(62);
Otu01623	91	Bacteria(100);"Proteobacteria"(100);Alphaproteobacteria(100);Sphingomonadales(100);Sphingomonadaceae(100);Sphingomonas(81);
Otu01624	91	Bacteria(100);"Proteobacteria"(100);Alphaproteobacteria(100);Caulobacterales(100);Caulobacteraceae(100);Phenylobacterium(84);
Otu01625	91	Bacteria(100);unclassified(100);unclassified(100);unclassified(100);unclassified(100);unclassified(100);
Otu01626	91	Bacteria(100);"Chloroflexi"(100);unclassified(100);unclassified(100);unclassified(100);unclassified(100);
Otu01627	91	Bacteria(100);unclassified(100);unclassified(100);unclassified(100);unclassified(100);unclassified(100);
Otu01628	90	Bacteria(100);"Acidobacteria"(100);Acidobacteria_Gp4(100);Acidobacteria_Gp4_order_incertae_sedis(100);Acidobacteria_Gp4_family_incertae_sedis(100);Gp4(100);
Otu01629	90	Bacteria(100);"Proteobacteria"(100);Deltaproteobacteria(100);Myxococcales(100);unclassified(98);unclassified(98);
Otu01630	90	Bacteria(100);"Chloroflexi"(100);unclassified(100);unclassified(100);unclassified(100);unclassified(100);
Otu01631	90	Bacteria(100);"Proteobacteria"(100);Betaproteobacteria(100);unclassified(100);unclassified(100);unclassified(100);
Otu01632	90	Bacteria(100);"Proteobacteria"(100);Alphaproteobacteria(100);unclassified(100);unclassified(100);unclassified(100);
Otu01633	90	Bacteria(100);"Bacteroidetes"(100);"Sphingobacteria"(100);"Sphingobacteriales"(100);Chitinophagaceae(100);unclassified(100);
Otu01634	90	Bacteria(100);Firmicutes(100);Clostridia(100);Clostridiales(100);Peptococcaceae_1(100);Desulfosporosinus(100);
Otu01635	90	Bacteria(100);unclassified(100);unclassified(100);unclassified(100);unclassified(100);unclassified(100);
Otu01636	90	Bacteria(100);unclassified(100);unclassified(100);unclassified(100);unclassified(100);unclassified(100);
Otu01637	90	Bacteria(100);"Actinobacteria"(100);Actinobacteria(100);Actinomycetales(100);unclassified(100);unclassified(100);
Otu01638	89	Bacteria(100);"Planctomycetes"(100);"Planctomycetacia"(100);Planctomycetales(100);Planctomycetaceae(100);unclassified(100);
Otu01639	89	Bacteria(100);"Planctomycetes"(100);"Planctomycetacia"(100);Planctomycetales(100);Planctomycetaceae(100);unclassified(100);
Otu01640	89	Bacteria(100);"Planctomycetes"(100);"Planctomycetacia"(100);Planctomycetales(100);Planctomycetaceae(100);Zavarzinella(79);
Otu01641	89	Bacteria(100);unclassified(66);unclassified(66);unclassified(66);unclassified(66);unclassified(66);
Otu01642	89	Bacteria(100);"Bacteroidetes"(100);"Sphingobacteria"(100);"Sphingobacteriales"(100);Sphingobacteriaceae(100);Solitalea(100);
Otu01643	89	Bacteria(100);"Acidobacteria"(100);Acidobacteria_Gp3(100);Acidobacteria_Gp3_order_incertae_sedis(100);Acidobacteria_Gp3_family_incertae_sedis(100);Gp3(100);
Otu01644	89	Bacteria(100);"Verrucomicrobia"(100);Opitutae(100);Opitutales(100);Opitutaceae(100);Opitutus(100);
Otu01645	89	Bacteria(100);"Verrucomicrobia"(100);Subdivision3(100);Subdivision3_order_incertae_sedis(100);Subdivision3_family_incertae_sedis(100);3_genus_incertae_sedis(100);
Otu01646	89	Bacteria(100);Firmicutes(100);Bacilli(100);Bacillales(100);Bacillaceae_1(99);unclassified(99);
Otu01647	89	Bacteria(100);"Proteobacteria"(100);Gammaproteobacteria(100);Legionellales(100);Coxiellaceae(100);Aquicella(100);
Otu01648	89	Bacteria(100);"Acidobacteria"(100);unclassified(97);unclassified(97);unclassified(97);unclassified(97);
Otu01649	89	Bacteria(100);"Proteobacteria"(100);Alphaproteobacteria(100);Rhizobiales(100);Hyphomicrobiaceae(100);Rhodomicrobium(100);
Otu01650	89	Bacteria(100);"Planctomycetes"(100);"Planctomycetacia"(100);Planctomycetales(100);Planctomycetaceae(100);unclassified(97);
Otu01651	89	Bacteria(100);unclassified(100);unclassified(100);unclassified(100);unclassified(100);unclassified(100);
Otu01652	89	Bacteria(100);"Proteobacteria"(100);Betaproteobacteria(100);unclassified(100);unclassified(100);unclassified(100);
Otu01653	89	Bacteria(100);unclassified(100);unclassified(100);unclassified(100);unclassified(100);unclassified(100);
Otu01654	89	Bacteria(100);unclassified(100);unclassified(100);unclassified(100);unclassified(100);unclassified(100);
Otu01655	89	Bacteria(100);unclassified(100);unclassified(100);unclassified(100);unclassified(100);unclassified(100);
Otu01656	89	Bacteria(100);"Gemmatimonadetes"(72);Gemmatimonadetes(72);Gemmatimonadales(72);Gemmatimonadaceae(72);Gemmatimonas(72);
Otu01657	88	Bacteria(100);"Bacteroidetes"(100);unclassified(100);unclassified(100);unclassified(100);unclassified(100);
Otu01658	88	Bacteria(100);unclassified(100);unclassified(100);unclassified(100);unclassified(100);unclassified(100);
Otu01659	88	Bacteria(100);"Acidobacteria"(74);Acidobacteria_Gp16(74);Acidobacteria_Gp16_order_incertae_sedis(74);Acidobacteria_Gp16_family_incertae_sedis(74);Gp16(74);
Otu01660	88	Bacteria(100);"Planctomycetes"(100);"Planctomycetacia"(100);Planctomycetales(100);Planctomycetaceae(100);unclassified(97);
Otu01661	88	Bacteria(100);"Proteobacteria"(100);Alphaproteobacteria(100);Rhodospirillales(100);Acetobacteraceae(100);unclassified(99);
Otu01662	88	Bacteria(100);"Planctomycetes"(100);"Planctomycetacia"(100);Planctomycetales(100);Planctomycetaceae(100);unclassified(100);
Otu01663	88	Bacteria(100);"Actinobacteria"(100);Actinobacteria(100);Solirubrobacterales(100);unclassified(70);unclassified(70);
Otu01664	88	Bacteria(100);"Actinobacteria"(100);Actinobacteria(100);Solirubrobacterales(100);Conexibacteraceae(94);Conexibacter(94);
Otu01665	88	Bacteria(100);"Proteobacteria"(100);Gammaproteobacteria(100);Pseudomonadales(100);Pseudomonadales_incertae_sedis(100);Dasania(100);
Otu01666	88	Bacteria(100);unclassified(100);unclassified(100);unclassified(100);unclassified(100);unclassified(100);
Otu01667	88	Bacteria(100);"Acidobacteria"(100);Acidobacteria_Gp17(100);Acidobacteria_Gp17_order_incertae_sedis(100);Acidobacteria_Gp17_family_incertae_sedis(100);Gp17(100);
Otu01668	87	Bacteria(100);unclassified(76);unclassified(76);unclassified(76);unclassified(76);unclassified(76);
Otu01669	87	Bacteria(100);"Bacteroidetes"(100);"Sphingobacteria"(100);"Sphingobacteriales"(100);unclassified(100);unclassified(100);
Otu01670	87	Bacteria(100);"Proteobacteria"(100);Deltaproteobacteria(97);Myxococcales(97);unclassified(69);unclassified(69);
Otu01671	87	Bacteria(100);unclassified(88);unclassified(88);unclassified(88);unclassified(88);unclassified(88);
Otu01672	87	Bacteria(100);unclassified(100);unclassified(100);unclassified(100);unclassified(100);unclassified(100);
Otu01673	87	Bacteria(100);unclassified(100);unclassified(100);unclassified(100);unclassified(100);unclassified(100);
Otu01674	87	Bacteria(100);unclassified(100);unclassified(100);unclassified(100);unclassified(100);unclassified(100);
Otu01675	87	Bacteria(100);"Proteobacteria"(100);Deltaproteobacteria(100);Myxococcales(100);Polyangiaceae(100);Chondromyces(100);
Otu01676	86	Bacteria(100);"Bacteroidetes"(100);Flavobacteria(100);"Flavobacteriales"(100);Flavobacteriaceae(100);Aequorivita(100);
Otu01677	86	Bacteria(100);"Proteobacteria"(100);Alphaproteobacteria(100);Alphaproteobacteria_order_incertae_sedis(98);Alphaproteobacteria_family_incertae_sedis(98);Rhizomicrobium(98);
Otu01678	86	Bacteria(100);unclassified(100);unclassified(100);unclassified(100);unclassified(100);unclassified(100);
Otu01679	86	Bacteria(100);"Bacteroidetes"(100);"Sphingobacteria"(100);"Sphingobacteriales"(100);Chitinophagaceae(100);unclassified(100);
Otu01680	86	Bacteria(100);unclassified(100);unclassified(100);unclassified(100);unclassified(100);unclassified(100);
Otu01681	86	Bacteria(100);"Chloroflexi"(96);unclassified(96);unclassified(96);unclassified(96);unclassified(96);
Otu01682	86	Bacteria(100);"Proteobacteria"(100);Gammaproteobacteria(100);Pseudomonadales(100);Moraxellaceae(100);Acinetobacter(100);
Otu01683	86	Bacteria(100);"Proteobacteria"(100);Deltaproteobacteria(98);unclassified(98);unclassified(98);unclassified(98);
Otu01684	86	Bacteria(100);"Acidobacteria"(100);Acidobacteria_Gp5(100);Acidobacteria_Gp5_order_incertae_sedis(100);Acidobacteria_Gp5_family_incertae_sedis(100);Gp5(100);
Otu01685	86	Bacteria(100);unclassified(100);unclassified(100);unclassified(100);unclassified(100);unclassified(100);
Otu01686	86	Bacteria(100);unclassified(98);unclassified(98);unclassified(98);unclassified(98);unclassified(98);
Otu01687	86	Bacteria(100);"Proteobacteria"(100);Alphaproteobacteria(100);unclassified(100);unclassified(100);unclassified(100);
Otu01688	86	Bacteria(100);"Actinobacteria"(100);Actinobacteria(100);Actinomycetales(100);unclassified(100);unclassified(100);
Otu01689	86	Bacteria(100);"Bacteroidetes"(100);Flavobacteria(85);"Flavobacteriales"(85);unclassified(85);unclassified(85);
Otu01690	86	Bacteria(100);"Proteobacteria"(100);Deltaproteobacteria(100);unclassified(100);unclassified(100);unclassified(100);
Otu01691	85	Bacteria(100);"Planctomycetes"(100);"Planctomycetacia"(100);Planctomycetales(100);Planctomycetaceae(100);unclassified(100);
Otu01692	85	Bacteria(100);"Acidobacteria"(100);Acidobacteria_Gp17(100);Acidobacteria_Gp17_order_incertae_sedis(100);Acidobacteria_Gp17_family_incertae_sedis(100);Gp17(100);
Otu01693	85	Bacteria(100);"Bacteroidetes"(100);"Sphingobacteria"(100);"Sphingobacteriales"(100);Chitinophagaceae(100);unclassified(97);
Otu01694	85	Bacteria(100);"Proteobacteria"(100);Alphaproteobacteria(100);unclassified(100);unclassified(100);unclassified(100);
Otu01695	85	Bacteria(100);"Verrucomicrobia"(100);Subdivision3(100);Subdivision3_order_incertae_sedis(100);Subdivision3_family_incertae_sedis(100);3_genus_incertae_sedis(100);
Otu01696	85	Bacteria(100);unclassified(100);unclassified(100);unclassified(100);unclassified(100);unclassified(100);
Otu01697	85	Bacteria(100);"Verrucomicrobia"(100);Subdivision3(100);Subdivision3_order_incertae_sedis(100);Subdivision3_family_incertae_sedis(100);3_genus_incertae_sedis(100);
Otu01698	85	Bacteria(100);"Chlamydiae"(100);Chlamydiae(100);Chlamydiales(100);Parachlamydiaceae(100);Parachlamydia(56);
Otu01699	85	Bacteria(100);"Gemmatimonadetes"(100);Gemmatimonadetes(100);Gemmatimonadales(100);Gemmatimonadaceae(100);Gemmatimonas(100);
Otu01700	85	Bacteria(100);"Proteobacteria"(100);Gammaproteobacteria(100);unclassified(100);unclassified(100);unclassified(100);
Otu01701	85	Bacteria(100);"Planctomycetes"(100);"Planctomycetacia"(100);Planctomycetales(100);Planctomycetaceae(100);Planctomyces(100);
Otu01702	85	Bacteria(100);"Planctomycetes"(100);"Planctomycetacia"(100);Planctomycetales(100);Planctomycetaceae(100);Gemmata(100);
Otu01703	85	Bacteria(100);"Armatimonadetes"(100);Armatimonadia(100);Armatimonadales(100);Armatimonadaceae(100);Armatimonas_Armatimonadetes_gp1(100);
Otu01704	85	Bacteria(100);unclassified(95);unclassified(95);unclassified(95);unclassified(95);unclassified(95);
Otu01705	85	Bacteria(100);unclassified(61);unclassified(61);unclassified(61);unclassified(61);unclassified(61);
Otu01706	84	Bacteria(100);"Planctomycetes"(74);"Planctomycetacia"(74);Planctomycetales(74);Planctomycetaceae(74);unclassified(70);
Otu01707	84	Bacteria(100);"Proteobacteria"(100);Deltaproteobacteria(100);Myxococcales(99);unclassified(99);unclassified(99);
Otu01708	84	Bacteria(100);"Planctomycetes"(100);"Planctomycetacia"(100);Planctomycetales(100);Planctomycetaceae(100);Blastopirellula(100);
Otu01709	84	Bacteria(100);"Verrucomicrobia"(100);unclassified(71);unclassified(71);unclassified(71);unclassified(71);
Otu01710	84	Bacteria(100);"Chloroflexi"(100);Anaerolineae(100);Anaerolineales(100);Anaerolineaceae(100);unclassified(100);
Otu01711	84	Bacteria(100);"Planctomycetes"(100);"Planctomycetacia"(100);Planctomycetales(100);Planctomycetaceae(100);Zavarzinella(55);
Otu01712	84	Bacteria(100);"Proteobacteria"(100);unclassified(100);unclassified(100);unclassified(100);unclassified(100);
Otu01713	84	Bacteria(100);"Verrucomicrobia"(100);Verrucomicrobiae(100);Verrucomicrobiales(100);Verrucomicrobiaceae(100);Prosthecobacter(100);
Otu01714	84	Bacteria(100);"Bacteroidetes"(100);"Sphingobacteria"(100);"Sphingobacteriales"(100);Chitinophagaceae(100);unclassified(100);
Otu01715	84	Bacteria(100);"Planctomycetes"(100);"Planctomycetacia"(100);Planctomycetales(100);Planctomycetaceae(100);unclassified(100);
Otu01716	84	Bacteria(100);unclassified(100);unclassified(100);unclassified(100);unclassified(100);unclassified(100);
Otu01717	83	Bacteria(100);"Proteobacteria"(100);Deltaproteobacteria(100);Myxococcales(100);Polyangiaceae(100);unclassified(100);
Otu01718	83	Bacteria(100);"Planctomycetes"(100);"Planctomycetacia"(100);Planctomycetales(100);Planctomycetaceae(100);unclassified(87);
Otu01719	83	Bacteria(100);unclassified(100);unclassified(100);unclassified(100);unclassified(100);unclassified(100);
Otu01720	83	Bacteria(100);"Proteobacteria"(100);Gammaproteobacteria(100);Xanthomonadales(100);Xanthomonadaceae(100);Dokdonella(100);
Otu01721	83	Bacteria(100);unclassified(100);unclassified(100);unclassified(100);unclassified(100);unclassified(100);
Otu01722	83	Bacteria(100);"Proteobacteria"(84);unclassified(84);unclassified(84);unclassified(84);unclassified(84);
Otu01723	83	Bacteria(100);unclassified(96);unclassified(96);unclassified(96);unclassified(96);unclassified(96);
Otu01724	83	Bacteria(100);"Proteobacteria"(100);Alphaproteobacteria(100);Rhodospirillales(100);Rhodospirillaceae(99);unclassified(99);
Otu01725	83	Bacteria(100);"Planctomycetes"(100);"Planctomycetacia"(100);Planctomycetales(100);Planctomycetaceae(100);Zavarzinella(100);
Otu01726	83	Bacteria(100);unclassified(100);unclassified(100);unclassified(100);unclassified(100);unclassified(100);
Otu01727	83	Bacteria(100);"Proteobacteria"(100);Gammaproteobacteria(100);unclassified(100);unclassified(100);unclassified(100);
Otu01728	83	Bacteria(100);"Actinobacteria"(100);Actinobacteria(100);Acidimicrobiales(93);unclassified(93);unclassified(93);
Otu01729	83	Bacteria(100);"Proteobacteria"(100);Betaproteobacteria(100);unclassified(57);unclassified(57);unclassified(57);
Otu01730	83	Bacteria(100);unclassified(100);unclassified(100);unclassified(100);unclassified(100);unclassified(100);
Otu01731	83	Bacteria(100);"Gemmatimonadetes"(100);Gemmatimonadetes(100);Gemmatimonadales(100);Gemmatimonadaceae(100);Gemmatimonas(100);
Otu01732	83	Bacteria(100);"Chloroflexi"(96);unclassified(96);unclassified(96);unclassified(96);unclassified(96);
Otu01733	82	Bacteria(100);"Bacteroidetes"(100);"Sphingobacteria"(100);"Sphingobacteriales"(100);Chitinophagaceae(100);unclassified(100);
Otu01734	82	Bacteria(100);"Actinobacteria"(100);Actinobacteria(100);Acidimicrobiales(100);unclassified(72);unclassified(72);
Otu01735	82	Bacteria(100);"Proteobacteria"(100);Deltaproteobacteria(100);Myxococcales(88);unclassified(88);unclassified(88);
Otu01736	82	Bacteria(100);"Planctomycetes"(96);"Planctomycetacia"(96);Planctomycetales(96);Planctomycetaceae(96);unclassified(92);
Otu01737	82	Bacteria(100);"Planctomycetes"(100);"Planctomycetacia"(100);Planctomycetales(100);Planctomycetaceae(100);Zavarzinella(100);
Otu01738	82	Bacteria(100);"Planctomycetes"(100);"Planctomycetacia"(100);Planctomycetales(100);Planctomycetaceae(100);unclassified(100);
Otu01739	82	Bacteria(100);"Proteobacteria"(100);Deltaproteobacteria(100);Myxococcales(100);unclassified(59);unclassified(59);
Otu01740	82	Bacteria(100);unclassified(100);unclassified(100);unclassified(100);unclassified(100);unclassified(100);
Otu01741	82	Bacteria(100);"Planctomycetes"(100);"Planctomycetacia"(100);Planctomycetales(100);Planctomycetaceae(100);unclassified(79);
Otu01742	82	Bacteria(100);"Bacteroidetes"(100);Flavobacteria(100);"Flavobacteriales"(100);Flavobacteriaceae(100);Flavobacterium(100);
Otu01743	82	Bacteria(100);unclassified(100);unclassified(100);unclassified(100);unclassified(100);unclassified(100);
Otu01744	82	Bacteria(100);"Proteobacteria"(100);Alphaproteobacteria(100);Rhizobiales(100);unclassified(83);unclassified(83);
Otu01745	82	Bacteria(100);"Bacteroidetes"(100);"Sphingobacteria"(100);"Sphingobacteriales"(100);Chitinophagaceae(100);unclassified(100);
Otu01746	82	Bacteria(100);unclassified(100);unclassified(100);unclassified(100);unclassified(100);unclassified(100);
Otu01747	82	Bacteria(100);"Proteobacteria"(100);Deltaproteobacteria(98);unclassified(98);unclassified(98);unclassified(98);
Otu01748	82	Bacteria(100);unclassified(100);unclassified(100);unclassified(100);unclassified(100);unclassified(100);
Otu01749	82	Bacteria(100);"Proteobacteria"(100);Deltaproteobacteria(100);Myxococcales(100);unclassified(100);unclassified(100);
Otu01750	81	Bacteria(100);"Proteobacteria"(100);Deltaproteobacteria(100);Myxococcales(100);Polyangiaceae(52);unclassified(100);
Otu01751	81	Bacteria(100);unclassified(100);unclassified(100);unclassified(100);unclassified(100);unclassified(100);
Otu01752	81	Bacteria(100);"Proteobacteria"(100);Gammaproteobacteria(100);unclassified(99);unclassified(99);unclassified(99);
Otu01753	81	Bacteria(100);unclassified(100);unclassified(100);unclassified(100);unclassified(100);unclassified(100);
Otu01754	81	Bacteria(100);unclassified(100);unclassified(100);unclassified(100);unclassified(100);unclassified(100);
Otu01755	81	Bacteria(100);unclassified(100);unclassified(100);unclassified(100);unclassified(100);unclassified(100);
Otu01756	81	Bacteria(100);"Verrucomicrobia"(100);Verrucomicrobiae(100);Verrucomicrobiales(100);Verrucomicrobiaceae(100);Verrucomicrobium(100);
Otu01757	81	Bacteria(100);Firmicutes(100);Bacilli(100);Bacillales(100);unclassified(99);unclassified(99);
Otu01758	81	Bacteria(100);unclassified(100);unclassified(100);unclassified(100);unclassified(100);unclassified(100);
Otu01759	81	Bacteria(100);unclassified(99);unclassified(99);unclassified(99);unclassified(99);unclassified(99);
Otu01760	81	Bacteria(100);"Proteobacteria"(100);Gammaproteobacteria(100);unclassified(100);unclassified(100);unclassified(100);
Otu01761	81	Bacteria(100);"Acidobacteria"(100);Acidobacteria_Gp1(100);Acidobacteria_Gp1_order_incertae_sedis(100);Acidobacteria_Gp1_family_incertae_sedis(100);Gp1(100);
Otu01762	81	Bacteria(100);"Verrucomicrobia"(100);Subdivision3(100);Subdivision3_order_incertae_sedis(100);Subdivision3_family_incertae_sedis(100);3_genus_incertae_sedis(100);
Otu01763	81	Bacteria(100);"Actinobacteria"(100);Actinobacteria(100);Actinomycetales(100);Demequinaceae(100);Demequina(100);
Otu01764	81	Bacteria(100);"Proteobacteria"(100);Gammaproteobacteria(100);unclassified(73);unclassified(73);unclassified(73);
Otu01765	81	Bacteria(100);"Gemmatimonadetes"(100);Gemmatimonadetes(100);Gemmatimonadales(100);Gemmatimonadaceae(100);Gemmatimonas(100);
Otu01766	81	Bacteria(100);unclassified(100);unclassified(100);unclassified(100);unclassified(100);unclassified(100);
Otu01767	81	Bacteria(100);"Planctomycetes"(100);"Planctomycetacia"(100);Planctomycetales(100);Planctomycetaceae(100);Zavarzinella(81);
Otu01768	80	Bacteria(100);Firmicutes(100);Clostridia(100);Clostridiales(100);Lachnospiraceae(100);Clostridium_XlVa(100);
Otu01769	80	Bacteria(100);"Acidobacteria"(100);Acidobacteria_Gp1(100);Acidobacteria_Gp1_order_incertae_sedis(100);Acidobacteria_Gp1_family_incertae_sedis(100);Gp1(100);
Otu01770	80	Bacteria(100);"Planctomycetes"(100);"Planctomycetacia"(100);Planctomycetales(100);Planctomycetaceae(100);Planctomyces(100);
Otu01771	80	Bacteria(100);"Verrucomicrobia"(94);Subdivision3(54);Subdivision3_order_incertae_sedis(54);Subdivision3_family_incertae_sedis(54);3_genus_incertae_sedis(54);
Otu01772	80	Bacteria(100);"Proteobacteria"(100);Alphaproteobacteria(100);Rhizobiales(100);Hyphomicrobiaceae(98);unclassified(98);
Otu01773	80	Bacteria(100);"Acidobacteria"(100);Acidobacteria_Gp6(100);Acidobacteria_Gp6_order_incertae_sedis(100);Acidobacteria_Gp6_family_incertae_sedis(100);Gp6(100);
Otu01774	80	Bacteria(100);unclassified(100);unclassified(100);unclassified(100);unclassified(100);unclassified(100);
Otu01775	80	Bacteria(100);"Verrucomicrobia"(100);Subdivision3(100);Subdivision3_order_incertae_sedis(100);Subdivision3_family_incertae_sedis(100);3_genus_incertae_sedis(100);
Otu01776	80	Bacteria(100);"Actinobacteria"(100);Actinobacteria(100);Solirubrobacterales(97);unclassified(83);unclassified(83);
Otu01777	80	Bacteria(100);"Acidobacteria"(100);Acidobacteria_Gp4(100);Acidobacteria_Gp4_order_incertae_sedis(100);Acidobacteria_Gp4_family_incertae_sedis(100);Gp4(100);
Otu01778	80	Bacteria(100);unclassified(100);unclassified(100);unclassified(100);unclassified(100);unclassified(100);
Otu01779	80	Bacteria(100);unclassified(100);unclassified(100);unclassified(100);unclassified(100);unclassified(100);
Otu01780	80	Bacteria(100);"Actinobacteria"(100);Actinobacteria(100);Acidimicrobiales(95);unclassified(95);unclassified(95);
Otu01781	80	Bacteria(100);"Proteobacteria"(100);unclassified(53);unclassified(53);unclassified(53);unclassified(53);
Otu01782	80	Bacteria(100);"Armatimonadetes"(100);Armatimonadetes_gp5_class_incertae_sedis(100);Armatimonadetes_gp5_order_incetae_sedis(100);Armatimonadetes_gp5_family_incetae_sedis(100);Armatimonadetes_gp5(100);
Otu01783	80	Bacteria(100);"Proteobacteria"(100);Deltaproteobacteria(100);unclassified(100);unclassified(100);unclassified(100);
Otu01784	80	Bacteria(100);unclassified(100);unclassified(100);unclassified(100);unclassified(100);unclassified(100);
Otu01785	79	Bacteria(100);"Bacteroidetes"(100);unclassified(100);unclassified(100);unclassified(100);unclassified(100);
Otu01786	79	Bacteria(100);"Proteobacteria"(100);Alphaproteobacteria(100);Rhizobiales(100);"Aurantimonadaceae"(100);Aurantimonas(100);
Otu01787	79	Bacteria(100);"Planctomycetes"(98);"Planctomycetacia"(98);Planctomycetales(98);Planctomycetaceae(98);unclassified(98);
Otu01788	79	Bacteria(100);unclassified(100);unclassified(100);unclassified(100);unclassified(100);unclassified(100);
Otu01789	79	Bacteria(100);"Actinobacteria"(100);Actinobacteria(100);Actinomycetales(100);Micromonosporaceae(100);Catelliglobosispora(94);
Otu01790	79	Bacteria(100);Firmicutes(100);Clostridia(100);Clostridiales(100);Lachnospiraceae(100);Clostridium_XlVa(93);
Otu01791	79	Bacteria(100);"Armatimonadetes"(100);Armatimonadetes_gp4_class_incertae_sedis(100);Armatimonadetes_gp4_order_incetae_sedis(100);Armatimonadetes_gp4_family_incetae_sedis(100);Armatimonadetes_gp4(100);
Otu01792	79	Bacteria(100);unclassified(54);unclassified(54);unclassified(54);unclassified(54);unclassified(54);
Otu01793	79	Bacteria(100);"Proteobacteria"(100);unclassified(100);unclassified(100);unclassified(100);unclassified(100);
Otu01794	79	Bacteria(100);"Bacteroidetes"(100);Flavobacteria(100);"Flavobacteriales"(100);Flavobacteriaceae(100);Flavobacterium(100);
Otu01795	79	Bacteria(100);"Proteobacteria"(100);Gammaproteobacteria(100);Xanthomonadales(97);Sinobacteraceae(97);Steroidobacter(97);
Otu01796	79	Bacteria(100);"Verrucomicrobia"(100);Subdivision3(100);Subdivision3_order_incertae_sedis(100);Subdivision3_family_incertae_sedis(100);3_genus_incertae_sedis(100);
Otu01797	79	Bacteria(100);"Chloroflexi"(100);unclassified(100);unclassified(100);unclassified(100);unclassified(100);
Otu01798	78	Bacteria(100);"Proteobacteria"(100);Alphaproteobacteria(100);Rhizobiales(100);Rhodobiaceae(100);Parvibaculum(100);
Otu01799	78	Bacteria(100);"Proteobacteria"(100);Alphaproteobacteria(100);Rhizobiales(100);Hyphomicrobiaceae(71);Blastochloris(71);
Otu01800	78	Bacteria(100);"Proteobacteria"(100);Gammaproteobacteria(100);unclassified(100);unclassified(100);unclassified(100);
Otu01801	78	Bacteria(100);"Acidobacteria"(100);Acidobacteria_Gp4(100);Acidobacteria_Gp4_order_incertae_sedis(100);Acidobacteria_Gp4_family_incertae_sedis(100);Gp4(100);
Otu01802	78	Bacteria(100);unclassified(100);unclassified(100);unclassified(100);unclassified(100);unclassified(100);
Otu01803	78	Bacteria(100);unclassified(74);unclassified(74);unclassified(74);unclassified(74);unclassified(74);
Otu01804	78	Bacteria(100);"Proteobacteria"(100);Alphaproteobacteria(100);Rhodospirillales(100);Acetobacteraceae(100);Acidisoma(59);
Otu01805	78	Bacteria(100);"Proteobacteria"(100);Alphaproteobacteria(100);Rhizobiales(100);Bradyrhizobiaceae(98);unclassified(98);
Otu01806	78	Bacteria(100);unclassified(83);unclassified(83);unclassified(83);unclassified(83);unclassified(83);
Otu01807	78	Bacteria(100);unclassified(92);unclassified(92);unclassified(92);unclassified(92);unclassified(92);
Otu01808	77	Bacteria(100);unclassified(97);unclassified(97);unclassified(97);unclassified(97);unclassified(97);
Otu01809	77	Bacteria(100);Firmicutes(100);Bacilli(100);Bacillales(100);unclassified(100);unclassified(100);
Otu01810	77	Bacteria(100);"Proteobacteria"(100);Deltaproteobacteria(100);Myxococcales(100);unclassified(100);unclassified(100);
Otu01811	77	Bacteria(100);unclassified(100);unclassified(100);unclassified(100);unclassified(100);unclassified(100);
Otu01812	77	Bacteria(100);unclassified(100);unclassified(100);unclassified(100);unclassified(100);unclassified(100);
Otu01813	77	Bacteria(100);unclassified(100);unclassified(100);unclassified(100);unclassified(100);unclassified(100);
Otu01814	77	Bacteria(100);"Actinobacteria"(100);Actinobacteria(100);Actinomycetales(100);Nocardioidaceae(100);Nocardioides(100);
Otu01815	77	Bacteria(100);"Gemmatimonadetes"(100);Gemmatimonadetes(100);Gemmatimonadales(100);Gemmatimonadaceae(100);Gemmatimonas(100);
Otu01816	77	Bacteria(100);"Proteobacteria"(100);Alphaproteobacteria(100);Rhodospirillales(100);Rhodospirillaceae(100);unclassified(100);
Otu01817	77	Bacteria(100);"Proteobacteria"(100);Alphaproteobacteria(100);unclassified(100);unclassified(100);unclassified(100);
Otu01818	77	Bacteria(100);"Planctomycetes"(100);"Planctomycetacia"(100);Planctomycetales(100);Planctomycetaceae(100);unclassified(84);
Otu01819	77	Bacteria(100);unclassified(100);unclassified(100);unclassified(100);unclassified(100);unclassified(100);
Otu01820	77	Bacteria(100);"Planctomycetes"(100);"Planctomycetacia"(100);Planctomycetales(100);Planctomycetaceae(100);unclassified(100);
Otu01821	77	Bacteria(100);"Chloroflexi"(100);Caldilineae(97);Caldilineales(97);Caldilineaceae(97);Caldilinea(97);
Otu01822	77	Bacteria(100);unclassified(100);unclassified(100);unclassified(100);unclassified(100);unclassified(100);
Otu01823	77	Bacteria(100);unclassified(100);unclassified(100);unclassified(100);unclassified(100);unclassified(100);
Otu01824	77	Bacteria(100);"Proteobacteria"(100);Deltaproteobacteria(100);Myxococcales(100);Polyangiaceae(100);unclassified(100);
Otu01825	76	Bacteria(100);"Proteobacteria"(100);Alphaproteobacteria(100);Rhodospirillales(82);unclassified(82);unclassified(82);
Otu01826	76	Bacteria(100);"Acidobacteria"(100);Acidobacteria_Gp10(100);Acidobacteria_Gp10_order_incertae_sedis(100);Acidobacteria_Gp10_family_incertae_sedis(100);Gp10(100);
Otu01827	76	Bacteria(100);"Planctomycetes"(100);"Planctomycetacia"(100);Planctomycetales(100);Planctomycetaceae(100);Gemmata(93);
Otu01828	76	Bacteria(100);"Verrucomicrobia"(100);unclassified(100);unclassified(100);unclassified(100);unclassified(100);
Otu01829	76	Bacteria(100);unclassified(100);unclassified(100);unclassified(100);unclassified(100);unclassified(100);
Otu01830	76	Bacteria(100);unclassified(100);unclassified(100);unclassified(100);unclassified(100);unclassified(100);
Otu01831	76	Bacteria(100);"Proteobacteria"(100);Gammaproteobacteria(100);Gammaproteobacteria_order_incertae_sedis(94);Gammaproteobacteria_family_incertae_sedis(94);unclassified(94);
Otu01832	76	Bacteria(100);unclassified(93);unclassified(93);unclassified(93);unclassified(93);unclassified(93);
Otu01833	76	Bacteria(100);WS3(100);WS3_class_incertae_sedis(100);WS3_order_incertae_sedis(100);WS3_family_incertae_sedis(100);WS3_genus_incertae_sedis(100);
Otu01834	76	Bacteria(100);"Bacteroidetes"(100);Flavobacteria(100);"Flavobacteriales"(100);Cryomorphaceae(100);Cryomorpha(100);
Otu01835	76	Bacteria(100);unclassified(100);unclassified(100);unclassified(100);unclassified(100);unclassified(100);
Otu01836	76	Bacteria(100);"Acidobacteria"(100);Acidobacteria_Gp6(100);Acidobacteria_Gp6_order_incertae_sedis(100);Acidobacteria_Gp6_family_incertae_sedis(100);Gp6(100);
Otu01837	76	Bacteria(100);"Verrucomicrobia"(100);Opitutae(100);Opitutales(100);Opitutaceae(100);Opitutus(100);
Otu01838	76	Bacteria(100);unclassified(100);unclassified(100);unclassified(100);unclassified(100);unclassified(100);
Otu01839	75	Bacteria(100);"Gemmatimonadetes"(100);Gemmatimonadetes(100);Gemmatimonadales(100);Gemmatimonadaceae(100);Gemmatimonas(100);
Otu01841	75	Bacteria(100);"Proteobacteria"(100);Gammaproteobacteria(100);Xanthomonadales(100);Xanthomonadaceae(100);unclassified(91);
Otu01842	75	Bacteria(100);"Proteobacteria"(100);Gammaproteobacteria(100);unclassified(100);unclassified(100);unclassified(100);
Otu01843	75	Bacteria(100);"Actinobacteria"(100);Actinobacteria(100);Acidimicrobiales(86);unclassified(86);unclassified(86);
Otu01844	75	Bacteria(100);unclassified(100);unclassified(100);unclassified(100);unclassified(100);unclassified(100);
Otu01845	75	Bacteria(100);unclassified(100);unclassified(100);unclassified(100);unclassified(100);unclassified(100);
Otu01846	75	Bacteria(100);"Proteobacteria"(100);Gammaproteobacteria(100);Xanthomonadales(86);Sinobacteraceae(86);unclassified(66);
Otu01847	75	Bacteria(100);"Actinobacteria"(100);Actinobacteria(100);unclassified(91);unclassified(91);unclassified(91);
Otu01849	75	Bacteria(100);unclassified(100);unclassified(100);unclassified(100);unclassified(100);unclassified(100);
Otu01850	75	Bacteria(100);"Proteobacteria"(100);Alphaproteobacteria(100);unclassified(70);unclassified(70);unclassified(70);
Otu01851	75	Bacteria(100);"Planctomycetes"(96);"Planctomycetacia"(96);Planctomycetales(96);Planctomycetaceae(96);unclassified(96);
Otu01852	75	Bacteria(100);unclassified(100);unclassified(100);unclassified(100);unclassified(100);unclassified(100);
Otu01853	75	Bacteria(100);"Planctomycetes"(100);"Planctomycetacia"(100);Planctomycetales(100);Planctomycetaceae(100);unclassified(88);
Otu01854	74	Bacteria(100);"Bacteroidetes"(100);Flavobacteria(100);"Flavobacteriales"(100);Flavobacteriaceae(100);Flavobacterium(100);
Otu01855	74	Bacteria(100);"Planctomycetes"(100);"Planctomycetacia"(100);Planctomycetales(100);Planctomycetaceae(100);unclassified(100);
Otu01856	74	Bacteria(100);"Acidobacteria"(100);Acidobacteria_Gp3(100);Acidobacteria_Gp3_order_incertae_sedis(100);Acidobacteria_Gp3_family_incertae_sedis(100);Gp3(100);
Otu01857	74	Bacteria(100);"Proteobacteria"(100);Alphaproteobacteria(100);Rhizobiales(100);Hyphomicrobiaceae(100);unclassified(100);
Otu01858	74	Bacteria(100);"Proteobacteria"(100);Alphaproteobacteria(100);unclassified(100);unclassified(100);unclassified(100);
Otu01859	74	Bacteria(100);"Chlamydiae"(100);Chlamydiae(100);Chlamydiales(100);Simkaniaceae(96);Simkania(96);
Otu01860	74	Bacteria(100);"Acidobacteria"(88);Acidobacteria_Gp4(88);Acidobacteria_Gp4_order_incertae_sedis(88);Acidobacteria_Gp4_family_incertae_sedis(88);Gp4(88);
Otu01861	74	Bacteria(100);unclassified(100);unclassified(100);unclassified(100);unclassified(100);unclassified(100);
Otu01862	74	Bacteria(100);"Planctomycetes"(100);"Planctomycetacia"(100);Planctomycetales(100);Planctomycetaceae(100);unclassified(59);
Otu01863	74	Bacteria(100);unclassified(100);unclassified(100);unclassified(100);unclassified(100);unclassified(100);
Otu01864	74	Bacteria(100);"Planctomycetes"(100);"Planctomycetacia"(100);Planctomycetales(100);Planctomycetaceae(100);unclassified(100);
Otu01865	74	Bacteria(100);unclassified(100);unclassified(100);unclassified(100);unclassified(100);unclassified(100);
Otu01866	74	Bacteria(100);"Proteobacteria"(100);Deltaproteobacteria(100);unclassified(98);unclassified(98);unclassified(98);
Otu01867	74	Bacteria(100);"Bacteroidetes"(100);"Sphingobacteria"(100);"Sphingobacteriales"(100);unclassified(100);unclassified(100);
Otu01868	74	Bacteria(100);unclassified(100);unclassified(100);unclassified(100);unclassified(100);unclassified(100);
Otu01869	74	Bacteria(100);"Acidobacteria"(100);Acidobacteria_Gp17(100);Acidobacteria_Gp17_order_incertae_sedis(100);Acidobacteria_Gp17_family_incertae_sedis(100);Gp17(100);
Otu01870	73	Bacteria(100);"Proteobacteria"(100);Alphaproteobacteria(100);Rhizobiales(100);unclassified(79);unclassified(79);
Otu01871	73	Bacteria(100);"Acidobacteria"(100);Acidobacteria_Gp4(100);Acidobacteria_Gp4_order_incertae_sedis(100);Acidobacteria_Gp4_family_incertae_sedis(100);Gp4(100);
Otu01872	73	Bacteria(100);"Planctomycetes"(100);"Planctomycetacia"(100);Planctomycetales(100);Planctomycetaceae(100);Singulisphaera(100);
Otu01873	73	Bacteria(100);Firmicutes(100);Clostridia(100);Clostridiales(100);Clostridiales_Incertae_Sedis_XI(100);Sedimentibacter(100);
Otu01874	73	Bacteria(100);"Verrucomicrobia"(100);Subdivision3(76);Subdivision3_order_incertae_sedis(76);Subdivision3_family_incertae_sedis(76);3_genus_incertae_sedis(76);
Otu01875	73	Bacteria(100);"Planctomycetes"(100);"Planctomycetacia"(100);Planctomycetales(100);Planctomycetaceae(100);unclassified(100);
Otu01876	73	Bacteria(100);"Proteobacteria"(100);Deltaproteobacteria(100);Myxococcales(100);unclassified(100);unclassified(100);
Otu01877	73	Bacteria(100);unclassified(99);unclassified(99);unclassified(99);unclassified(99);unclassified(99);
Otu01878	73	Bacteria(100);"Actinobacteria"(100);Actinobacteria(100);Solirubrobacterales(100);unclassified(96);unclassified(96);
Otu01879	73	Bacteria(100);unclassified(100);unclassified(100);unclassified(100);unclassified(100);unclassified(100);
Otu01880	73	Bacteria(100);"Acidobacteria"(100);Acidobacteria_Gp17(100);Acidobacteria_Gp17_order_incertae_sedis(100);Acidobacteria_Gp17_family_incertae_sedis(100);Gp17(100);
Otu01881	73	Bacteria(100);"Verrucomicrobia"(100);Spartobacteria(100);Spartobacteria_order_incertae_sedis(100);Spartobacteria_family_incertae_sedis(100);Spartobacteria_genera_incertae_sedis(100);
Otu01882	73	Bacteria(100);unclassified(100);unclassified(100);unclassified(100);unclassified(100);unclassified(100);
Otu01883	73	Bacteria(100);"Planctomycetes"(100);"Planctomycetacia"(100);Planctomycetales(100);Planctomycetaceae(100);unclassified(100);
Otu01884	73	Bacteria(100);Firmicutes(100);unclassified(100);unclassified(100);unclassified(100);unclassified(100);
Otu01885	72	Bacteria(100);"Proteobacteria"(100);Betaproteobacteria(100);unclassified(100);unclassified(100);unclassified(100);
Otu01886	72	Bacteria(100);unclassified(100);unclassified(100);unclassified(100);unclassified(100);unclassified(100);
Otu01887	72	Bacteria(100);"Proteobacteria"(100);Deltaproteobacteria(100);unclassified(96);unclassified(96);unclassified(96);
Otu01888	72	Bacteria(100);"Verrucomicrobia"(100);Verrucomicrobiae(100);Verrucomicrobiales(100);Verrucomicrobiaceae(100);unclassified(52);
Otu01889	72	Bacteria(100);"Bacteroidetes"(100);"Sphingobacteria"(100);"Sphingobacteriales"(100);unclassified(84);unclassified(84);
Otu01890	72	Bacteria(100);unclassified(85);unclassified(85);unclassified(85);unclassified(85);unclassified(85);
Otu01891	72	Bacteria(100);"Bacteroidetes"(100);"Sphingobacteria"(100);"Sphingobacteriales"(100);Chitinophagaceae(100);unclassified(100);
Otu01892	72	Bacteria(100);"Chlamydiae"(100);Chlamydiae(100);Chlamydiales(100);unclassified(100);unclassified(100);
Otu01893	72	Bacteria(100);unclassified(100);unclassified(100);unclassified(100);unclassified(100);unclassified(100);
Otu01894	72	Bacteria(100);"Actinobacteria"(100);Actinobacteria(100);unclassified(100);unclassified(100);unclassified(100);
Otu01895	72	Bacteria(100);"Planctomycetes"(100);"Planctomycetacia"(100);Planctomycetales(100);Planctomycetaceae(100);Singulisphaera(100);
Otu01896	72	Bacteria(100);"Acidobacteria"(100);Acidobacteria_Gp4(100);Acidobacteria_Gp4_order_incertae_sedis(100);Acidobacteria_Gp4_family_incertae_sedis(100);Gp4(100);
Otu01897	72	Bacteria(100);"Verrucomicrobia"(100);Subdivision3(100);Subdivision3_order_incertae_sedis(100);Subdivision3_family_incertae_sedis(100);3_genus_incertae_sedis(100);
Otu01898	72	Bacteria(100);"Proteobacteria"(100);unclassified(100);unclassified(100);unclassified(100);unclassified(100);
Otu01899	72	Bacteria(100);"Bacteroidetes"(100);Flavobacteria(100);"Flavobacteriales"(100);Cryomorphaceae(100);unclassified(100);
Otu01901	72	Bacteria(100);"Actinobacteria"(100);Actinobacteria(100);Acidimicrobiales(100);unclassified(89);unclassified(89);
Otu01902	72	Bacteria(100);unclassified(100);unclassified(100);unclassified(100);unclassified(100);unclassified(100);
Otu01903	72	Bacteria(100);"Verrucomicrobia"(100);Subdivision3(100);Subdivision3_order_incertae_sedis(100);Subdivision3_family_incertae_sedis(100);3_genus_incertae_sedis(100);
Otu01904	71	Bacteria(100);unclassified(100);unclassified(100);unclassified(100);unclassified(100);unclassified(100);
Otu01905	71	Bacteria(100);unclassified(100);unclassified(100);unclassified(100);unclassified(100);unclassified(100);
Otu01906	71	Bacteria(100);"Proteobacteria"(100);Betaproteobacteria(100);Rhodocyclales(100);Rhodocyclaceae(100);unclassified(100);
Otu01907	71	Bacteria(100);"Proteobacteria"(100);Betaproteobacteria(100);unclassified(100);unclassified(100);unclassified(100);
Otu01908	71	Bacteria(100);"Proteobacteria"(100);Gammaproteobacteria(100);unclassified(98);unclassified(98);unclassified(98);
Otu01909	71	Bacteria(100);"Proteobacteria"(100);Alphaproteobacteria(98);unclassified(98);unclassified(98);unclassified(98);
Otu01910	71	Bacteria(100);"Verrucomicrobia"(100);Verrucomicrobiae(100);Verrucomicrobiales(100);Verrucomicrobiaceae(100);unclassified(100);
Otu01911	71	Bacteria(100);Firmicutes(100);Erysipelotrichia(98);Erysipelotrichales(98);Erysipelotrichaceae(98);Turicibacter(98);
Otu01912	71	Bacteria(100);"Proteobacteria"(100);Gammaproteobacteria(100);unclassified(100);unclassified(100);unclassified(100);
Otu01913	71	Bacteria(100);"Armatimonadetes"(100);Armatimonadetes_gp4_class_incertae_sedis(100);Armatimonadetes_gp4_order_incetae_sedis(100);Armatimonadetes_gp4_family_incetae_sedis(100);Armatimonadetes_gp4(100);
Otu01914	70	Bacteria(100);"Proteobacteria"(76);unclassified(73);unclassified(73);unclassified(73);unclassified(73);
Otu01915	70	Bacteria(100);"Chloroflexi"(100);Caldilineae(100);Caldilineales(100);Caldilineaceae(100);Caldilinea(100);
Otu01916	70	Bacteria(100);unclassified(100);unclassified(100);unclassified(100);unclassified(100);unclassified(100);
Otu01917	70	Bacteria(100);"Bacteroidetes"(100);unclassified(100);unclassified(100);unclassified(100);unclassified(100);
Otu01918	70	Bacteria(100);"Proteobacteria"(100);Alphaproteobacteria(100);Rhodospirillales(100);Rhodospirillaceae(100);Dongia(100);
Otu01919	70	Bacteria(100);unclassified(100);unclassified(100);unclassified(100);unclassified(100);unclassified(100);
Otu01920	70	Bacteria(100);"Planctomycetes"(100);"Planctomycetacia"(100);Planctomycetales(100);Planctomycetaceae(100);unclassified(99);
Otu01921	70	Bacteria(100);"Bacteroidetes"(100);unclassified(100);unclassified(100);unclassified(100);unclassified(100);
Otu01922	70	Bacteria(100);"Planctomycetes"(100);"Planctomycetacia"(100);Planctomycetales(100);Planctomycetaceae(100);unclassified(66);
Otu01923	70	Bacteria(100);"Proteobacteria"(100);Deltaproteobacteria(100);Myxococcales(100);unclassified(100);unclassified(100);
Otu01924	70	Bacteria(100);"Proteobacteria"(100);Gammaproteobacteria(100);Legionellales(100);Legionellaceae(100);Legionella(100);
Otu01925	70	Bacteria(100);unclassified(100);unclassified(100);unclassified(100);unclassified(100);unclassified(100);
Otu01926	70	Bacteria(100);"Planctomycetes"(100);"Planctomycetacia"(100);Planctomycetales(100);Planctomycetaceae(100);unclassified(70);
Otu01927	70	Bacteria(100);unclassified(100);unclassified(100);unclassified(100);unclassified(100);unclassified(100);
Otu01928	70	Bacteria(100);unclassified(78);unclassified(78);unclassified(78);unclassified(78);unclassified(78);
Otu01929	70	Bacteria(100);"Proteobacteria"(100);unclassified(100);unclassified(100);unclassified(100);unclassified(100);
Otu01930	70	Bacteria(100);unclassified(100);unclassified(100);unclassified(100);unclassified(100);unclassified(100);
Otu01931	70	Bacteria(100);unclassified(100);unclassified(100);unclassified(100);unclassified(100);unclassified(100);
Otu01932	70	Bacteria(100);"Proteobacteria"(100);Alphaproteobacteria(100);Caulobacterales(100);Caulobacteraceae(100);Phenylobacterium(100);
Otu01933	70	Bacteria(100);"Actinobacteria"(100);Actinobacteria(100);unclassified(95);unclassified(95);unclassified(95);
Otu01934	70	Bacteria(100);unclassified(100);unclassified(100);unclassified(100);unclassified(100);unclassified(100);
Otu01935	70	Bacteria(100);unclassified(100);unclassified(100);unclassified(100);unclassified(100);unclassified(100);
Otu01936	70	Bacteria(100);"Proteobacteria"(100);Alphaproteobacteria(100);Rhizobiales(100);unclassified(100);unclassified(100);
Otu01937	69	Bacteria(100);"Proteobacteria"(100);Alphaproteobacteria(100);Rhizobiales(100);unclassified(98);unclassified(98);
Otu01938	69	Bacteria(100);Firmicutes(100);Clostridia(100);Clostridiales(100);Clostridiaceae_1(100);Clostridium_sensu_stricto(100);
Otu01939	69	Bacteria(100);Firmicutes(100);Bacilli(100);Bacillales(100);unclassified(93);unclassified(93);
Otu01940	69	Bacteria(100);"Bacteroidetes"(100);unclassified(100);unclassified(100);unclassified(100);unclassified(100);
Otu01941	69	Bacteria(100);"Actinobacteria"(100);Actinobacteria(100);Acidimicrobiales(100);unclassified(100);unclassified(100);
Otu01942	69	Bacteria(100);"Planctomycetes"(100);"Planctomycetacia"(100);Planctomycetales(100);Planctomycetaceae(100);unclassified(100);
Otu01943	69	Bacteria(100);"Acidobacteria"(100);Acidobacteria_Gp7(100);Acidobacteria_Gp7_order_incertae_sedis(100);Acidobacteria_Gp7_family_incertae_sedis(100);Gp7(100);
Otu01944	69	Bacteria(100);unclassified(100);unclassified(100);unclassified(100);unclassified(100);unclassified(100);
Otu01945	69	Bacteria(100);unclassified(100);unclassified(100);unclassified(100);unclassified(100);unclassified(100);
Otu01946	69	Bacteria(100);Firmicutes(100);Bacilli(100);Bacillales(100);unclassified(100);unclassified(100);
Otu01947	69	Bacteria(100);"Verrucomicrobia"(100);unclassified(73);unclassified(73);unclassified(73);unclassified(73);
Otu01948	69	Bacteria(100);"Proteobacteria"(100);Deltaproteobacteria(100);Bdellovibrionales(100);Bdellovibrionaceae(100);Vampirovibrio(100);
Otu01949	69	Bacteria(100);"Proteobacteria"(100);Gammaproteobacteria(100);unclassified(100);unclassified(100);unclassified(100);
Otu01950	69	Bacteria(100);"Gemmatimonadetes"(100);Gemmatimonadetes(100);Gemmatimonadales(100);Gemmatimonadaceae(100);Gemmatimonas(100);
Otu01951	69	Bacteria(100);"Verrucomicrobia"(100);Subdivision3(100);Subdivision3_order_incertae_sedis(100);Subdivision3_family_incertae_sedis(100);3_genus_incertae_sedis(100);
Otu01952	69	Bacteria(100);"Proteobacteria"(100);Alphaproteobacteria(100);Rhizobiales(100);Rhizobiales_incertae_sedis(100);Bauldia(82);
Otu01953	69	Bacteria(100);unclassified(100);unclassified(100);unclassified(100);unclassified(100);unclassified(100);
Otu01954	69	Bacteria(100);unclassified(100);unclassified(100);unclassified(100);unclassified(100);unclassified(100);
Otu01955	69	Bacteria(100);unclassified(100);unclassified(100);unclassified(100);unclassified(100);unclassified(100);
Otu01956	69	Bacteria(100);"Chlamydiae"(100);Chlamydiae(100);Chlamydiales(100);unclassified(100);unclassified(100);
Otu01957	69	Bacteria(100);unclassified(100);unclassified(100);unclassified(100);unclassified(100);unclassified(100);
Otu01958	68	Bacteria(100);"Proteobacteria"(100);Betaproteobacteria(100);Burkholderiales(100);unclassified(52);unclassified(52);
Otu01959	68	Bacteria(100);"Actinobacteria"(100);Actinobacteria(100);Acidimicrobiales(100);unclassified(100);unclassified(100);
Otu01960	68	Bacteria(100);"Acidobacteria"(100);Acidobacteria_Gp1(100);Acidobacteria_Gp1_order_incertae_sedis(100);Acidobacteria_Gp1_family_incertae_sedis(100);Gp1(100);
Otu01961	68	Bacteria(100);"Planctomycetes"(87);"Planctomycetacia"(87);Planctomycetales(87);Planctomycetaceae(87);unclassified(87);
Otu01962	68	Bacteria(100);unclassified(100);unclassified(100);unclassified(100);unclassified(100);unclassified(100);
Otu01963	68	Bacteria(100);unclassified(100);unclassified(100);unclassified(100);unclassified(100);unclassified(100);
Otu01964	68	Bacteria(100);"Proteobacteria"(100);Alphaproteobacteria(100);Sphingomonadales(100);Sphingomonadaceae(100);unclassified(75);
Otu01965	68	Bacteria(100);Firmicutes(100);Bacilli(100);Bacillales(100);Paenibacillaceae_1(100);Paenibacillus(90);
Otu01966	68	Bacteria(100);unclassified(100);unclassified(100);unclassified(100);unclassified(100);unclassified(100);
Otu01967	68	Bacteria(100);unclassified(100);unclassified(100);unclassified(100);unclassified(100);unclassified(100);
Otu01968	68	Bacteria(100);"Bacteroidetes"(100);"Sphingobacteria"(100);"Sphingobacteriales"(100);unclassified(95);unclassified(95);
Otu01969	68	Bacteria(100);unclassified(100);unclassified(100);unclassified(100);unclassified(100);unclassified(100);
Otu01970	68	Bacteria(100);unclassified(100);unclassified(100);unclassified(100);unclassified(100);unclassified(100);
Otu01971	68	Bacteria(100);"Verrucomicrobia"(100);Subdivision3(100);Subdivision3_order_incertae_sedis(100);Subdivision3_family_incertae_sedis(100);3_genus_incertae_sedis(100);
Otu01972	68	Bacteria(100);"Actinobacteria"(100);Actinobacteria(100);Acidimicrobiales(71);Acidimicrobiaceae(68);unclassified(68);
Otu01973	68	Bacteria(100);"Verrucomicrobia"(100);unclassified(100);unclassified(100);unclassified(100);unclassified(100);
Otu01974	68	Bacteria(100);"Proteobacteria"(100);Deltaproteobacteria(100);Myxococcales(100);unclassified(92);unclassified(92);
Otu01975	68	Bacteria(100);"Proteobacteria"(100);Betaproteobacteria(100);unclassified(100);unclassified(100);unclassified(100);
Otu01976	68	Bacteria(100);"Acidobacteria"(100);Acidobacteria_Gp6(100);Acidobacteria_Gp6_order_incertae_sedis(100);Acidobacteria_Gp6_family_incertae_sedis(100);Gp6(100);
Otu01977	68	Bacteria(100);unclassified(100);unclassified(100);unclassified(100);unclassified(100);unclassified(100);
Otu01978	68	Bacteria(100);unclassified(100);unclassified(100);unclassified(100);unclassified(100);unclassified(100);
Otu01979	68	Bacteria(100);"Planctomycetes"(71);"Planctomycetacia"(71);Planctomycetales(71);Planctomycetaceae(71);unclassified(71);
Otu01980	67	Bacteria(100);unclassified(100);unclassified(100);unclassified(100);unclassified(100);unclassified(100);
Otu01981	67	Bacteria(100);"Acidobacteria"(100);Acidobacteria_Gp17(100);Acidobacteria_Gp17_order_incertae_sedis(100);Acidobacteria_Gp17_family_incertae_sedis(100);Gp17(100);
Otu01982	67	Bacteria(100);"Proteobacteria"(100);Deltaproteobacteria(100);Myxococcales(100);Polyangiaceae(100);Chondromyces(77);
Otu01983	67	Bacteria(100);"Nitrospira"(100);"Nitrospira"(100);"Nitrospirales"(100);"Nitrospiraceae"(100);Nitrospira(100);
Otu01984	67	Bacteria(100);"Proteobacteria"(100);Deltaproteobacteria(100);Myxococcales(100);unclassified(100);unclassified(100);
Otu01985	67	Bacteria(100);"Proteobacteria"(100);Deltaproteobacteria(100);Myxococcales(100);unclassified(89);unclassified(89);
Otu01986	67	Bacteria(100);"Proteobacteria"(100);Deltaproteobacteria(100);Myxococcales(100);unclassified(100);unclassified(100);
Otu01987	67	Bacteria(100);unclassified(100);unclassified(100);unclassified(100);unclassified(100);unclassified(100);
Otu01988	67	Bacteria(100);"Proteobacteria"(100);Deltaproteobacteria(100);Myxococcales(100);Polyangiaceae(80);unclassified(100);
Otu01989	67	Bacteria(100);Firmicutes(100);unclassified(100);unclassified(100);unclassified(100);unclassified(100);
Otu01990	67	Bacteria(100);"Bacteroidetes"(100);"Sphingobacteria"(100);"Sphingobacteriales"(100);Chitinophagaceae(100);unclassified(100);
Otu01991	67	Bacteria(100);unclassified(100);unclassified(100);unclassified(100);unclassified(100);unclassified(100);
Otu01992	67	Bacteria(100);"Proteobacteria"(100);Deltaproteobacteria(100);Myxococcales(100);Polyangiaceae(80);unclassified(72);
Otu01993	67	Bacteria(100);"Proteobacteria"(100);Deltaproteobacteria(100);unclassified(100);unclassified(100);unclassified(100);
Otu01994	67	Bacteria(100);unclassified(100);unclassified(100);unclassified(100);unclassified(100);unclassified(100);
Otu01995	67	Bacteria(100);"Bacteroidetes"(100);"Sphingobacteria"(100);"Sphingobacteriales"(100);unclassified(100);unclassified(100);
Otu01996	66	Bacteria(100);"Planctomycetes"(100);"Planctomycetacia"(100);Planctomycetales(100);Planctomycetaceae(100);unclassified(100);
Otu01997	66	Bacteria(100);"Proteobacteria"(100);Deltaproteobacteria(100);Desulfuromonadales(100);Geobacteraceae(100);Geobacter(100);
Otu01998	66	Bacteria(100);"Chloroflexi"(100);unclassified(87);unclassified(87);unclassified(87);unclassified(87);
Otu01999	66	Bacteria(100);unclassified(96);unclassified(96);unclassified(96);unclassified(96);unclassified(96);
Otu02000	66	Bacteria(100);"Actinobacteria"(100);Actinobacteria(100);Actinomycetales(100);Micromonosporaceae(100);unclassified(100);
Otu02001	66	Bacteria(100);unclassified(100);unclassified(100);unclassified(100);unclassified(100);unclassified(100);
Otu02002	66	Bacteria(100);"Proteobacteria"(100);unclassified(97);unclassified(97);unclassified(97);unclassified(97);
Otu02003	66	Bacteria(100);unclassified(100);unclassified(100);unclassified(100);unclassified(100);unclassified(100);
Otu02004	66	Bacteria(100);unclassified(100);unclassified(100);unclassified(100);unclassified(100);unclassified(100);
Otu02005	66	Bacteria(100);"Proteobacteria"(100);Alphaproteobacteria(100);Rhodospirillales(100);Rhodospirillaceae(100);unclassified(100);
Otu02007	66	Bacteria(100);"Proteobacteria"(100);Alphaproteobacteria(100);unclassified(100);unclassified(100);unclassified(100);
Otu02008	66	Bacteria(100);unclassified(100);unclassified(100);unclassified(100);unclassified(100);unclassified(100);
Otu02009	66	Bacteria(100);unclassified(100);unclassified(100);unclassified(100);unclassified(100);unclassified(100);
Otu02010	66	Bacteria(100);"Chloroflexi"(100);Anaerolineae(100);Anaerolineales(100);Anaerolineaceae(100);unclassified(100);
Otu02011	66	Bacteria(100);unclassified(100);unclassified(100);unclassified(100);unclassified(100);unclassified(100);
Otu02012	66	Bacteria(100);"Planctomycetes"(100);"Planctomycetacia"(100);Planctomycetales(100);Planctomycetaceae(100);unclassified(100);
Otu02013	66	Bacteria(100);unclassified(100);unclassified(100);unclassified(100);unclassified(100);unclassified(100);
[truncated: 11,912 more rows]

## Sheet: Desc_HID
1	1.975	2	1.708	3	1.526
0.977564	1.979	2	1.884	3	1.864
1.02244	2.01	2	1.948	2.97756	1.876
1	2.025	1.97756	2.007	3.02244	1.893
1.04487	2.04	2.02244	2.013	3	1.92
0.955127	2.043	1.97756	2.032	3	1.949
1	2.055	2.02244	2.049	3	2.055
1.04487	2.061	1.97756	2.055	3.04487	2.066
0.955127	2.077	2.02244	2.073	2.95513	2.066
1	2.093			3.08975	2.072
1.04487	2.103			2.91025	2.074
0.955127	2.125

## Sheet: Desc_HID1
0.8	1.975	1.8	1.708	2.8	1.526
1.2	1.975	2.2	1.708	3.2	1.526
0.8	1.979	1.8	1.884	2.8	1.864
1.2	1.979	2.2	1.884	3.2	1.864
0.8	2.01	1.8	1.948	2.8	1.876
1.2	2.01	2.2	1.948	3.2	1.876
0.8	2.025	1.8	2.007	2.8	1.893
1.2	2.025	2.2	2.007	3.2	1.893
0.8	2.04	1.8	2.013	2.8	1.92
1.2	2.04	2.2	2.013	3.2	1.92
0.8	2.043	1.8	2.032	2.8	1.949
1.2	2.043	2.2	2.032	3.2	1.949
0.8	2.055	1.8	2.049	2.8	2.055
1.2	2.055	2.2	2.049	3.2	2.055
0.8	2.061	1.8	2.055	2.8	2.066
1.2	2.061	2.2	2.055	3.2	2.066
0.8	2.077	1.8	2.073	2.8	2.066
1.2	2.077	2.2	2.073	3.2	2.066
0.8	2.093			2.8	2.072
1.2	2.093			3.2	2.072
0.8	2.103			2.8	2.074
1.2	2.103			3.2	2.074
0.8	2.125
1.2	2.125

## Sheet: Desc_HID2
0.0833333	0.0500107	0.111111	0.00740447	0.0909091	0.00364514
0.166667	0.0598964	0.222222	0.20424	0.181818	0.307609
0.25	0.1935	0.333333	0.404794	0.272727	0.335338
0.333333	0.297736	0.444444	0.617495	0.363636	0.376175
0.416667	0.422001	0.555556	0.638259	0.454545	0.443797
0.5	0.448304	0.666667	0.701134	0.545455	0.518244
0.583333	0.554632	0.777778	0.752766	0.636364	0.767188
0.666667	0.606816	0.888889	0.769779	0.818182	0.788315
0.75	0.73482	1	0.816691	0.909091	0.799348
0.833333	0.837413			1	0.802948
0.916667	0.886216
1	0.955126

## Sheet: Desc_HID3
1.975	1.97754	1.708	1.81633	1.526	1.7023
1.979	1.99954	1.884	1.87415	1.864	1.77995
2.01	2.0137	1.948	1.91272	1.876	1.83044
2.025	2.02501	2.007	1.94472	1.893	1.87115
2.04	2.03497	2.013	1.97433	1.92	1.90744
2.043	2.04428	2.032	2.00394	1.949	1.94191
2.055	2.05339	2.049	2.03595	2.055	1.97638
2.061	2.0627	2.055	2.07451	2.066	2.03302
2.077	2.07266	2.073	2.13233	2.066	2.03302
2.093	2.08396			2.072	2.10386
2.103	2.09813			2.074	2.18152
2.125	2.12013

## Sheet: PCA_HID
	0.702816	0.593163	0.563783	-0.289788	-0.970148	-0.872305	-0.546503	0.813248	-1.3987	0.914484	0.0881638	-0.565211	0.398041	0.00583608	0.00493208	0.0113122	-0.105796	0.000141693
	0.596492	0.535189	0.75157	-0.502586	-0.656071	-1.30025	-0.321106	0.983749	0.564668	0.086895	1.08408	0.276279	0.223693	-0.0475369	-0.0938813	-0.114352	-0.00519573	-0.00202696
	1.2406	-0.12726	0.10557	0.491577	0.499743	1.43668	-0.344219	-1.21172	-1.97549	1.03556	-0.0128573	0.0726486	-0.496809	0.0687392	-0.0594244	-0.012211	0.00570423	0.0154573
	-2.08053	1.09133	-0.853679	1.92235	-0.431455	0.372512	-0.20767	0.484672	-0.262179	0.920912	0.224054	-0.573832	0.219048	-0.211737	0.0748582	-0.0153656	0.0843574	-0.000141258
	1.25241	0.0734781	-0.903801	0.751365	1.81976	-0.146604	0.264398	0.147334	1.53712	0.126372	1.05749	0.348473	0.232129	-0.0771063	-0.0516314	0.122481	0.0116363	0.0020895
	-0.0785276	0.126772	-0.496324	-0.419486	-1.62805	-0.399282	0.224102	-2.54102	1.0363	1.03223	-0.0302187	0.0516343	-0.505718	0.0606927	-0.064165	0.0206768	0.00683575	-0.0151479
	0.734711	-1.22362	-0.113315	1.38052	-0.658536	-0.6991	1.85124	0.520621	-0.255764	0.715652	-0.318129	0.505825	0.597329	0.323694	0.0366271	-0.00553592	0.0340427	-0.00039508
	0.643401	1.02092	-1.10543	-1.17752	-0.627464	1.7718	-0.185916	1.06839	0.646605	-0.0231744	1.0599	0.0221159	-0.390813	0.162449	0.171406	-0.00867216	-0.0181855	-0.000482832
	-0.313707	0.398265	0.0968754	0.0683958	1.34332	-1.33036	-1.68168	-0.660162	-0.110653	0.551259	-0.395564	0.883918	-0.0263763	-0.286964	0.0848335	-0.0121052	-0.0357433	-0.000338689
	-1.15643	0.848554	0.698505	-1.45274	1.25649	-0.0792287	2.09017	-0.24651	-0.563974
	-1.0262	-2.42595	-1.21484	-1.18612	0.122069	-0.0783997	-0.621241	0.513568	-0.382643
	-0.515029	-0.910842	2.47108	0.414033	-0.0696564	1.32454	-0.521569	0.127833	1.16472
